# Supplementary material for: 3α,5α-Cyclocholestan-6β-yl ethers as donors of the cholesterol moiety for the electrochemical synthesis of cholesterol glycoconjugates
Source: PubMed Central journal article supplement (PMC4362039; doi:10.3762/bjoc.11.16), 2015-01-26

## Supporting Information

for

### **3 $\alpha$ ,5 $\alpha$ -Cyclocholestan-6 $\beta$ -yl ethers as donors of the cholesterol moiety for the electrochemical synthesis of cholesterol glycoconjugates**

Aneta M. Tomkiel<sup>1</sup>, Adam Biedrzycki<sup>1</sup>, Jolanta Płoszyńska<sup>2</sup>, Dorota Naróg<sup>2</sup>, Andrzej Sobkowiak<sup>2</sup> and Jacek W. Morzycki\*<sup>1</sup>

Address: <sup>1</sup>Institute of Chemistry, University of Białystok, ul. Ciołkowskiego 1K, 15-245 Białystok, Poland and <sup>2</sup>Faculty of Chemistry, Rzeszów University of Technology, P.O. Box 85, 35-959 Rzeszów, Poland

Email: Jacek W. Morzycki – morzycki@uwb.edu.pl

\* Corresponding author

**Experimental section including <sup>1</sup>H, <sup>13</sup>C NMR, and mass spectra  
for all new compounds**

## Experimental

Cyclic voltammograms were recorded with iR compensation at 25 °C using a three-electrode potentiostat (Princeton Applied Research, model Parstat 2273). The experiments were conducted in a 3-mL electrochemical cell with an argon-purge system. The working electrode was a Bioanalytical Systems platinum inlay (1 mm in diameter), the auxiliary electrode was a platinum mesh (contained in a glass tube with a medium porosity glassfrit), and the reference electrode was Ag/0.1 M AgNO<sub>3</sub> in acetonitrile. The latter was contained in a Pyrex tube with a cracked softglass tip which was placed inside a Luggin capillary. Before each experiment, the working electrode was polished using Buehler Micropolish Alumina Gamma 3B and a Buehler Microcloth polishing cloth, rinsed with dichloromethane and dried. In all of the measurements, 0.2M solution of tetrabutylammonium tetrafluoroborate (TBABF<sub>4</sub>) from Aldrich in dichloromethane was used as a supporting electrolyte.

The preparative electrolyses were performed with a potentiostat/galvanostat (Princeton Applied Research, model Parstat 2273) under galvanostatic conditions using a current that was equal in a typical experiment to 7.5 mA and a reaction time of 4000 s. The current applied was the maximum current available for the electrolysis set-up being used (power supply and ohmic resistance). The reactions were monitored by TLC and stopped when no further increase in the concentration of the glycosylation products was observed. A divided H-cell was used in which the cathodic and anodic compartments (3.5 mL of electrolyte each) were separated by a glass frit. In all measurements, 0.1 M solution of tetrabutylammonium tetrafluoroborate (TBABF<sub>4</sub>) from Aldrich in dichloromethane was used as a supporting electrolyte. The steroid (0.30 mmol) and sugar (0.36 mmol) substrates were introduced into the anodic compartment together with 0.3 g of 3 Å molecular sieves added to eliminate traces of water, whereas anionite (1.5–2 g, Dowex 2 × 8, 200–400 mesh, perchlorate form) was placed in the cathodic compartment to eliminate chloride ions that are formed by the reduction of dichloromethane. The solutions in both compartments were stirred during electrolysis and, additionally, a continuous flow of argon was applied in the anodic compartment. A platinum mesh was used as a cathode and a platinum plate (2 × 1.5 cm) was used as an anode. All measurements were performed at 25 °C.

The sugar (1,2:3,4-di-*O*-isopropylidene- $\alpha$ -D-galactopyranose; **7**) [1] and steroidal substrates, 3 $\alpha$ ,5 $\alpha$ -cyclocholestan-6 $\beta$ -ol (*i*-cholesterol; **6a**) [2], 6 $\beta$ -methoxy-3 $\alpha$ ,5 $\alpha$ -cyclocholestane (**6b**) [3], and 6 $\beta$ -ethoxy-3 $\alpha$ ,5 $\alpha$ -cyclocholestane (**6c**) [4], were prepared according to known procedures.

Melting points were determined on a Toledo Mettler-MP70 apparatus. <sup>1</sup>H and <sup>13</sup>C NMR (400 and 100 MHz, respectively) spectra were recorded on a Bruker Avance II spectrometer in CDCl<sub>3</sub> solutions with TMS as the internal standard (only selected signals in the <sup>1</sup>H NMR spectra are reported; sugar protons are marked with the 'prime' index). Infrared spectra were recorded on a Nicolet series II Magna-IR 550 FTIR spectrometer in chloroform solutions. Mass spectra were recorded at 70 eV with a time-of-flight (TOF) AMD-604 spectrometer with electrospray ionization (ESI) or AutoSpec Premier (Waters) (EI).

Merck Silica Gel 60, F 256 TLC aluminum sheets were applied for thin-layer chromatographic analysis. For a visualization of the products, a 5% solution of phosphomolybdic acid in ethanol was used. The reaction products were separated by column chromatography performed on a 70–230 mesh silica gel (J. T. Baker).

### Synthesis of 6 $\beta$ -benzyloxy-3 $\alpha$ ,5 $\alpha$ -cyclocholestane (**6e**)

To cholesteryl *p*-tosylate (1 g; 1.9 mmol) dissolved in dioxane (50 mL) freshly dried potassium acetate (0.8 g; 5.7 mmol; 3 equiv.) and benzyl alcohol (6.2 g; 57 mmol; 30 equiv.) were added. The reaction mixture was refluxed for 24 h. After cooling it was poured into water (200 mL) and extracted with benzene (3  $\times$  100 mL). The extract was dried over anhydrous Na<sub>2</sub>SO<sub>4</sub> and evaporated to dryness *in vacuo*. The residue was subjected to silica gel column chromatography. Elution with CH<sub>2</sub>Cl<sub>2</sub>/hexane (1:9) afforded 6 $\beta$ -benzyloxy-3 $\alpha$ ,5 $\alpha$ -cyclocholestane (**6e**; 0.43 g; 48%).

**6e**: Colorless oil;  $[\alpha]_D^{20}$  +37.0 (*c* 1.0, CHCl<sub>3</sub>); R<sub>f</sub> = 0.31 (hexane-AcOEt 98:2); IR,  $\nu_{\max}$  (cm<sup>-1</sup>): 3064, 1496, 1093, 1067; <sup>1</sup>H NMR (ppm),  $\delta$ : 7.35 (m, 4H, H-Ar), 7.27 (m, 1H, H-Ar), 4.66 (d, 1H, *J* = 12.5 Hz, O-CH<sub>2</sub>Ph), 4.50 (d, 1H, *J* = 12.5 Hz, O-CH<sub>2</sub>Ph), 2.98 (m, 1H, H-6), 1.11 (s, 3H, H-19), 0.93 (d, 3H, *J* = 6.5 Hz, H-21), 0.887 (d, 3H, *J* = 6.6 Hz, H-26 or H-27), 0.883 (d, 3H, *J* = 6.6 Hz, H-26 or H-27), 0.72 (s, 3H, H-18), 0.67 (dd, 1H, *J* = 4.9 Hz, *J* = 4.1 Hz, H-4 $\alpha$ ), 0.41 (dd, 1H, *J* = 8.0 Hz, *J* = 4.9 Hz, H-4 $\beta$ ); <sup>13</sup>C NMR (ppm),  $\delta$ : 140.1 (C), 128.2 (CH), 127.1 (CH), 126.9 (CH), 80.2 (CH), 70.0 (CH<sub>2</sub>), 56.6 (CH), 56.4 (CH), 48.1 (CH), 43.3 (C), 42.8 (C), 40.4 (CH<sub>2</sub>), 39.5 (CH<sub>2</sub>), 36.2 (CH<sub>2</sub>), 35.8 (CH), 35.7 (C), 35.4 (CH<sub>2</sub>), 33.4 (CH<sub>2</sub>), 30.6 (CH), 28.3 (CH<sub>2</sub>), 28.0 (CH), 25.0 (CH<sub>2</sub>), 24.2 (CH<sub>2</sub>), 23.9 (CH<sub>2</sub>), 22.84 (CH<sub>2</sub>), 22.81 (CH<sub>3</sub>), 22.6 (CH<sub>3</sub>), 21.8 (CH), 19.5 (CH<sub>3</sub>), 18.7 (CH<sub>3</sub>), 13.2 (CH<sub>2</sub>), 12.3 (CH<sub>3</sub>); EI MS, *m/z*: 476 (M<sup>+</sup>, 35%), 461 [(M-Me)<sup>+</sup>, 7%], 385 [(M-Bn)<sup>+</sup>, 77%], 370 [(M-Bn-Me)<sup>+</sup>, 67%], 91 (100%).

6 $\beta$ -Isopropoxy-3 $\alpha$ ,5 $\alpha$ -cyclocholestane (**6d**) was obtained in a similar way (compound **6d** was eluted with hexane).

**6d**: Colorless oil;  $[\alpha]_D^{20}$  +43.4 (*c* 1.0, CHCl<sub>3</sub>); R<sub>f</sub> = 0.39 (hexane-AcOEt 98:2); IR,  $\nu_{\max}$  (cm<sup>-1</sup>): 1138, 1124, 1041; <sup>1</sup>H NMR (ppm),  $\delta$ : 3.74 (h, 1H, *J* = 6.1 Hz, O-CH(Me)<sub>2</sub>), 2.93 (m, 1H, H-6), 1.08 (d, 6H, *J* = 6.2 Hz, (CH<sub>3</sub>)<sub>2</sub>CH), 1.02 (s, 3H, H-19), 0.93 (d, 3H, *J* = 6.6 Hz, H-21), 0.881 (d, 3H, *J* = 6.6 Hz, H-26 or H-27), 0.877 (d, 3H, *J* = 6.6 Hz, H-26 or H-27), 0.73 (s, 3H, H-18), 0.58 (dd, 1H, *J* = 4.9 Hz, *J* = 3.9 Hz, H-4 $\alpha$ ), 0.33 (dd, 1H, *J* = 7.9 Hz, *J* = 4.9 Hz, H-4 $\beta$ ); <sup>13</sup>C NMR (ppm),  $\delta$ : 76.9 (CH), 67.1 (CH), 56.6 (CH), 56.4 (CH), 48.2 (CH), 43.2 (C), 42.8 (C), 40.4 (CH<sub>2</sub>), 39.6 (CH<sub>2</sub>), 36.4 (C), 36.2 (CH<sub>2</sub>), 35.9 (CH), 35.8 (CH<sub>2</sub>), 33.4 (CH<sub>2</sub>), 30.4 (CH), 28.4 (CH<sub>2</sub>), 28.0 (CH), 25.1 (CH<sub>2</sub>), 24.3 (CH<sub>2</sub>), 23.9 (CH<sub>2</sub>), 22.9 (CH<sub>2</sub>), 22.8 (CH<sub>3</sub>), 22.6 (CH<sub>3</sub>), 22.52 (CH<sub>3</sub>), 22.47 (CH<sub>3</sub>), 22.3 (CH), 19.6 (CH<sub>3</sub>), 18.7 (CH<sub>3</sub>), 12.8 (CH<sub>2</sub>), 12.2 (CH<sub>3</sub>); EI MS, *m/z*: 428 [M<sup>+</sup>, 56%], 413 [(M-Me)<sup>+</sup>, 20%], 386 [(M-propene)<sup>+</sup>, 17%], 371 [(M-Me-propene)<sup>+</sup>, 81%], 43 (100%).

6 $\beta$ -(4-Hydroxyphenyloxy)-3 $\alpha$ ,5 $\alpha$ -cyclocholestane (**6g**) was obtained in a similar way (compound **6g** was eluted with a hexane-ethyl acetate (93:7) mixture).

**6g**: Beige crystalline material, mp 54-56 °C (CH<sub>2</sub>Cl<sub>2</sub>-hexane);  $[\alpha]_D^{20}$  +24.4 (*c* 0.33, CHCl<sub>3</sub>); R<sub>f</sub> = 0.27 (hexane-AcOEt 9:1); IR,  $\nu_{\max}$ (cm<sup>-1</sup>): 3601, 3340, 1601, 1507, 1175, 827; <sup>1</sup>H NMR (ppm),  $\delta$ : 6.79 (d, 2H, *J* = 9.0 Hz, H-Ar), 6.72 (d, 2H, *J* = 9.0 Hz, H-Ar), 4.36 (s, 1H, -OH), 3.64 (m, 1H, H-6), 1.16 (s, 3H, H-19), 0.93 (d, 3H, *J* = 6.5 Hz, H-21), 0.876 (d, 3H, *J* = 6.6 Hz, H-26 or H-27), 0.872 (d, 3H, *J* = 6.6 Hz, H-26 or H-27), 0.73 (s, 3H, H-18), 0.60 (dd, 1H, *J* = 5.1 Hz, *J* = 3.9 Hz, H-4 $\alpha$ ), 0.34 (dd, 1H, *J* = 7.9 Hz, *J* = 5.1 Hz, H-4 $\beta$ ); <sup>13</sup>C NMR (ppm),  $\delta$ : 152.4 (C), 150.1 (C), 119.2 (CH), 116.0 (CH), 82.5 (CH), 56.39 (CH), 56.35 (CH), 47.7 (CH), 43.2 (C), 42.7 (C), 40.2 (CH<sub>2</sub>), 39.5 (CH<sub>2</sub>), 36.6 (C), 36.2 (CH<sub>2</sub>), 35.8 (CH), 34.5 (CH<sub>2</sub>), 33.4 (CH<sub>2</sub>), 30.3 (CH), 28.2 (CH<sub>2</sub>), 28.0 (CH), 25.0 (CH<sub>2</sub>), 24.1 (CH<sub>2</sub>), 23.8 (CH<sub>2</sub>), 23.5 (CH), 22.8 (CH<sub>3</sub>), 22.7 (CH<sub>2</sub>), 22.5 (CH<sub>3</sub>), 19.9 (CH<sub>3</sub>), 18.7 (CH<sub>3</sub>), 12.6 (CH<sub>2</sub>), 12.1 (CH<sub>3</sub>); EI MS, *m/z*: 478 (M<sup>+</sup>, 1%), 369 [(M-*p*-OH-PhO)<sup>+</sup>, 100%].

### Synthesis of 6 $\beta$ -phenyloxy-3 $\alpha$ ,5 $\alpha$ -cyclocholestane (**6f**)

Phenol (10 g; 0.1 mol, 36 equiv.) was melted at 42 °C. Then cholesteryl *p*-tosylate (1.5 g; 2.8 mmol) and freshly dried potassium acetate (0.8 g; 8.2 mmol, 3 equiv.) were added. The stirred reaction mixture was maintained at this temperature for 2 h. After cooling it was poured into 100 mL of 1 M NaOH solution and extracted with benzene (3  $\times$  100 mL). The extract was dried over anhydrous Na<sub>2</sub>SO<sub>4</sub> and evaporated to dryness *in vacuo*. The reaction products were separated by silica gel column chromatography. 6 $\beta$ -Phenyloxy-3 $\alpha$ ,5 $\alpha$ -cyclocholestane (**6f**; 0.27 g, 21%) was eluted with hexane. Further elution with a hexane/ethyl acetate (99:1) mixture afforded cholesteryl phenyl ether **12f** (0.41 g; 32%).

**6f**: White crystals, mp 58-61 °C (AcOEt-hexane);  $[\alpha]_D^{20} +36.5$  (*c* 0.33, CHCl<sub>3</sub>); R<sub>f</sub> = 0.28 (hexane); IR,  $\nu_{\max}$  (cm<sup>-1</sup>): 3064, 1597, 1243; <sup>1</sup>H NMR (ppm),  $\delta$ : 7.26 (m, 2H, H-Ar), 6.91 (m, 3H, H-Ar), 3.82 (m, 1H, H-6), 1.19 (s, 3H, H-19), 0.94 (d, 3H, *J* = 6.5 Hz, H-21), 0.893 (d, 3H, *J* = 6.6 Hz, H-26 or H-27), 0.889 (d, 3H, *J* = 6.6 Hz, H-26 or H-27), 0.74 (s, 3H, H-18), 0.62 (dd, 1H, *J* = 5.2 Hz, *J* = 3.9 Hz, H-4 $\alpha$ ), 0.36 (dd, 1H, *J* = 7.9 Hz, *J* = 5.2 Hz, H-4 $\beta$ ); <sup>13</sup>C NMR (ppm),  $\delta$ : 158.6 (C), 129.2 (CH), 120.5 (CH), 116.9 (CH), 80.7 (CH), 56.4 (CH), 56.3 (CH), 47.7 (CH), 43.2 (C), 42.7 (C), 40.2 (CH<sub>2</sub>), 39.5 (CH<sub>2</sub>), 36.7 (C), 36.2 (CH<sub>2</sub>), 35.8 (CH), 34.3 (CH<sub>2</sub>), 33.3 (CH<sub>2</sub>), 30.4 (CH), 28.2 (CH<sub>2</sub>), 28.0 (CH), 25.1 (CH<sub>2</sub>), 24.1 (CH<sub>2</sub>), 23.9 (CH<sub>2</sub>), 23.6 (CH), 22.81 (CH<sub>3</sub>), 22.76 (CH<sub>2</sub>), 22.6 (CH<sub>3</sub>), 19.8 (CH<sub>3</sub>), 18.7 (CH<sub>3</sub>), 12.6 (CH<sub>2</sub>), 12.2 (CH<sub>3</sub>); EI MS, *m/z*: 462 (M<sup>+</sup>, 1%), 369 [(M-PhO)<sup>+</sup>, 100%].

### Synthesis of 6 $\beta$ -*t*-butyldimethylsilyloxy-3 $\alpha$ ,5 $\alpha$ -cyclocholestane (**6h**)

*i*-Cholesterol (1 g; 2.6 mmol), TBDMSCl (584 mg; 3.88 mmol, 1.5 equiv.), imidazole (530 mg; 7.8 mmol; 3 equiv.), and DMAP (64 mg; 0.52 mmol; 0.2 equiv.) were dissolved in 16 mL of anhydrous DMF. The reaction was carried out for 5 h (TLC control) at 80 °C under argon. The reaction was poured into water and extracted with benzene. The extract was dried with anhydrous Na<sub>2</sub>SO<sub>4</sub> and the solvent was evaporated *in vacuo*. The residue was subjected to flash column chromatography with hexane as an eluent. Yield of 6 $\beta$ -*t*-butyldimethylsilyloxy-3 $\alpha$ ,5 $\alpha$ -cyclocholestane (**6h**) - 688 mg (53%).

**6h**: White crystals, mp 70-71 °C (AcOEt-hexane);  $[\alpha]_D^{20} +27.0$  (*c* 1.0, CHCl<sub>3</sub>); R<sub>f</sub> = 0.84 (hexane); IR,  $\nu_{\max}$  (cm<sup>-1</sup>): 1254, 1065; <sup>1</sup>H NMR (ppm),  $\delta$ : 3.20 (m, 1H, H-6), 1.02 (s, 3H, H-19), 0.93 (d, 3H, *J* = 6.5 Hz, H-21), 0.89 (s, 9H, *t*-Bu), 0.881 (d, 3H, *J* = 6.6 Hz, H-26 or H-27), 0.877 (d, 3H, *J* = 6.6 Hz, H-26 or H-27), 0.72 (s, 3H, H-18), 0.48 (dd, 1H, *J* = 4.9 Hz, *J* = 3.8 Hz, H-4 $\alpha$ ), 0.18 (dd, 1H, *J* = 7.9 Hz, *J* = 4.9 Hz, H-4 $\beta$ ), 0.01 (s, 3H, Si-CH<sub>3</sub>), -0.01 (s, 3H, Si-CH<sub>3</sub>); <sup>13</sup>C NMR (ppm),  $\delta$ : 74.4 (CH), 56.4 (CH), 56.3 (CH), 47.9 (CH), 43.3 (C), 42.7 (C), 40.4 (CH<sub>2</sub>), 39.6 (CH<sub>2</sub>), 39.1 (CH<sub>2</sub>), 38.3 (C), 36.3 (CH<sub>2</sub>), 35.9 (CH), 33.4 (CH<sub>2</sub>), 30.0 (CH), 28.4 (CH<sub>2</sub>), 28.1 (CH), 25.8 (CH<sub>3</sub>), 25.2 (CH<sub>2</sub>), 24.3 (CH<sub>2</sub>), 23.9 (CH<sub>2</sub>), 23.6 (CH), 22.9 (CH<sub>3</sub>), 22.8 (CH<sub>2</sub>), 22.6 (CH<sub>3</sub>), 20.2 (CH<sub>3</sub>), 18.8 (CH<sub>3</sub>), 18.0 (C), 12.8 (CH<sub>2</sub>), 12.0 (CH<sub>3</sub>), -4.5 (CH<sub>3</sub>), -4.8 (CH<sub>3</sub>); ESI MS, *m/z*: 523 [(M+Na)<sup>+</sup>, 20%].

Typical electrochemical experiment. Anodic oxidation of 6 $\beta$ -phenyloxy-3 $\alpha$ ,5 $\alpha$ -cyclocholestane (**6f**) in the presence of 1,2:3,4-di-*O*-isopropylidene-D-galactopyranose (**7**)

6 $\beta$ -Phenyloxy-3 $\alpha$ ,5 $\alpha$ -cyclocholestane (138 mg; 0.30 mmol) and 1,2:3,4-di-*O*-isopropylidene-D-galactopyranose (94 mg; 0.36 mmol) were dissolved in a 0.1 M solution of tetrabutylammonium-tetrafluoroborate in dichloromethane (3.5 mL) and introduced into the anodic compartment together with 0.5 g 3 Å molecular sieves to eliminate traces of water. The same supporting electrolyte was placed in the cathodic compartment with anionite (2 g, Dowex 2x8, 200–400 mesh,

perchlorate form) added. Preparative electrolysis was carried out in a divided H-cell in which the cathodic and anodic compartments (3.5 mL of electrolytes each) were separated by a glass frit under galvanostatic conditions. A direct current 7.5 mA was run for 4000 s. A platinum mesh was used as a cathode and a platinum plate (2 × 1.5 cm) was used as an anode. Ag/0.1 M AgNO<sub>3</sub> in acetonitrile electrode was used as a reference. When the electrolysis was completed, the solvent was removed from the reaction mixture and the products were separated by silica gel column chromatography. The hexane elution afforded diene **13** (1 mg; 1%) and cholesteryl chloride **14** (1 mg; 1%). With the hexane-ethyl acetate mixture (96:4), cholesteryl phenyl ether **12f** (31 mg; 22%) was eluted. Further elution with hexane-ethyl acetate (93:7) afforded 3β-O-(1',2':3',4'-di-O-isopropylidene-α-D-galactopyranos-6'-yl)-cholest-5-ene **11** (108 mg; 58%), followed by cholesterol **1** (5 mg, 4%) eluted with hexane/ethyl acetate (9:1).

Glycosylation product **11** was described in our previous report [5]. Also, other products of the electrochemical reactions (compounds **2**, **13**, **14**, and **15**) were described in our previous papers [6-9]. The isomerization products, i.e., 3β-cholesteryl ethers **12b** [10], **12c** [11], **12e** [12], **12f** [12], **12g** [9], and **12h** [13], are known compounds, except for **12d** which was obtained during electrochemical reaction of 3α,5α-cyclocholestan-6β-yl isopropyl ether (**6d**).

**12d**: White crystals, mp 122-124 °C (AcOEt-hexane);  $[\alpha]_D^{20}$  -24.1 (c 1.0, CHCl<sub>3</sub>); R<sub>f</sub> = 0.44 (hexane-AcOEt 95:5); IR, ν<sub>max</sub> (cm<sup>-1</sup>): 1125, 1064; <sup>1</sup>H NMR (ppm), δ: 5.35 (m, 1H, H-6), 3.73 (h, 1H, J = 6.1 Hz, O-CH(Me)<sub>2</sub>), 3.22 (m, 1H, H-6), 1.151 (d, 3H, J = 6.1 Hz, CH<sub>3</sub>-isopropyl), 1.148 (d, 3H, J = 6.1 Hz, CH<sub>3</sub>-isopropyl), 1.01 (s, 3H, H-19), 0.93 (d, 3H, J = 6.6 Hz, H-21), 0.877 (d, 3H, J = 6.6 Hz, H-26 or H-27), 0.873 (d, 3H, J = 6.6 Hz, H-26 or H-27), 0.67 (s, 3H, H-18); <sup>13</sup>C NMR (ppm), δ: 141.4 (C), 121.3 (CH), 76.3 (CH), 68.5 (CH), 56.8 (CH), 56.2 (CH), 50.3 (CH), 42.3 (C), 40.0 (CH<sub>2</sub>), 39.8 (CH<sub>2</sub>), 39.5 (CH<sub>2</sub>), 37.5 (CH<sub>2</sub>), 36.9 (C), 36.2 (CH<sub>2</sub>), 35.8 (CH), 32.0 (CH<sub>2</sub>), 31.9 (CH), 29.3 (CH<sub>2</sub>), 28.2 (CH<sub>2</sub>), 28.0 (CH), 24.3 (CH<sub>2</sub>), 23.8 (CH<sub>2</sub>), 23.03 (CH<sub>3</sub>), 22.95 (CH<sub>3</sub>), 22.8 (CH<sub>3</sub>), 22.6 (CH<sub>3</sub>), 21.1 (CH<sub>2</sub>), 19.4 (CH<sub>3</sub>), 18.7 (CH<sub>3</sub>), 11.9 (CH<sub>3</sub>); EI MS, m/z: 428 [M<sup>+</sup>, 15%], 370 [(M-i-Pr-Me)<sup>+</sup>, 63%], 329 (100%).

#### References:

1. Calinaud, P.; Gelas, J. Synthesis of isopropylidene, benzylidene, and related acetals. In *Preparative Carbohydrate Chemistry*; Hanessian, S., Ed.; Marcel Dekker: New York, USA, 1997; pp 3–34.
2. Patel, M. S.; Peal, W. J. *J. Chem. Soc.* **1963**, 1544–1546.
3. Ford, E. G.; Wallis, E. S. *J. Am. Chem. Soc.* **1937**, *59*, 1415-1416.
4. Beynon, J. H.; Heilbron, I. M.; Spring, F. S. *J. Chem. Soc.* **1936**, 907-910.
5. Tomkiel, A. M.; Brzezinski, K.; Łotowski, Z.; Siergieńczyk, L.; Wałejko, P.; Witkowski, S.; Kowalski, J.; Płoszyńska, J.; Sobkowiak, A.; Morzycki, J. W. *Tetrahedron* **2013**, *69*, 8904–8913.
6. Kowalski, J.; Morzycki, J. W.; Sobkowiak, A.; Wilczewska, A. Z. *Steroids* **2008**, *73*, 543–548.
7. Kowalski, J.; Płoszyńska, J.; Sobkowiak, A.; Morzycki, J. W.; Wilczewska, A. Z. *J. Electroanal. Chem.* **2005**, *585*, 275–280.
8. Morzycki, J. W.; Łotowski, Z.; Siergieńczyk, L.; Wałejko, P.; Witkowski, S.; Kowalski, J.; Płoszyńska, J.; Sobkowiak, A. *Carbohydr. Res.* **2010**, *345*, 1051–1055.
9. Tomkiel, A. M.; Kowalski, J.; Płoszyńska, J.; Siergieńczyk, L.; Łotowski, Z.; Sobkowiak, A.; Morzycki, J. W. *Steroids* **2014**, *82*, 60–67.
10. Narayanan, C. R.; Iyer, K. N. *J. Org. Chem.* **1965**, *30*, 1734–1736.
11. Wang, B.; Du, H.; Zhang, J. *Steroids* **2011**, *76*, 204–209.
12. Lu, B.; Li, L. J.; Li, T. S.; Li, J. T. *J Chem Res (S)* **1998**, 604–605.
13. Bartoszewicz, A.; Kalek, M.; Stawinski, J. *Tetrahedron* **2008**, *64*, 8843–8850.

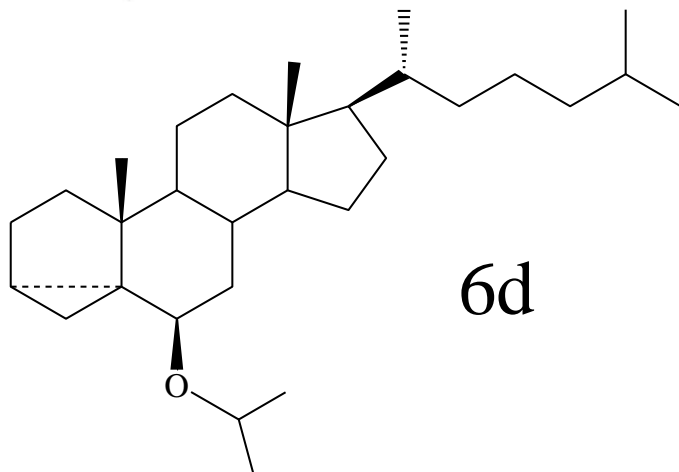

Current Data Parameters  
 NAME AT 214  
 EXPNO 1  
 PROCNO 1

F2 - Acquisition Parameters  
 Date\_ 20131014  
 Time 14.53  
 INSTRUM spect  
 PROBHD 5 mm PABBO BB-  
 PULPROG zg30  
 TD 65536  
 SOLVENT CDC13  
 NS 64  
 DS 0  
 SWH 8223.685 Hz  
 FIDRES 0.125483 Hz  
 AQ 3.9846387 sec  
 RG 50.8  
 DW 60.800 usec  
 DE 8.00 usec  
 TE 673.2 K  
 D1 1.00000000 sec  
 TD0 1

==== CHANNEL f1 =====  
 NUC1 1H  
 P1 11.15 usec  
 PL1 -3.00 dB  
 SFO1 400.1524711 MHz

F2 - Processing parameters  
 SI 32768  
 SF 400.1500000 MHz  
 WDW GM  
 SSB 0  
 LB -0.20 Hz  
 GB 0.2  
 PC 1.00

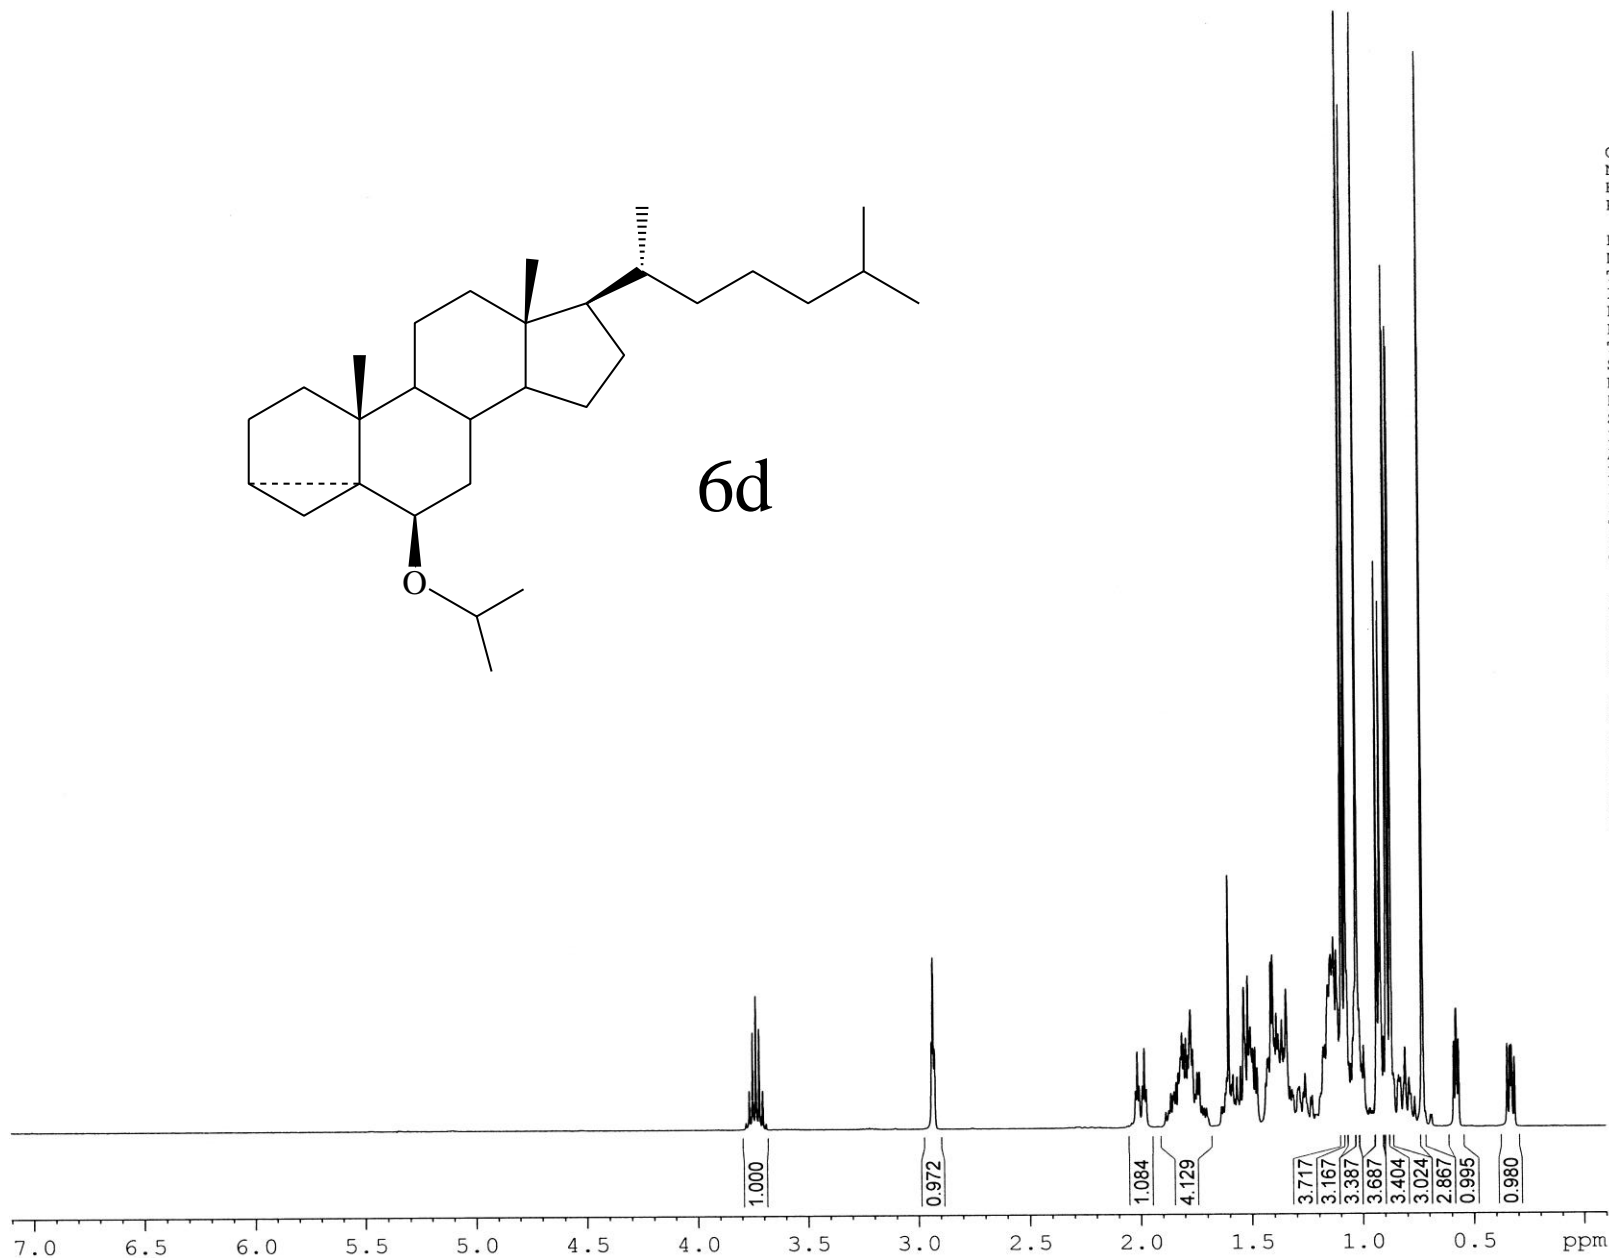

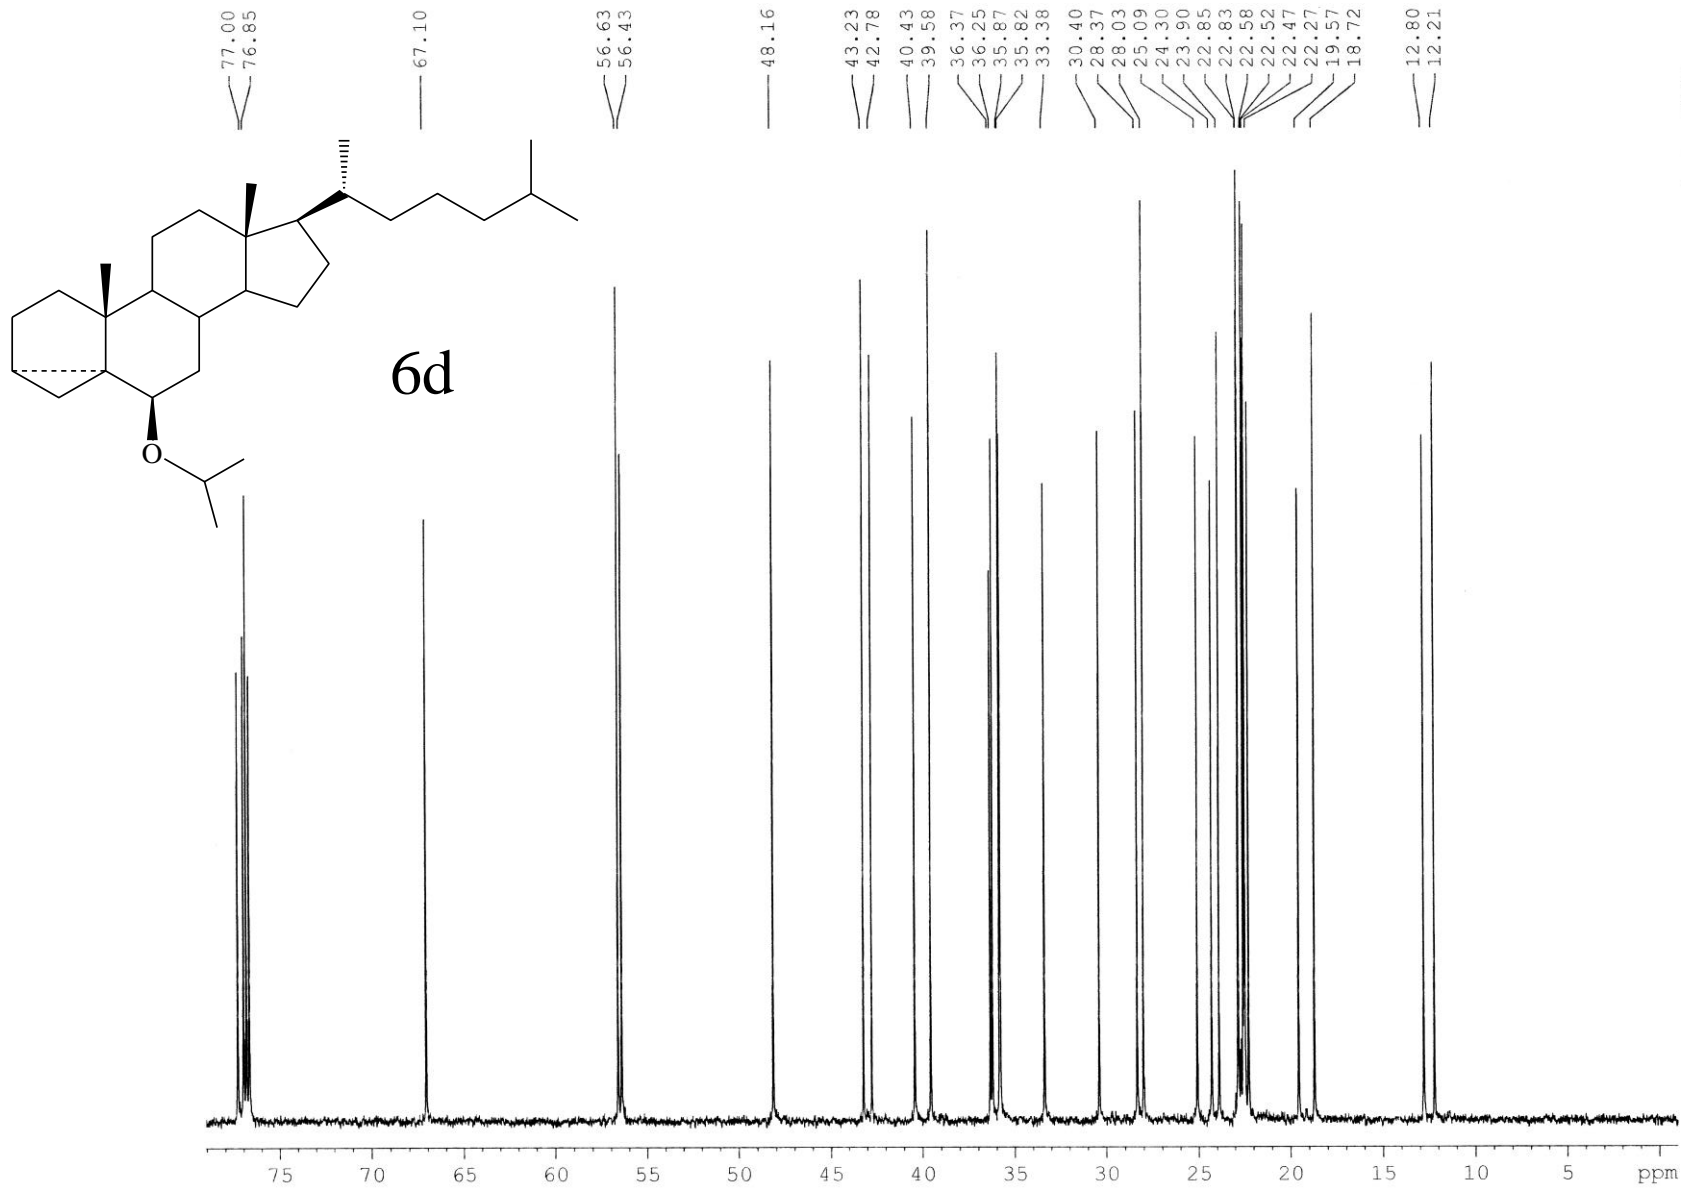

Current Data Parameters  
 NAME AT 216f1  
 EXPNO 2  
 PROCNO 1

F2 - Acquisition Parameters  
 Date\_ 20131122  
 Time 17.40  
 INSTRUM spect  
 PROBHD 5 mm PABBO BB-  
 PULPROG zgpg30  
 TD 65536  
 SOLVENT CDCl3  
 NS 224  
 DS 4  
 SWH 27173.912 Hz  
 FIDRES 0.414641 Hz  
 AQ 1.2059124 sec  
 RG 1030  
 DW 18.400 usec  
 DE 6.00 usec  
 TE 673.2 K  
 D1 2.00000000 sec  
 d11 0.03000000 sec  
 DELTA 1.89999998 sec  
 TD0 1

===== CHANNEL f1 =====  
 NUC1 13C  
 P1 12.25 usec  
 PL1 -1.00 dB  
 SFO1 100.6288660 MHz

===== CHANNEL f2 =====  
 CPDPRG2 waltz16  
 NUC2 1H  
 PCPD2 100.00 usec  
 PL2 -3.00 dB  
 PL12 13.65 dB  
 PL13 18.00 dB  
 SFO2 400.1516006 MHz

F2 - Processing parameters  
 SI 32768  
 SF 100.6177963 MHz  
 WDW EM  
 SSB 0  
 LB 1.00 Hz  
 GB 0  
 PC 0.20

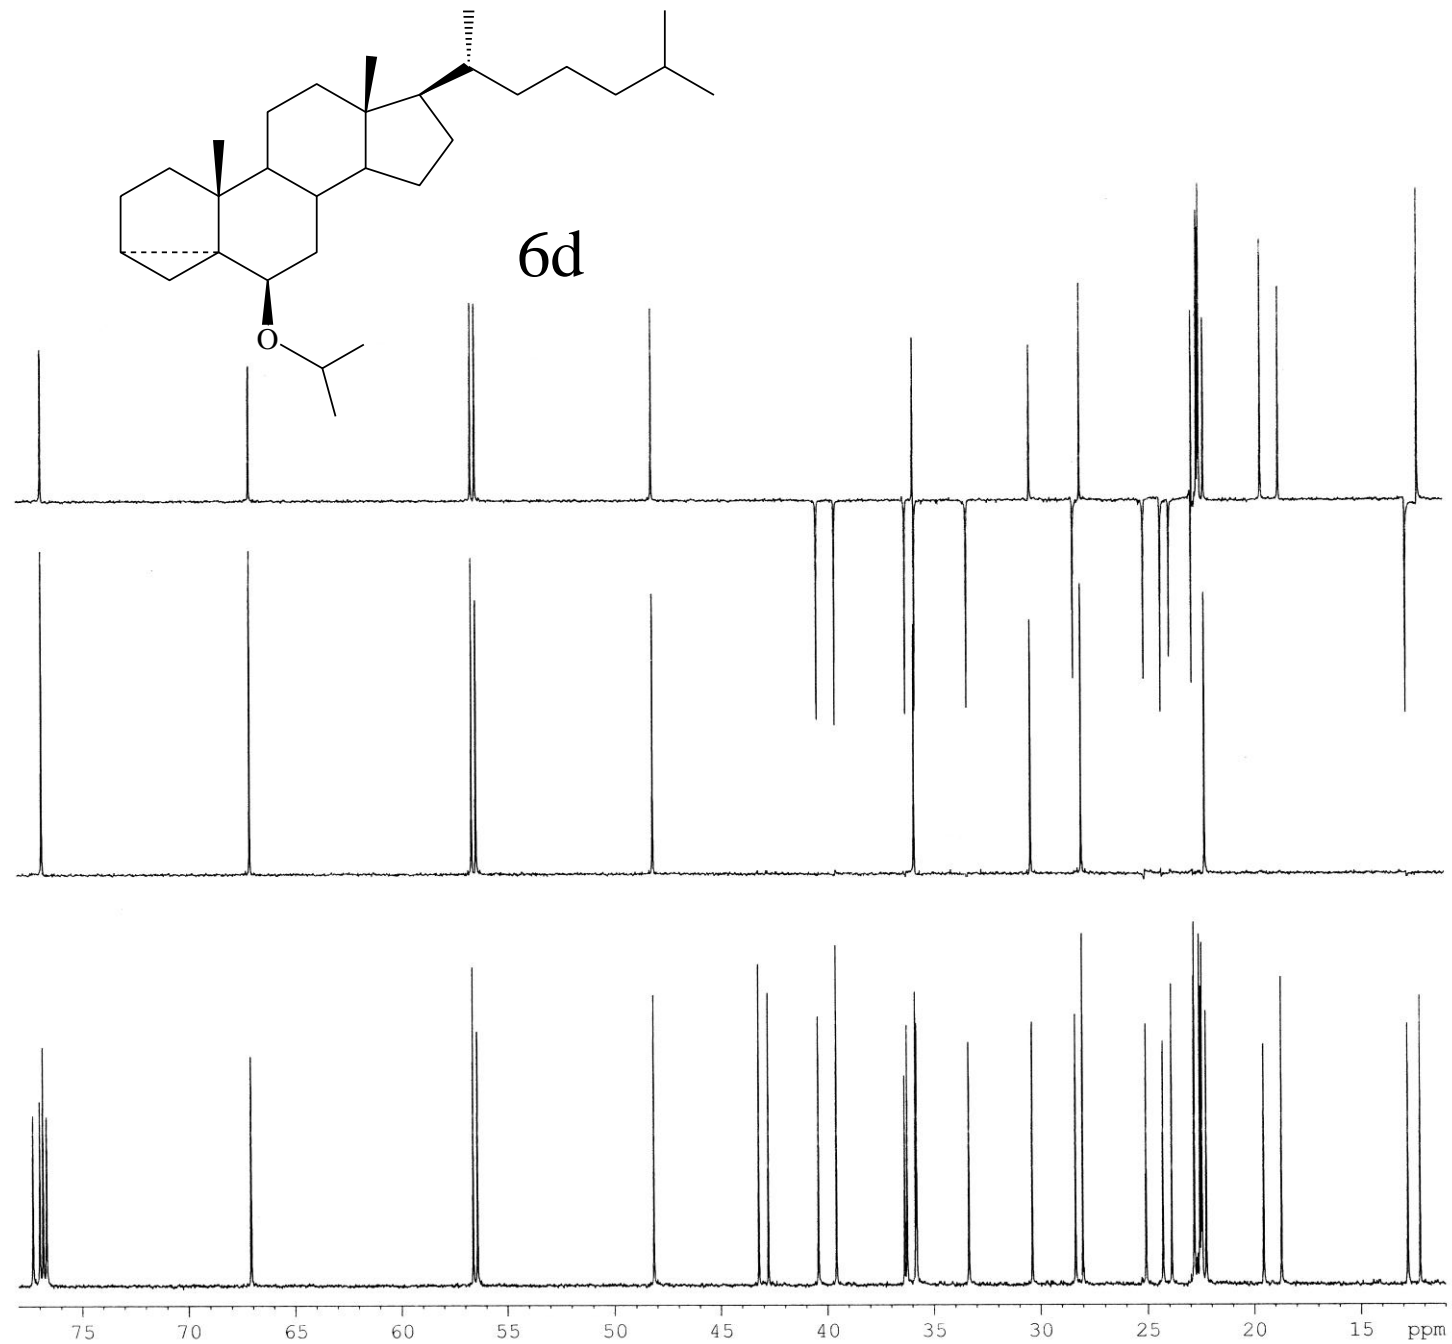

```

Current Data Parameters
NAME          AT 216f1
EXPNO         4
PROCNO        1

F2 - Acquisition Parameters
Date_         20131122
Time          18.00
INSTRUM       spect
PROBHD        5 mm PABBO BB-
PULPROG       dept135
TD            65536
SOLVENT       CDC13
NS            96
DS            4
SWH           24038.461 Hz
FIDRES        0.366798 Hz
AQ            1.3631988 sec
RG            1030
DW            20.800 usec
DE            6.00 usec
TE            673.2 K
CNST2         145.0000000
D1            2.00000000 sec
d2            0.00344828 sec
d12           0.00002000 sec
DELTA         0.00001560 sec
TD0           1

===== CHANNEL f1 =====
NUC1           13C
P1             12.25 usec
p2            24.50 usec
PL1           -1.00 dB
SFO1          100.6278593 MHz

===== CHANNEL f2 =====
CPDPRG2       waltz16
NUC2           1H
P3             14.70 usec
p4            29.40 usec
PCPD2         100.00 usec
PL2           -3.00 dB
PL12          13.65 dB
SFO2          400.1516006 MHz

F2 - Processing parameters
SI             32768
SF            100.6177949 MHz
WDW            EM
SSB            0
LB             1.00 Hz
GB            0
PC            0.20

```



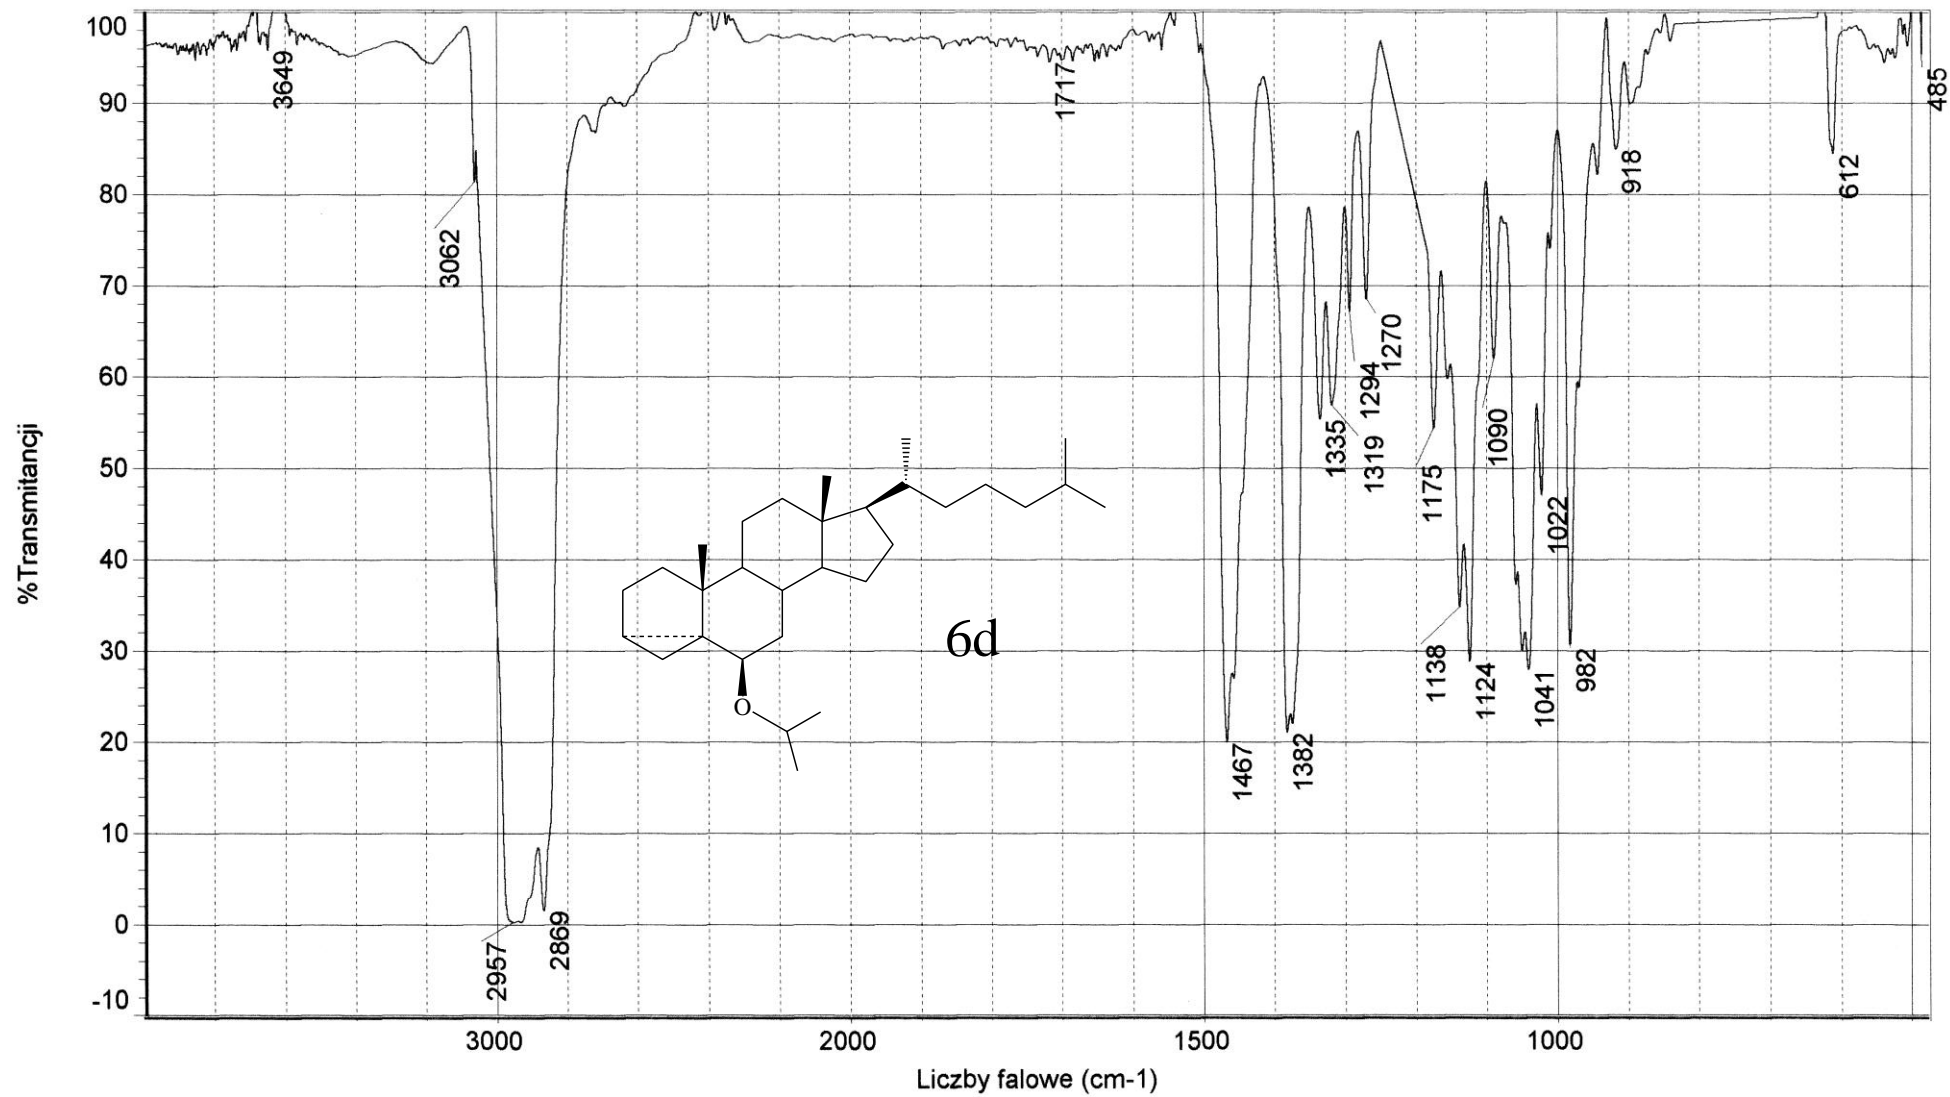

AT214

ub\_jm3232 12 (0.952) Cm (9:17)

Magnet EI+  
3.58e3

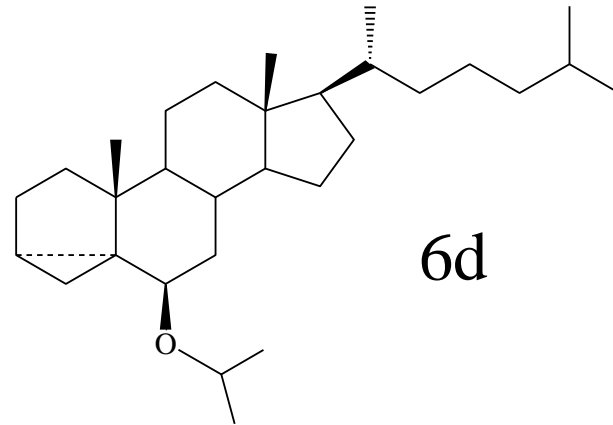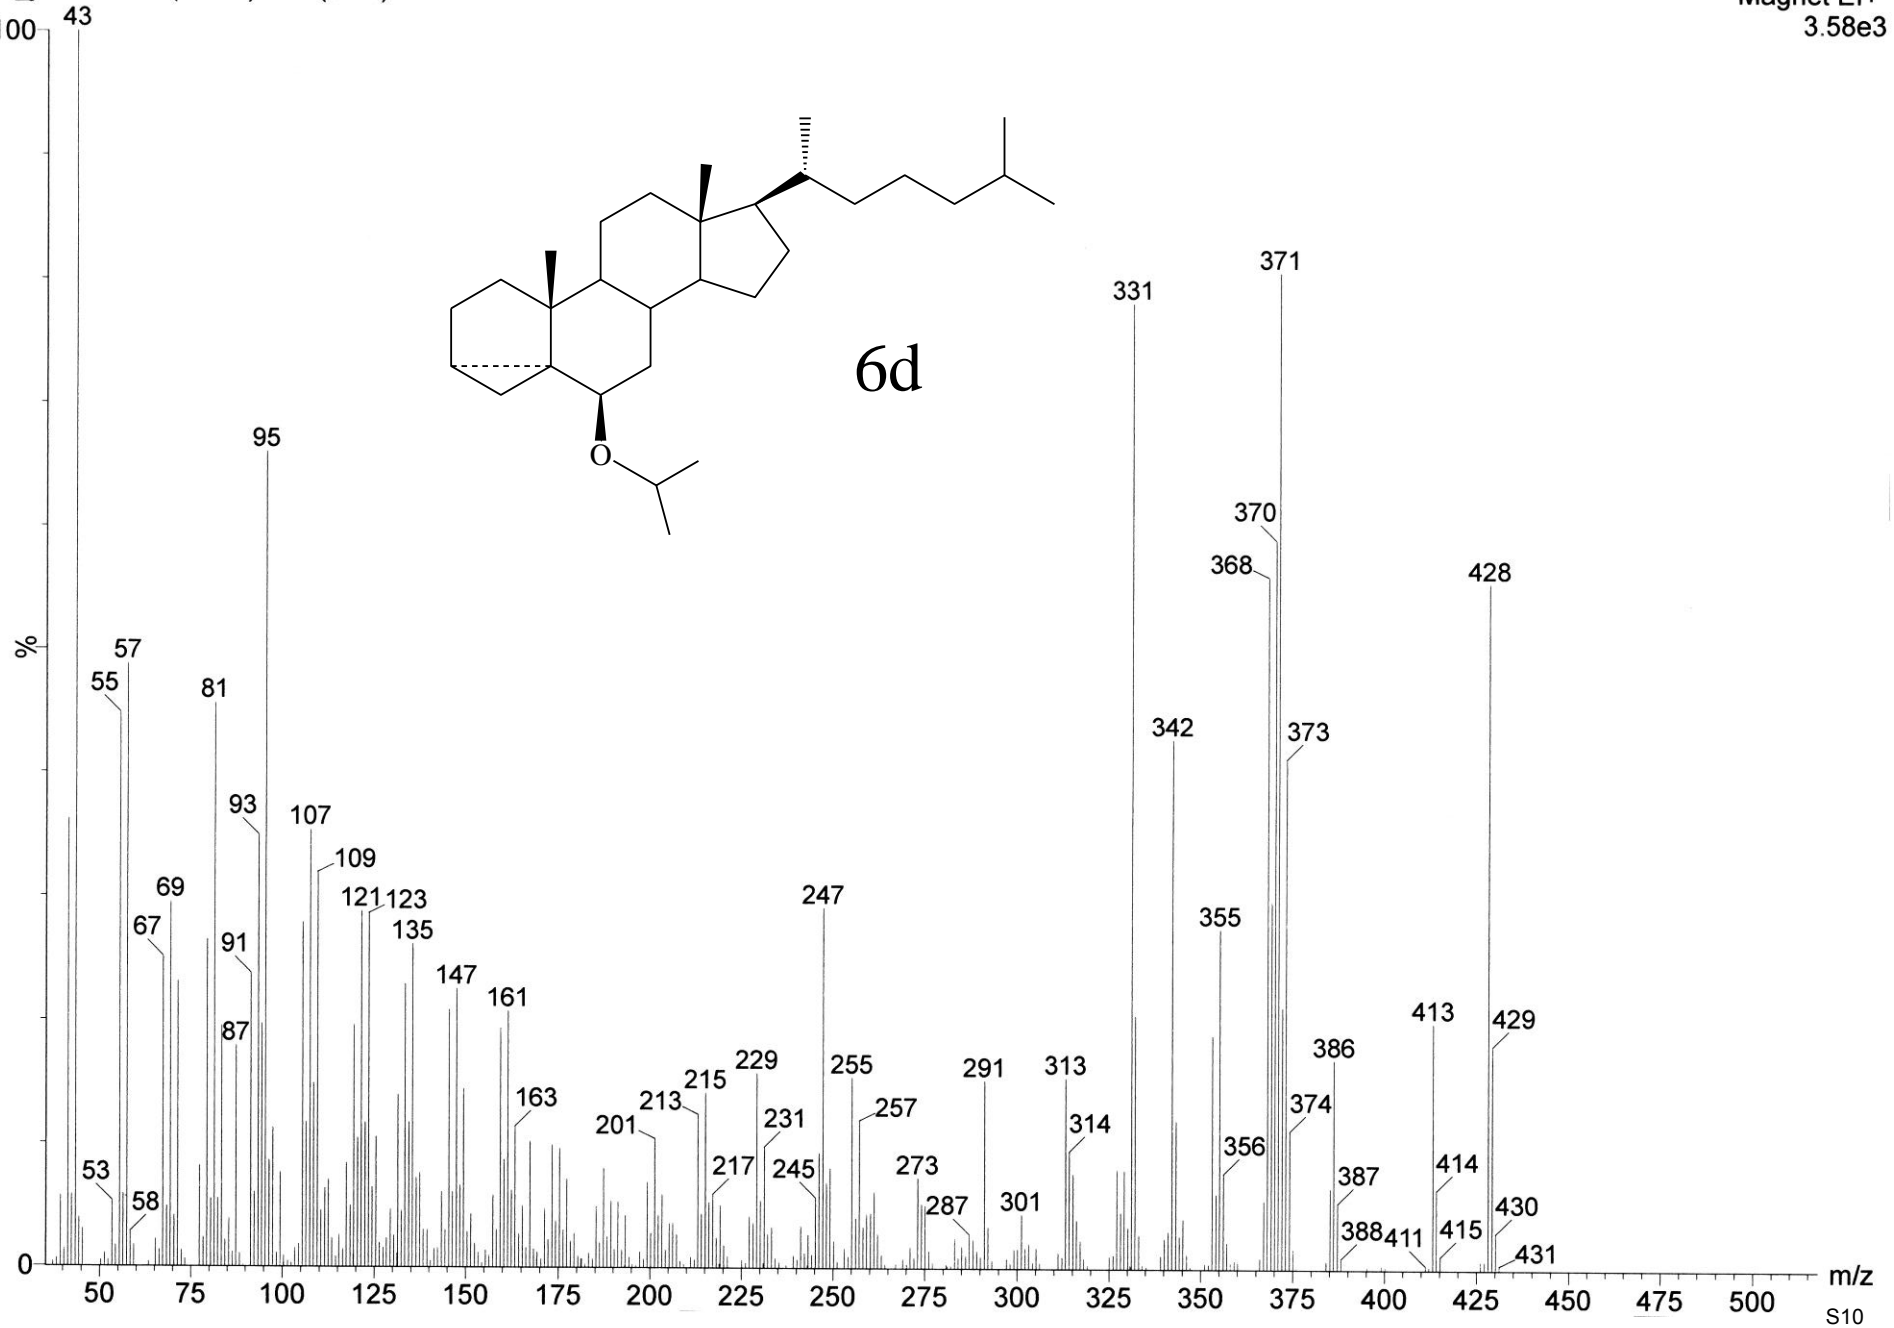

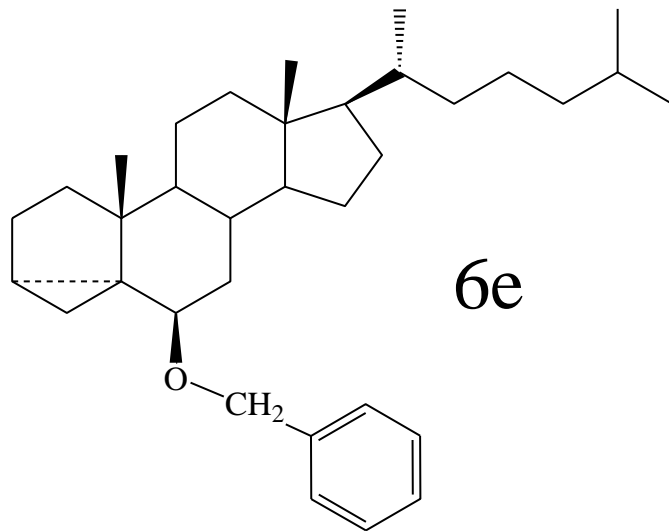

6e

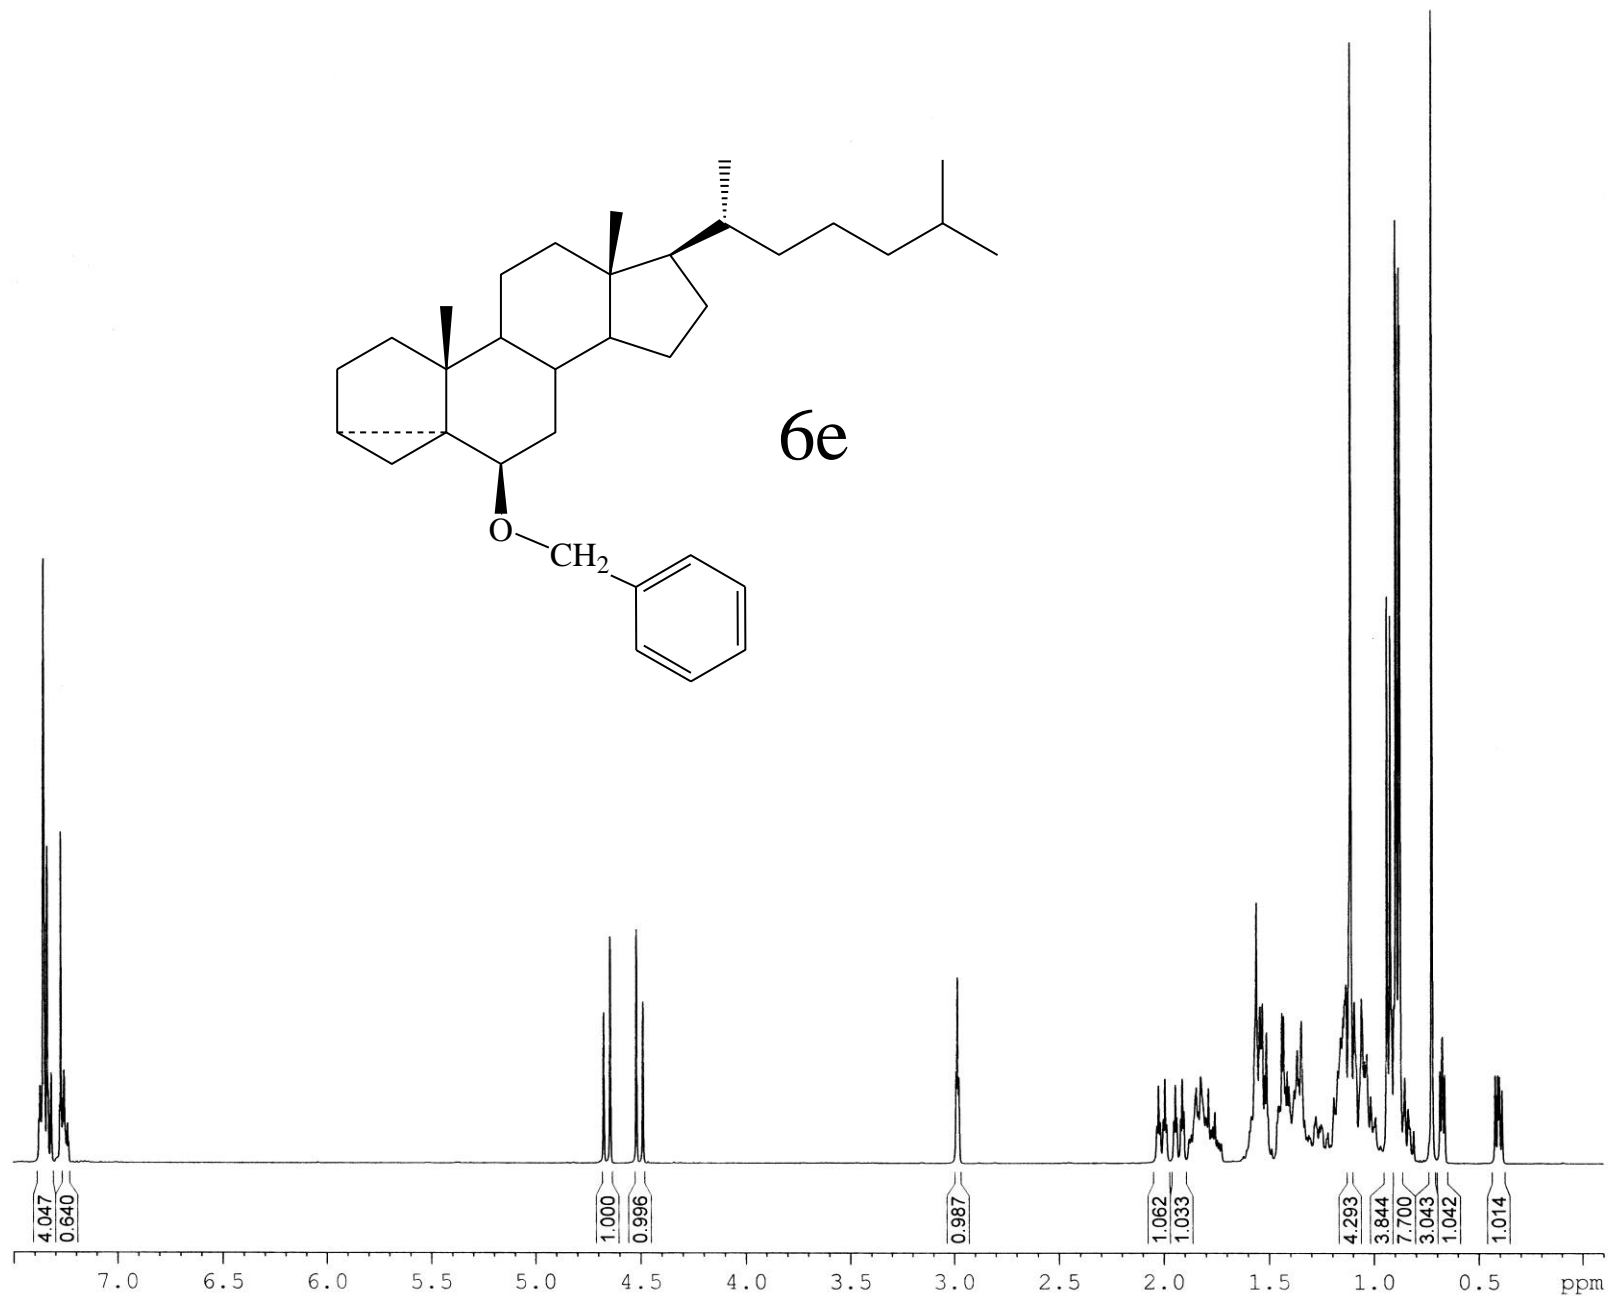

Current Data Parameters  
 NAME AT benzytowy W6f1  
 EXPNO 1  
 PROCNO 1

F2 - Acquisition Parameters  
 Date\_ 20131129  
 Time\_ 14.28  
 INSTRUM spect  
 PROBHD 5 mm PABBO BB-  
 PULPROG zg30  
 TD 65536  
 SOLVENT CDCl3  
 NS 128  
 DS 0  
 SWH 8223.685 Hz  
 FIDRES 0.125483 Hz  
 AQ 3.9846387 sec  
 RG 114  
 DW 60.800 usec  
 DE 8.00 usec  
 TE 673.2 K  
 D1 1.00000000 sec  
 TD0 1

==== CHANNEL f1 =====  
 NUC1 1H  
 P1 11.15 usec  
 PL1 -3.00 dB  
 SFO1 400.1524711 MHz

F2 - Processing parameters  
 SI 32768  
 SF 400.1500000 MHz  
 WDW GM  
 SSB 0  
 LB -0.20 Hz  
 GB 0.2  
 PC 1.00

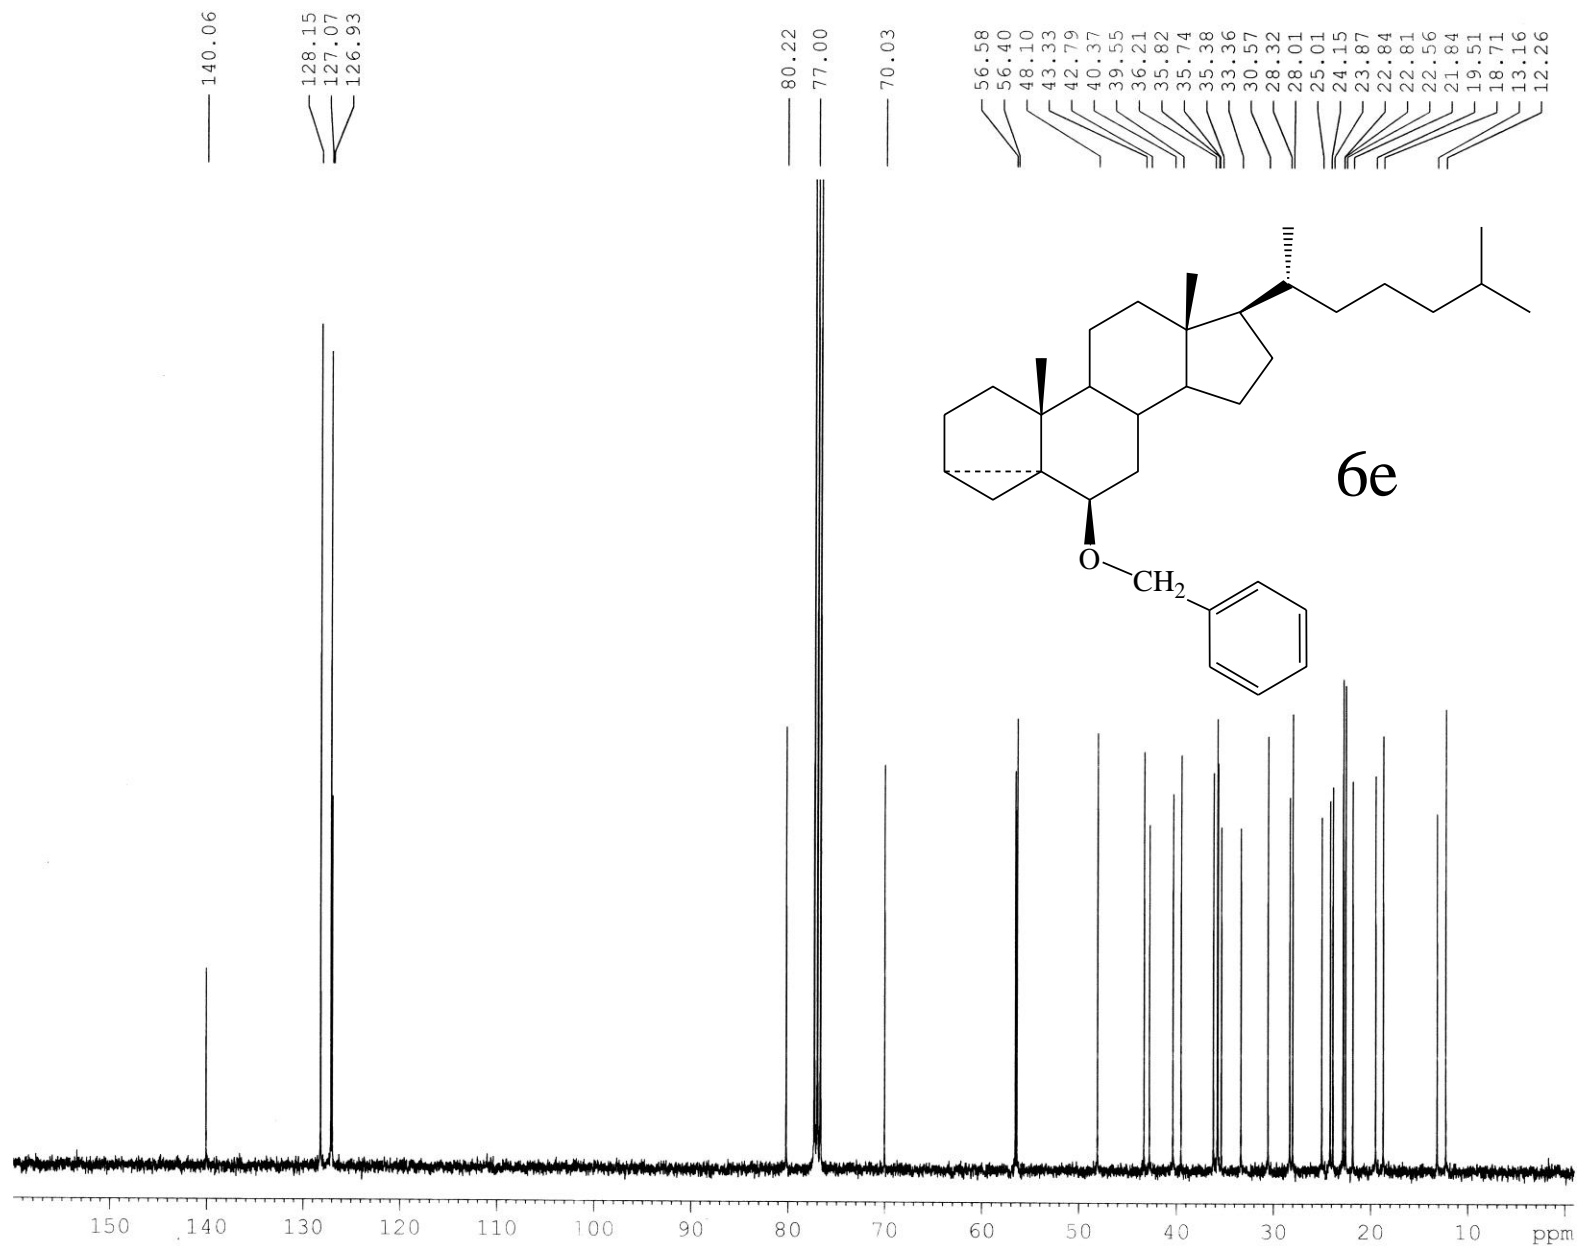

Current Data Parameters  
 NAME EM Evel8  
 EXPNO 2  
 PROCNO 1

F2 - Acquisition Parameters  
 Date\_ 20130314  
 Time\_ 15.16  
 INSTRUM spect  
 PROBHD 5 mm PABBO BB-  
 PULPROG zgpg30  
 TD 65536  
 SOLVENT CDCl3  
 NS 384  
 DS 4  
 SWH 27173.912 Hz  
 FIDRES 0.414641 Hz  
 AQ 1.2059124 sec  
 RG 2050  
 DW 18.400 usec  
 DE 6.00 usec  
 TE 303.0 K  
 D1 2.0000000 sec  
 d11 0.0300000 sec  
 DELTA 1.8999999 sec  
 TD0 1

===== CHANNEL f1 =====  
 NUC1 13C  
 P1 12.25 usec  
 PL1 -1.00 dB  
 SFO1 100.6288660 MHz

===== CHANNEL f2 =====  
 CPDPRG2 waltz16  
 NUC2 1H  
 PCPD2 100.00 usec  
 PL2 -3.00 dB  
 PL12 13.65 dB  
 PL13 18.00 dB  
 SFO2 400.1516006 MHz

F2 - Processing parameters  
 SI 32768  
 SF 100.6177986 MHz  
 WDW EM  
 SSB 0  
 LB 1.00 Hz  
 GB 0  
 EC 1.40

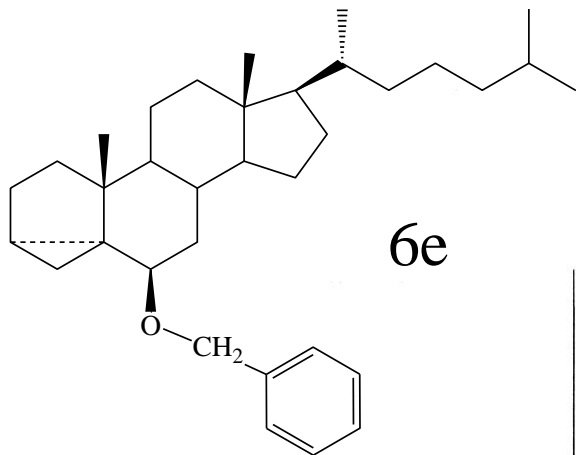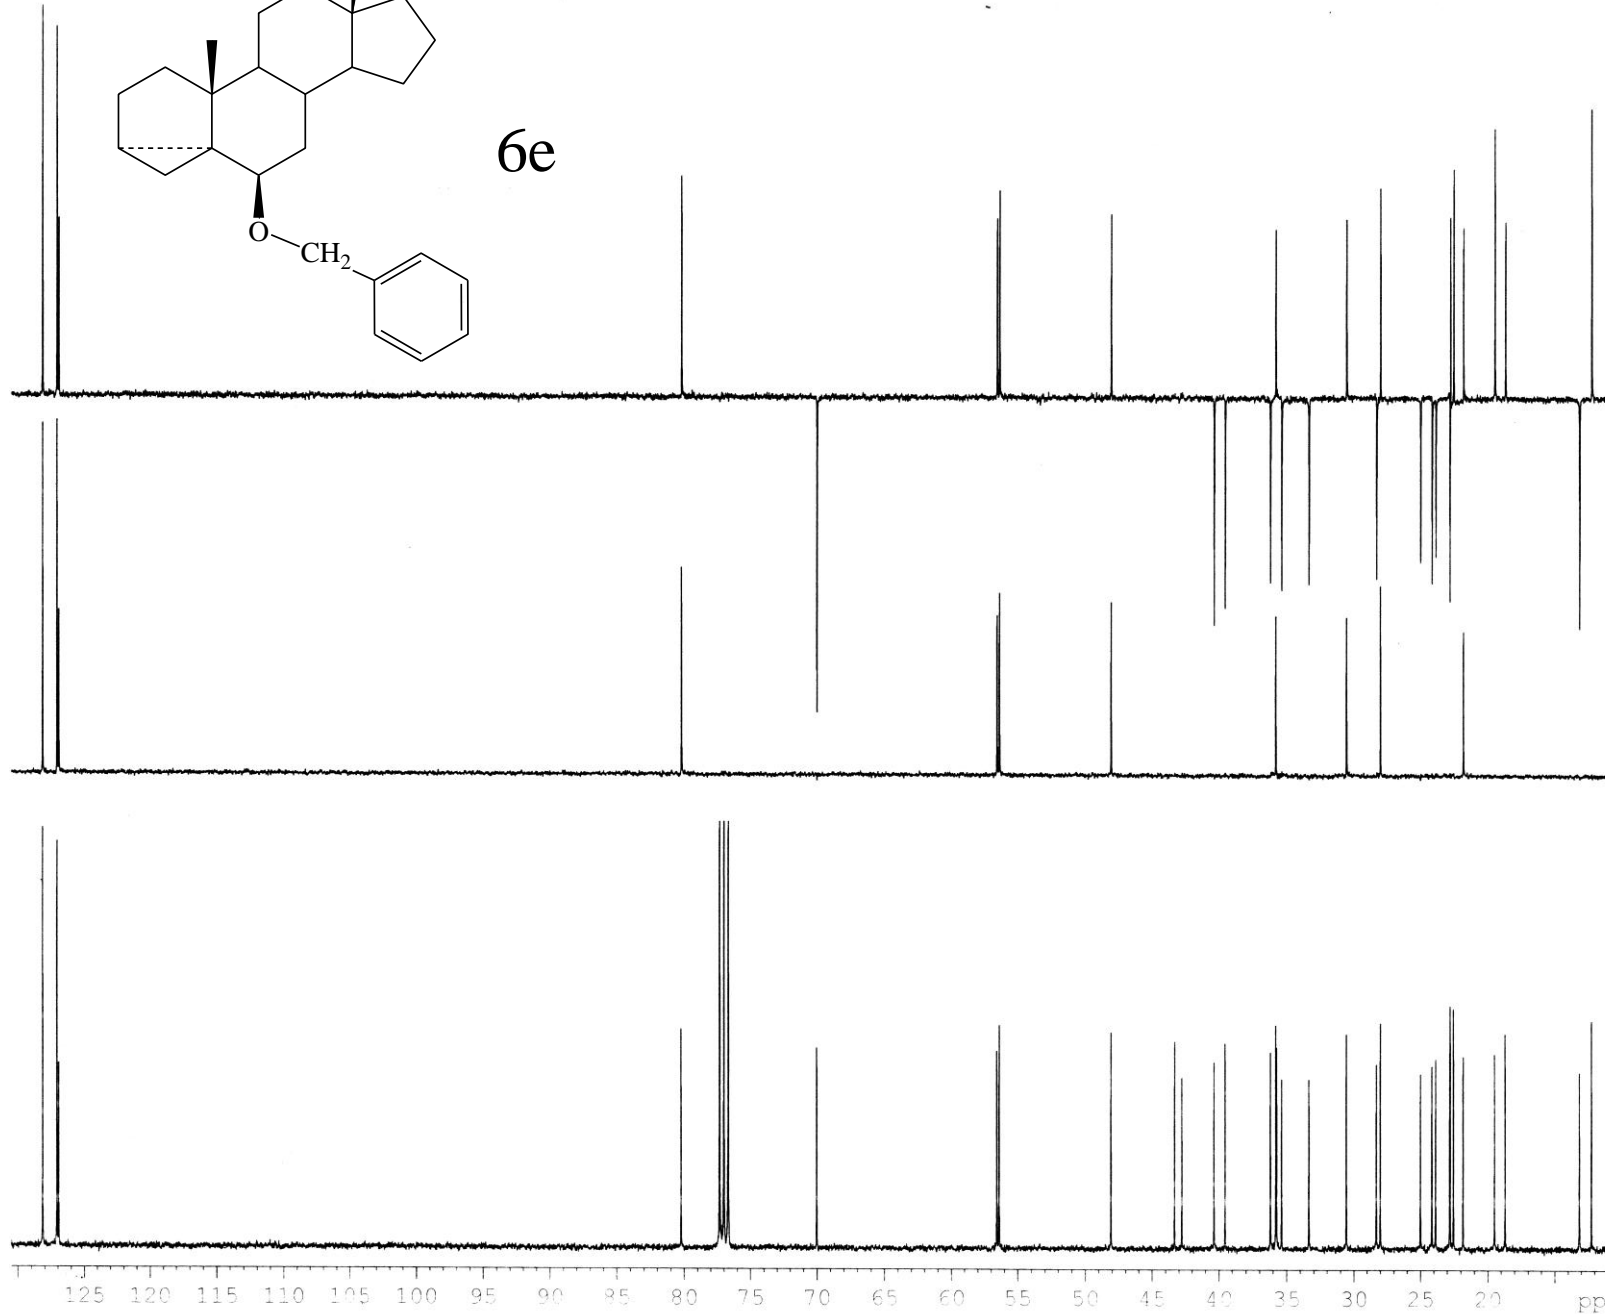

Current Data Parameters  
 NAME EM Evel8  
 EXPNO 4  
 PROCNO 1

F2 - Acquisition Parameters  
 Date 20130314  
 Time 15.53  
 INSTRUM spect  
 PROBHD 5 mm PABBO BB-  
 PULPROG dept135  
 TD 65536  
 SOLVENT CDCl3  
 NS 192  
 DS 4  
 SWH 24038.461 Hz  
 FIDRES 0.366798 Hz  
 AQ 1.3631988 sec  
 RG 2050  
 DW 20.800 usec  
 DE 6.00 usec  
 TE 303.0 K  
 CNST2 145.000000  
 D1 2.00000000 sec  
 d2 0.00344828 sec  
 d12 0.00002000 sec  
 DELTA 0.00001560 sec  
 TD0 1

==== CHANNEL f1 =====  
 NUC1 13C  
 P1 12.25 usec  
 p2 24.50 usec  
 PL1 -1.00 dB  
 SFO1 100.6278593 MHz

==== CHANNEL f2 =====  
 CPDPRG2 waltz16  
 NUC2 1H  
 P3 14.70 usec  
 p4 29.40 usec  
 PCPD2 100.00 usec  
 PL2 -3.00 dB  
 PL12 13.65 dB  
 SFO2 400.1516006 MHz

F2 - Processing parameters  
 SI 32768  
 SF 100.6177985 MHz  
 WDW EM  
 SSB 0  
 LB 1.00 Hz  
 GB 0  
 PC 1.40

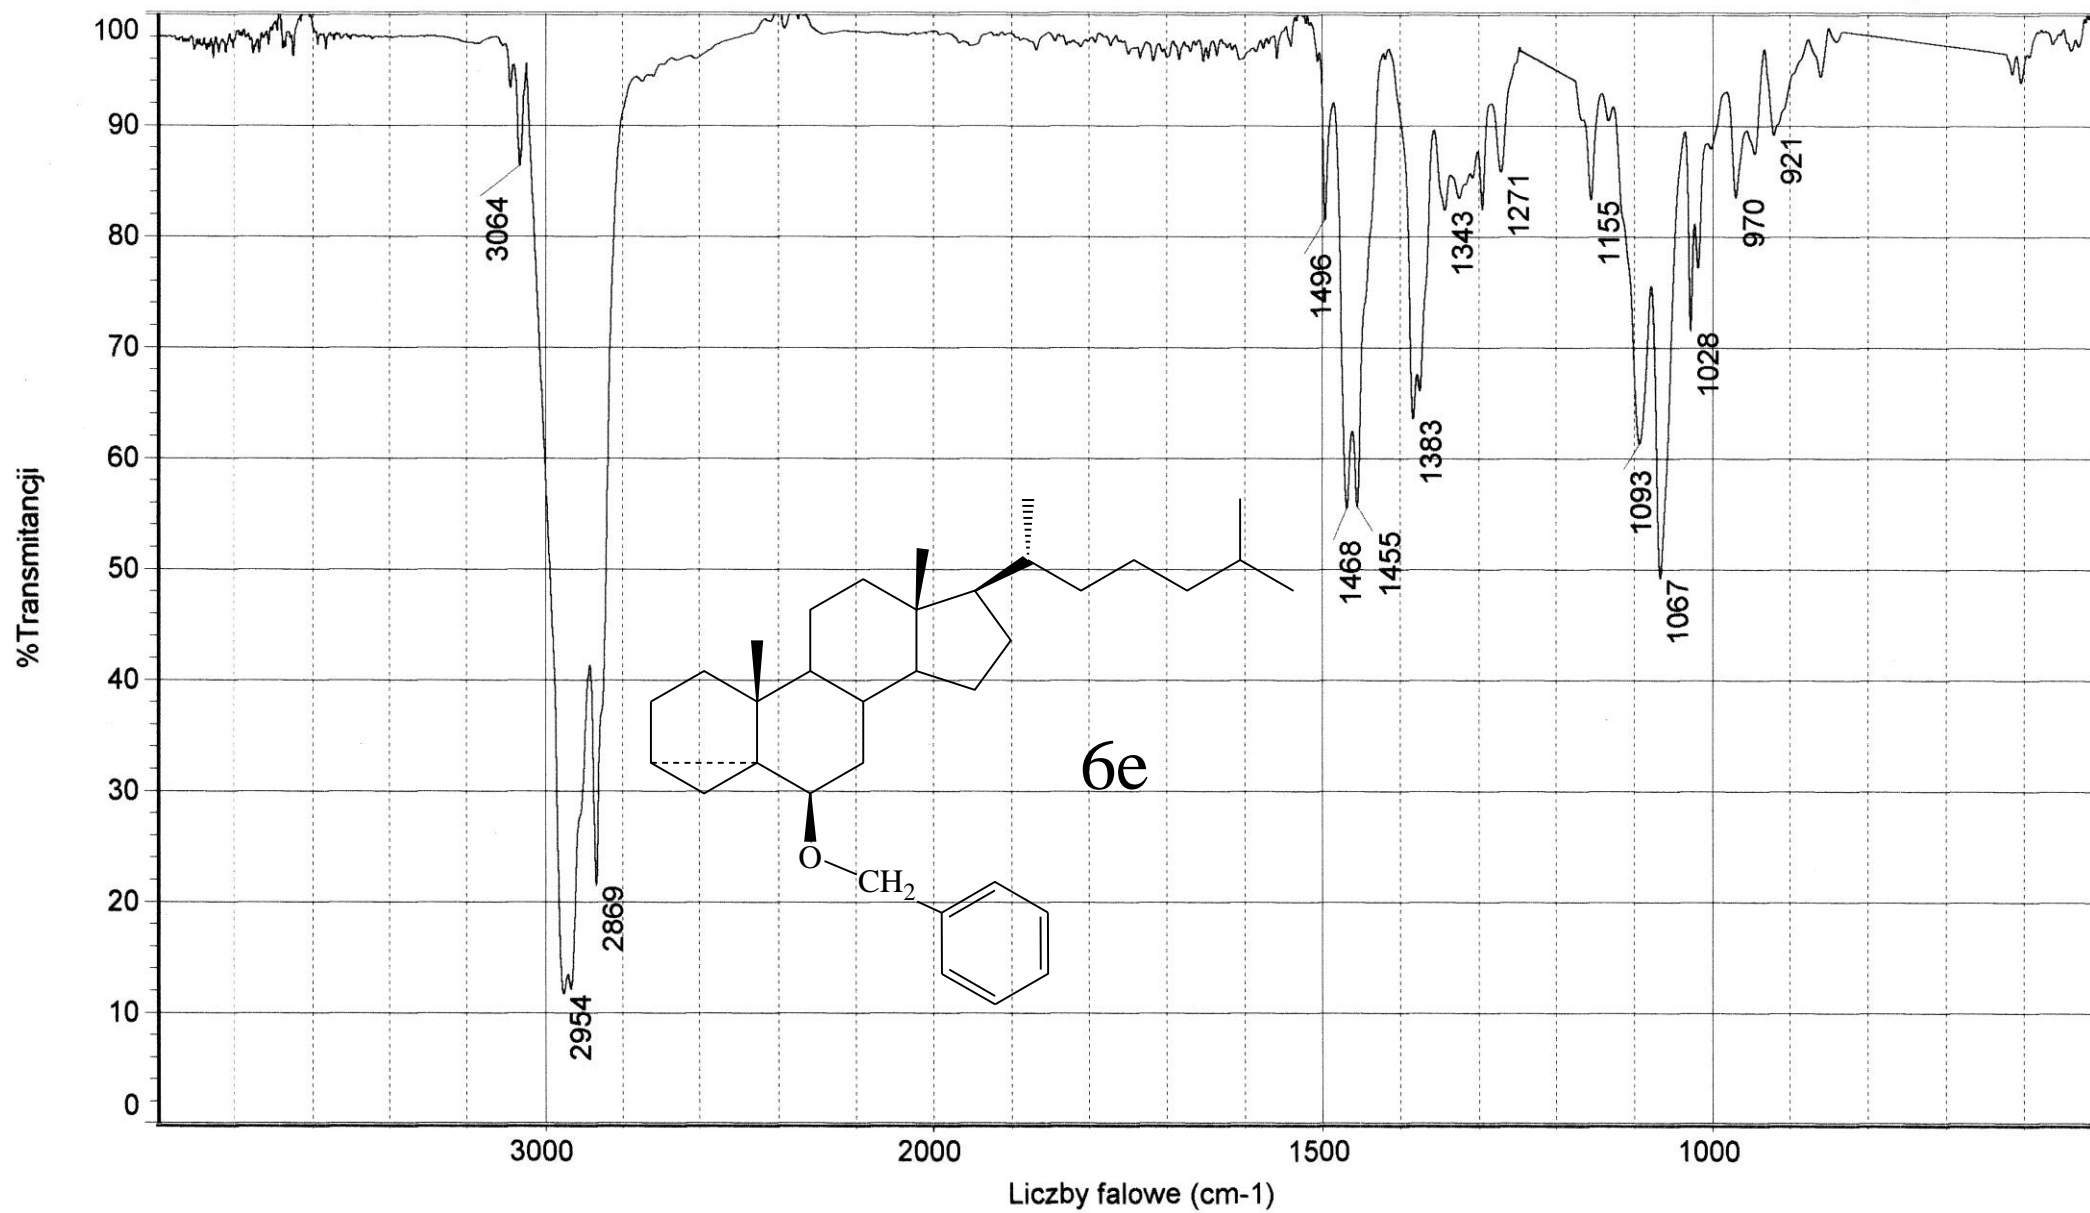

A. Tomkiel  
Eve19

AUTOSPEC

19-Mar-2013 08:51:05

ub\_at0865 35 (2.775) Cm (31:38)

Magnet EI+  
3.90e4

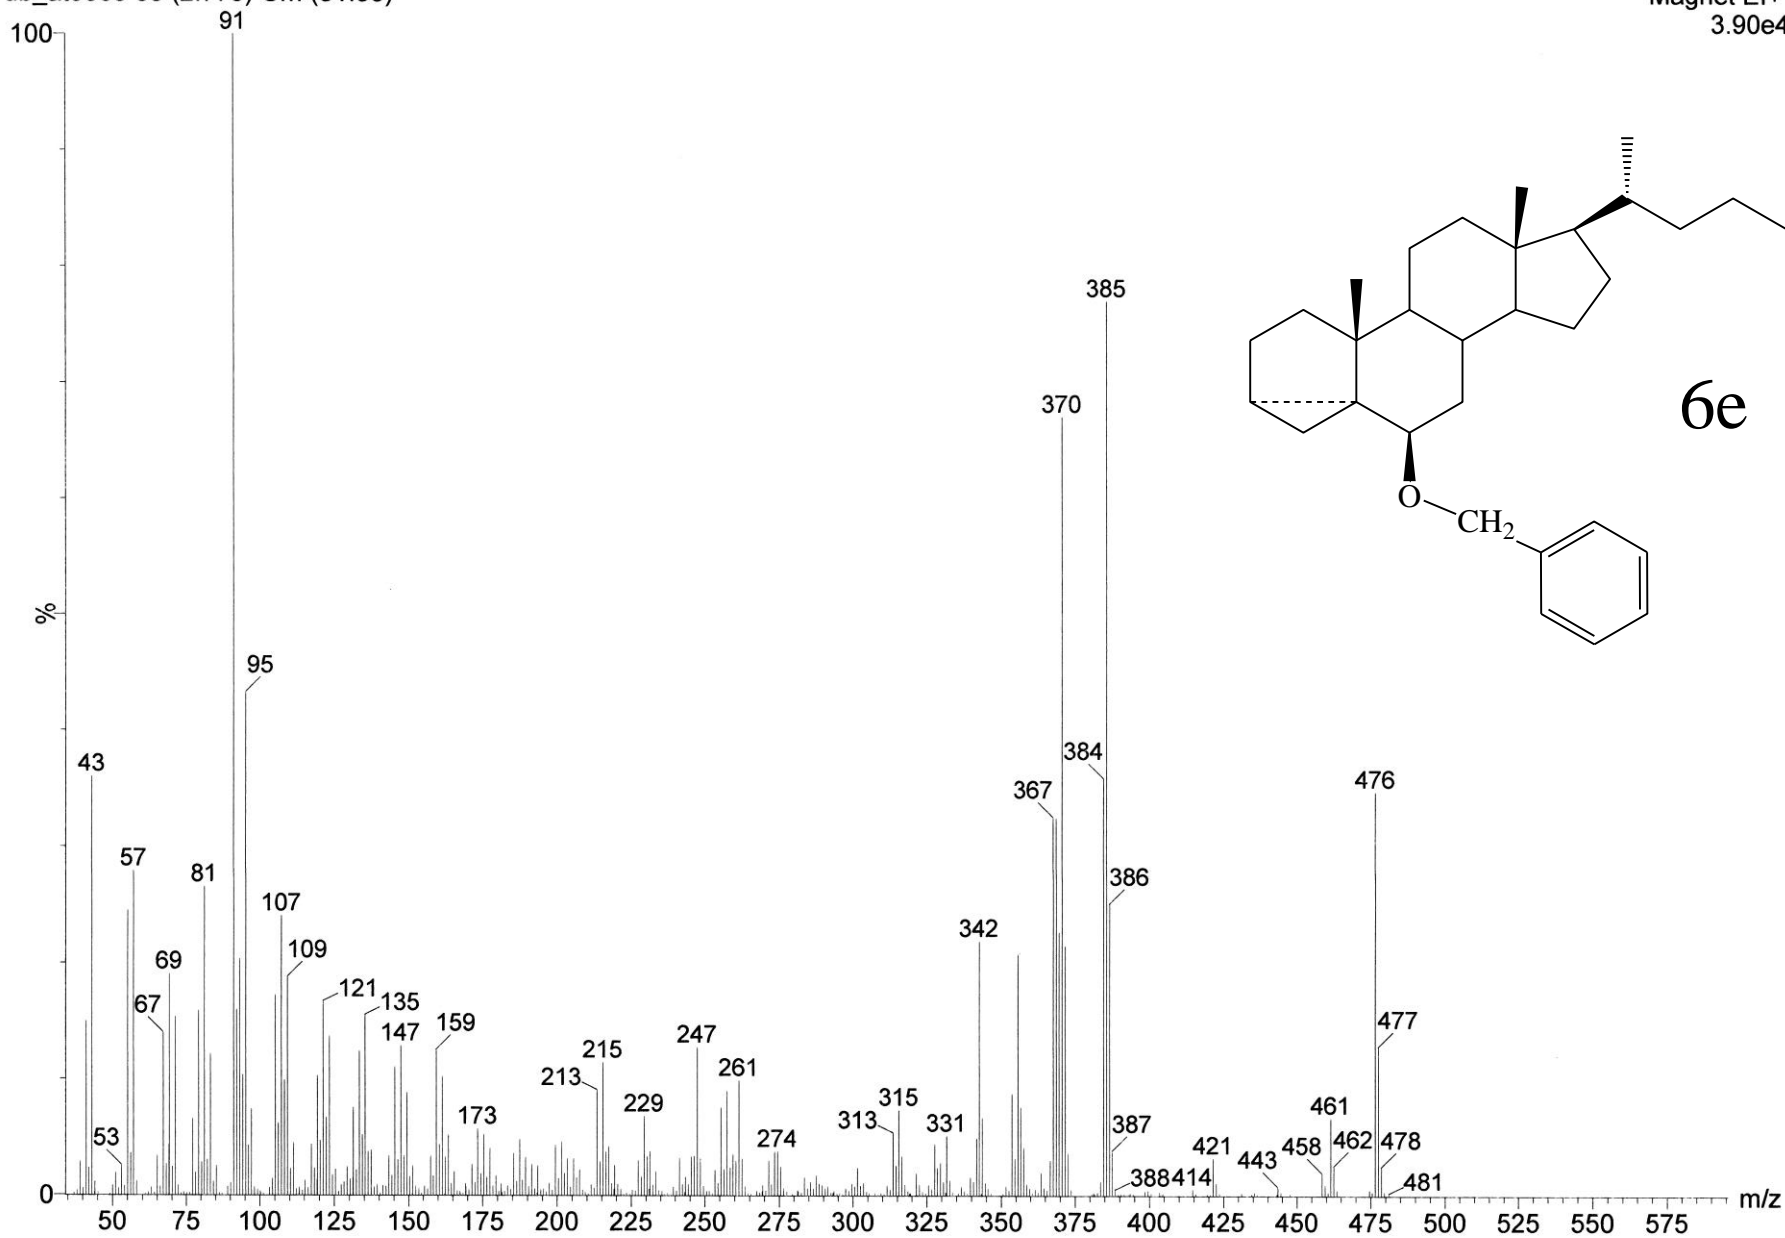

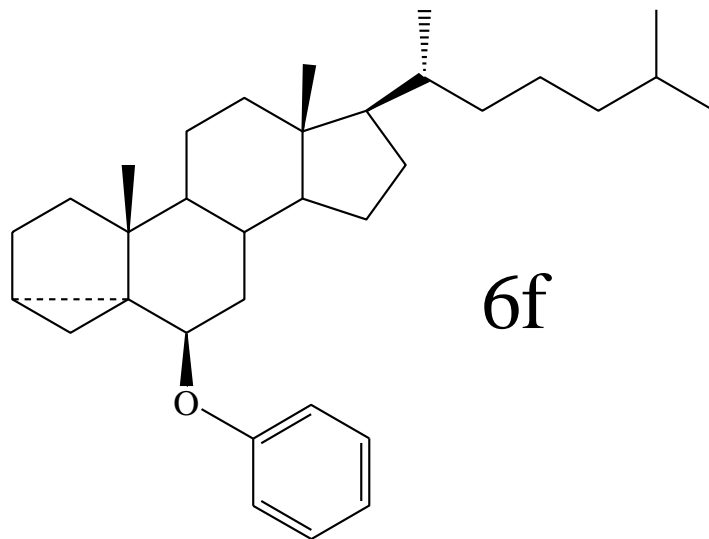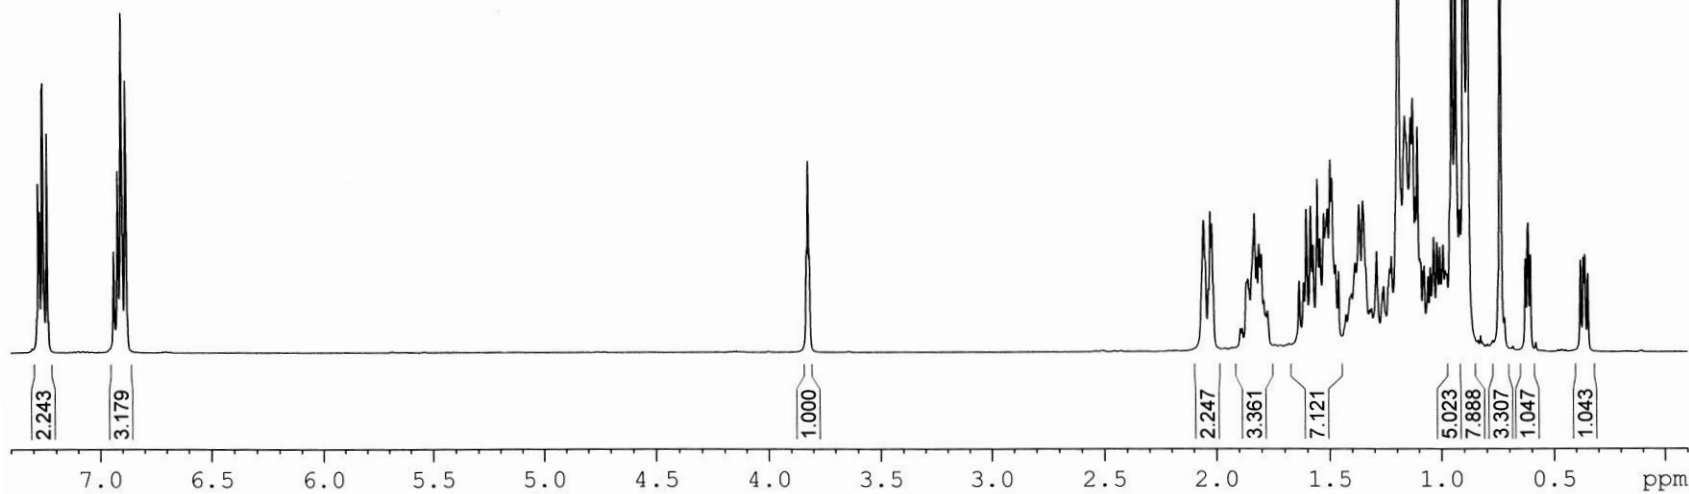

Current Data Parameters  
 NAME ABd XI-1  
 EXPNO 1  
 PROCNO 1

F2 - Acquisition Parameters  
 Date\_ 20110120  
 Time\_ 15.00  
 INSTRUM spect  
 PROBHD 5 mm PABBO BB-  
 PULPROG zg30  
 TD 65536  
 SOLVENT CDC13  
 NS 32  
 DS 0  
 SWH 8223.685 Hz  
 FIDRES 0.125483 Hz  
 AQ 3.9846387 sec  
 RG 57  
 DW 60.800 usec  
 DE 8.00 usec  
 TE 297.6 K  
 D1 1.0000000 sec  
 TD0 1

===== CHANNEL f1 =====  
 NUC1 1H  
 P1 11.15 usec  
 PL1 -3.00 dB  
 SFO1 400.1524711 MHz

F2 - Processing parameters  
 SI 32768  
 SF 400.1500000 MHz  
 WDW GM  
 SSB 0  
 LB -0.20 Hz  
 GB 0.2  
 PC 1.00



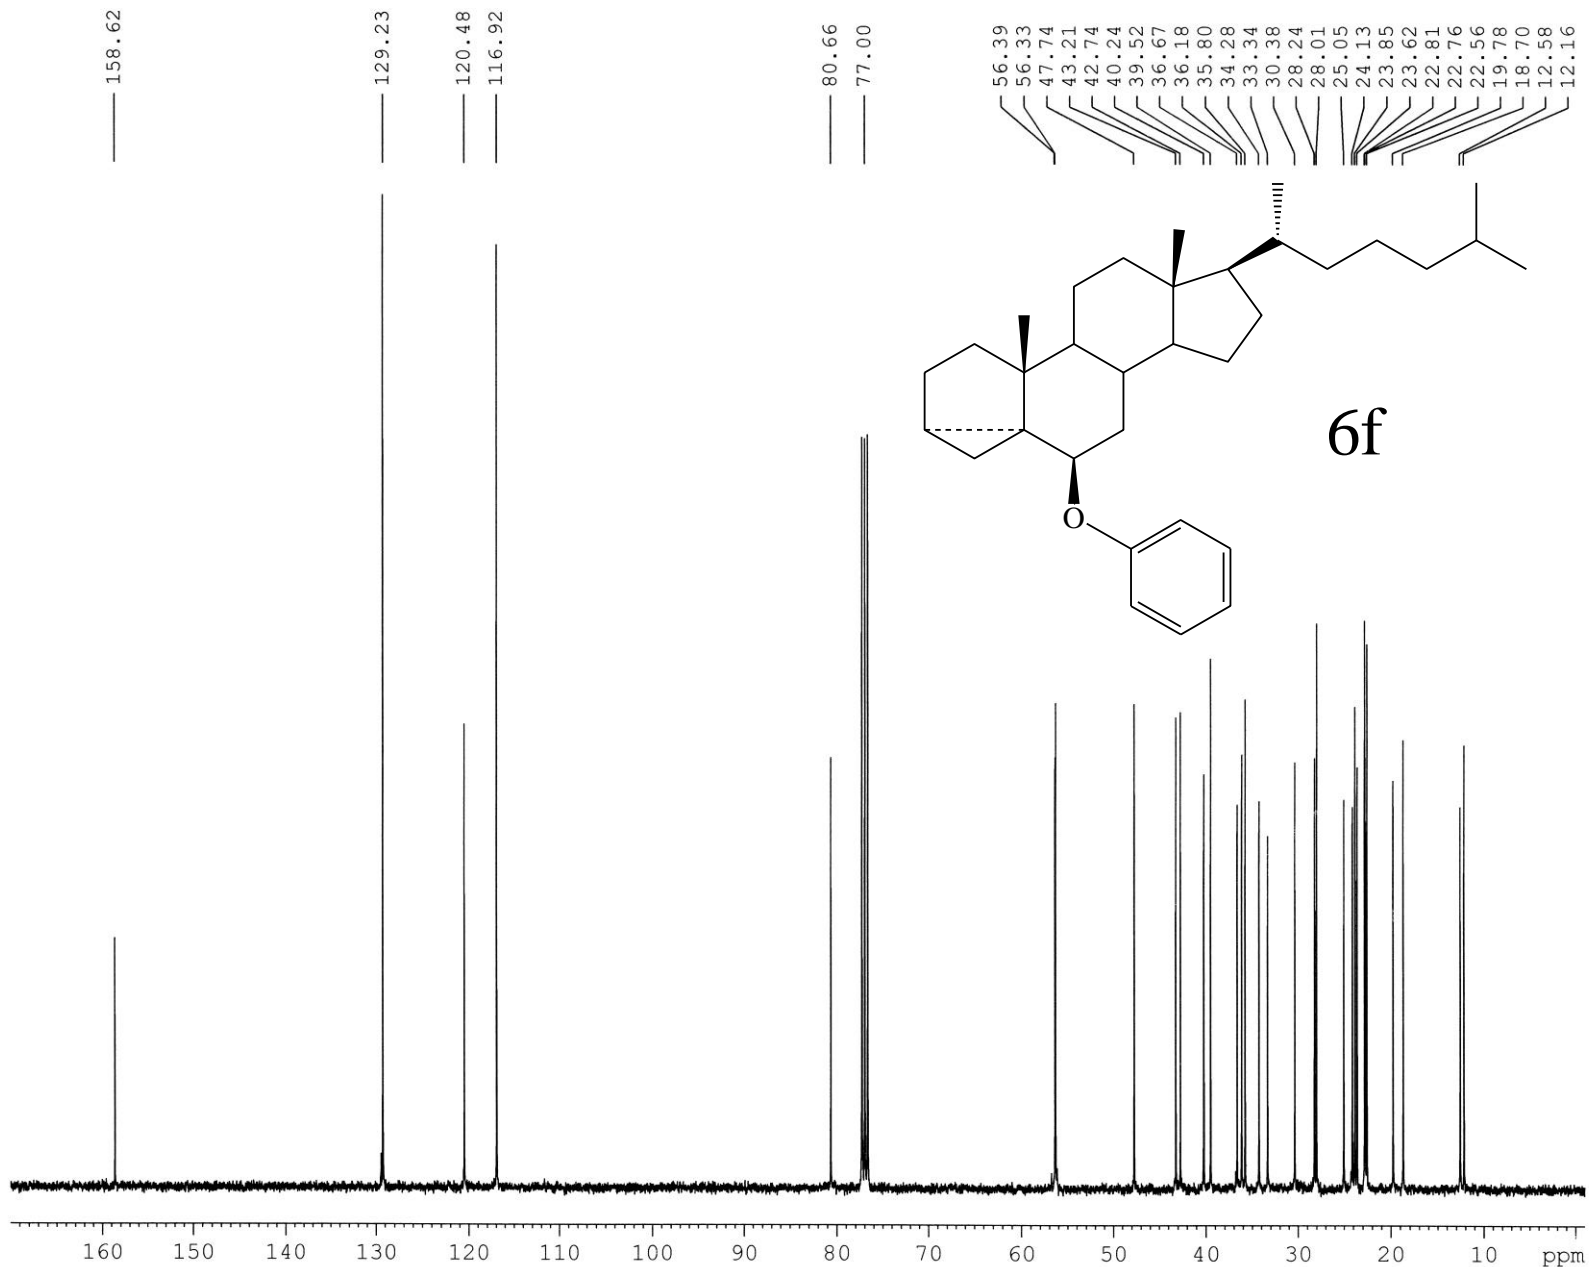

Current Data Parameters  
 NAME ABd XI-1  
 EXPNO 2  
 PROCNO 1

F2 - Acquisition Parameters  
 Date\_ 20110329  
 Time\_ 12.56  
 INSTRUM spect  
 PROBHD 5 mm PABBO BB-  
 PULPROG zgpg30  
 TD 65536  
 SOLVENT CDCl3  
 NS 576  
 DS 4  
 SWH 27173.912 Hz  
 FIDRES 0.414641 Hz  
 AQ 1.2059124 sec  
 RG 1030  
 DW 18.400 usec  
 DE 6.00 usec  
 TE 299.1 K  
 D1 2.00000000 sec  
 d11 0.03000000 sec  
 DELTA 1.89999998 sec  
 TD0 1

==== CHANNEL f1 =====  
 NUC1 13C  
 P1 11.00 usec  
 PL1 -1.00 dB  
 SFO1 100.6288660 MHz

==== CHANNEL f2 =====  
 CPDPRG2 waltz16  
 NUC2 1H  
 PCPD2 100.00 usec  
 PL2 -3.00 dB  
 PL12 13.65 dB  
 PL13 18.00 dB  
 SFO2 400.1516006 MHz

F2 - Processing parameters  
 SI 32768  
 SF 100.6178008 MHz  
 WDW EM  
 SSB 0  
 LB 1.00 Hz  
 GB 0  
 PC 0.10

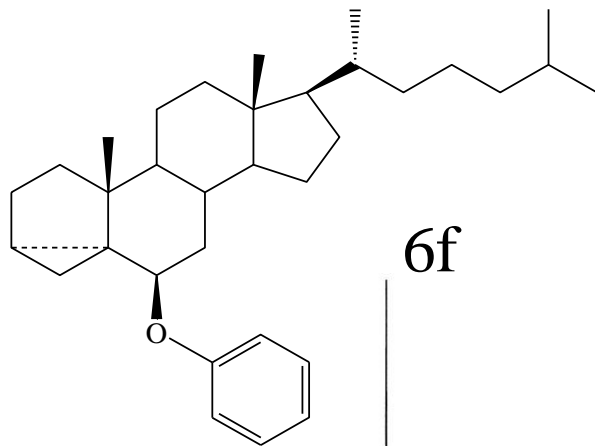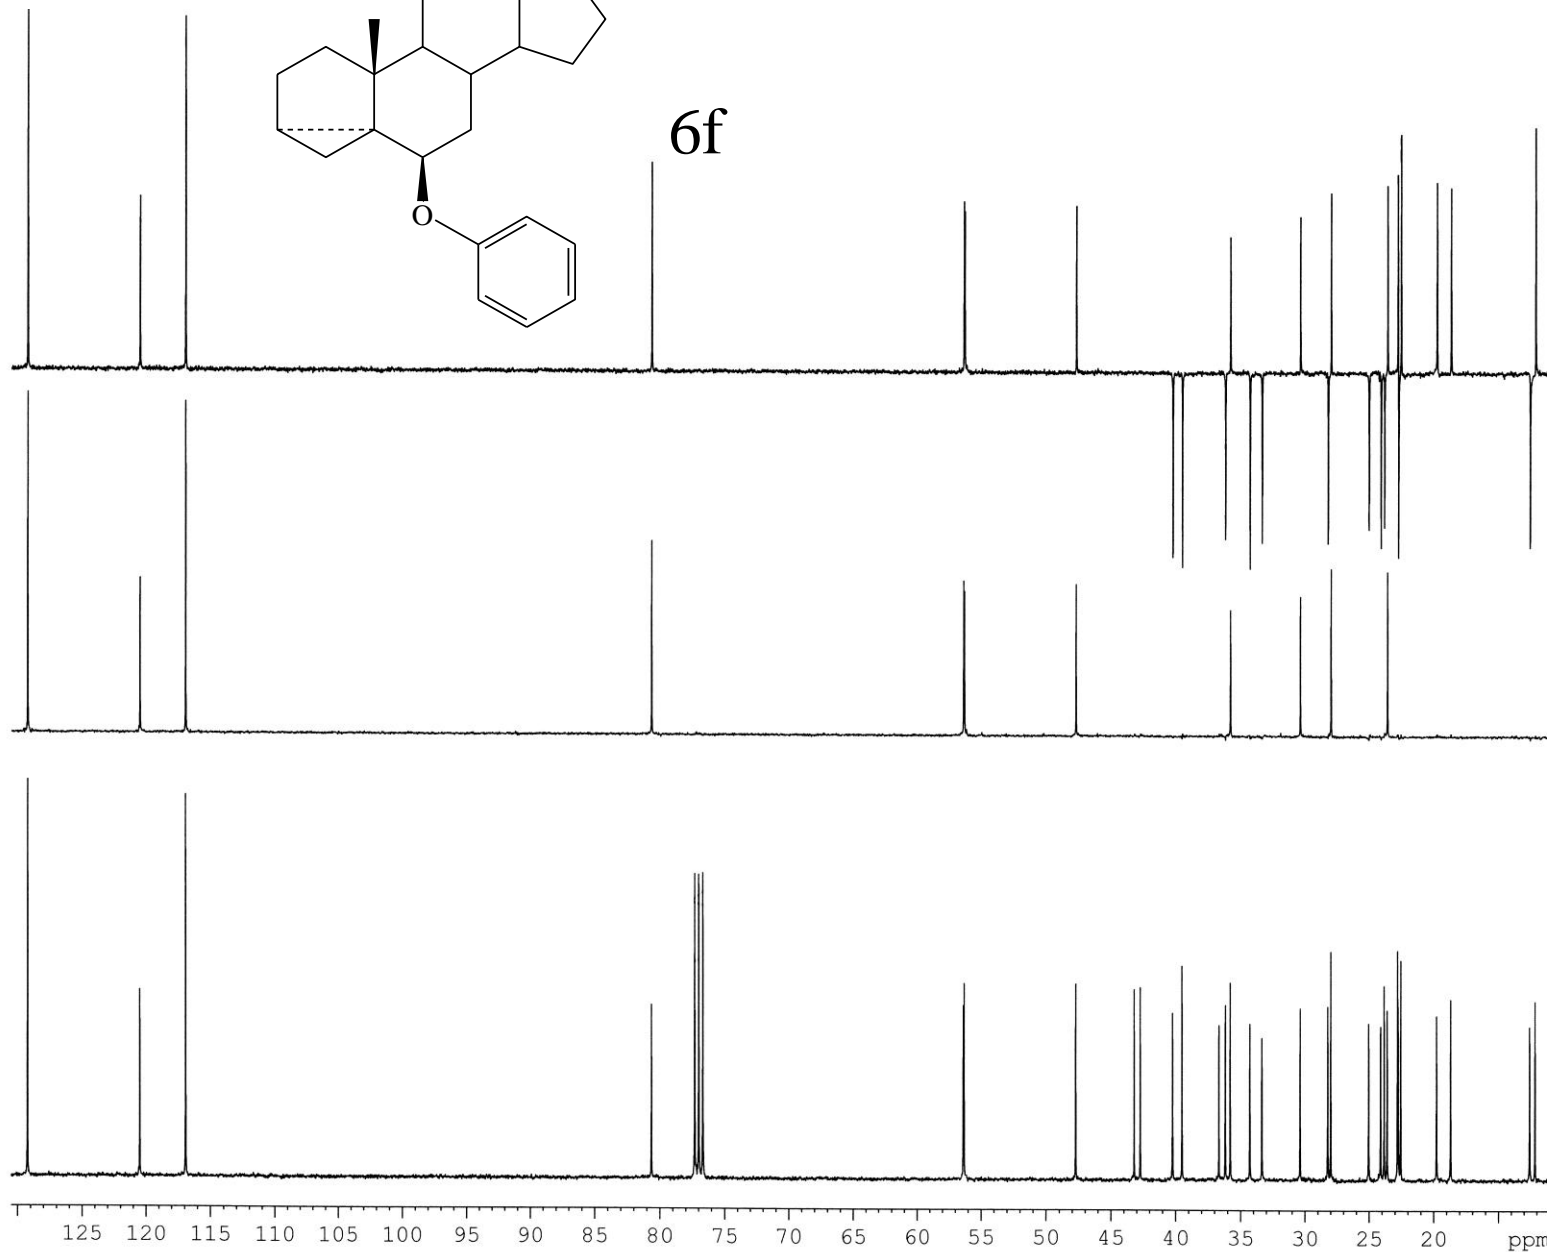

```

Current Data Parameters
NAME      ABd XI-1
EXPNO     4
PROCNO    1

F2 - Acquisition Parameters
Date_     20110329
Time      13.41
INSTRUM   spect
PROBHD    5 mm PABBO BB-
PULPROG   dept135
TD         65536
SOLVENT   CDCl3
NS         192
DS         4
SWH        24038.461 Hz
FIDRES     0.366798 Hz
AQ         1.3631988 sec
RG         2050
DW         20.800 usec
DE         6.00 usec
TE         299.7 K
CNST2     145.0000000
D1         2.00000000 sec
d2         0.00344828 sec
d12        0.00002000 sec
DELTA     0.00001401 sec
TD0        1

===== CHANNEL f1 =====
NUC1       13C
P1         11.00 usec
p2         22.00 usec
PL1        -1.00 dB
SFO1       100.6278593 MHz

===== CHANNEL f2 =====
CPDPRG2    waltz16
NUC2       1H
P3         14.70 usec
p4         29.40 usec
PCPD2     100.00 usec
PL2        -3.00 dB
PL12       13.65 dB
SFO2       400.1516006 MHz

F2 - Processing parameters
SI         32768
SF         100.6178008 MHz
WDW        EM
SSB        0
LB         1.00 Hz
GB         0
PC         0.10

```

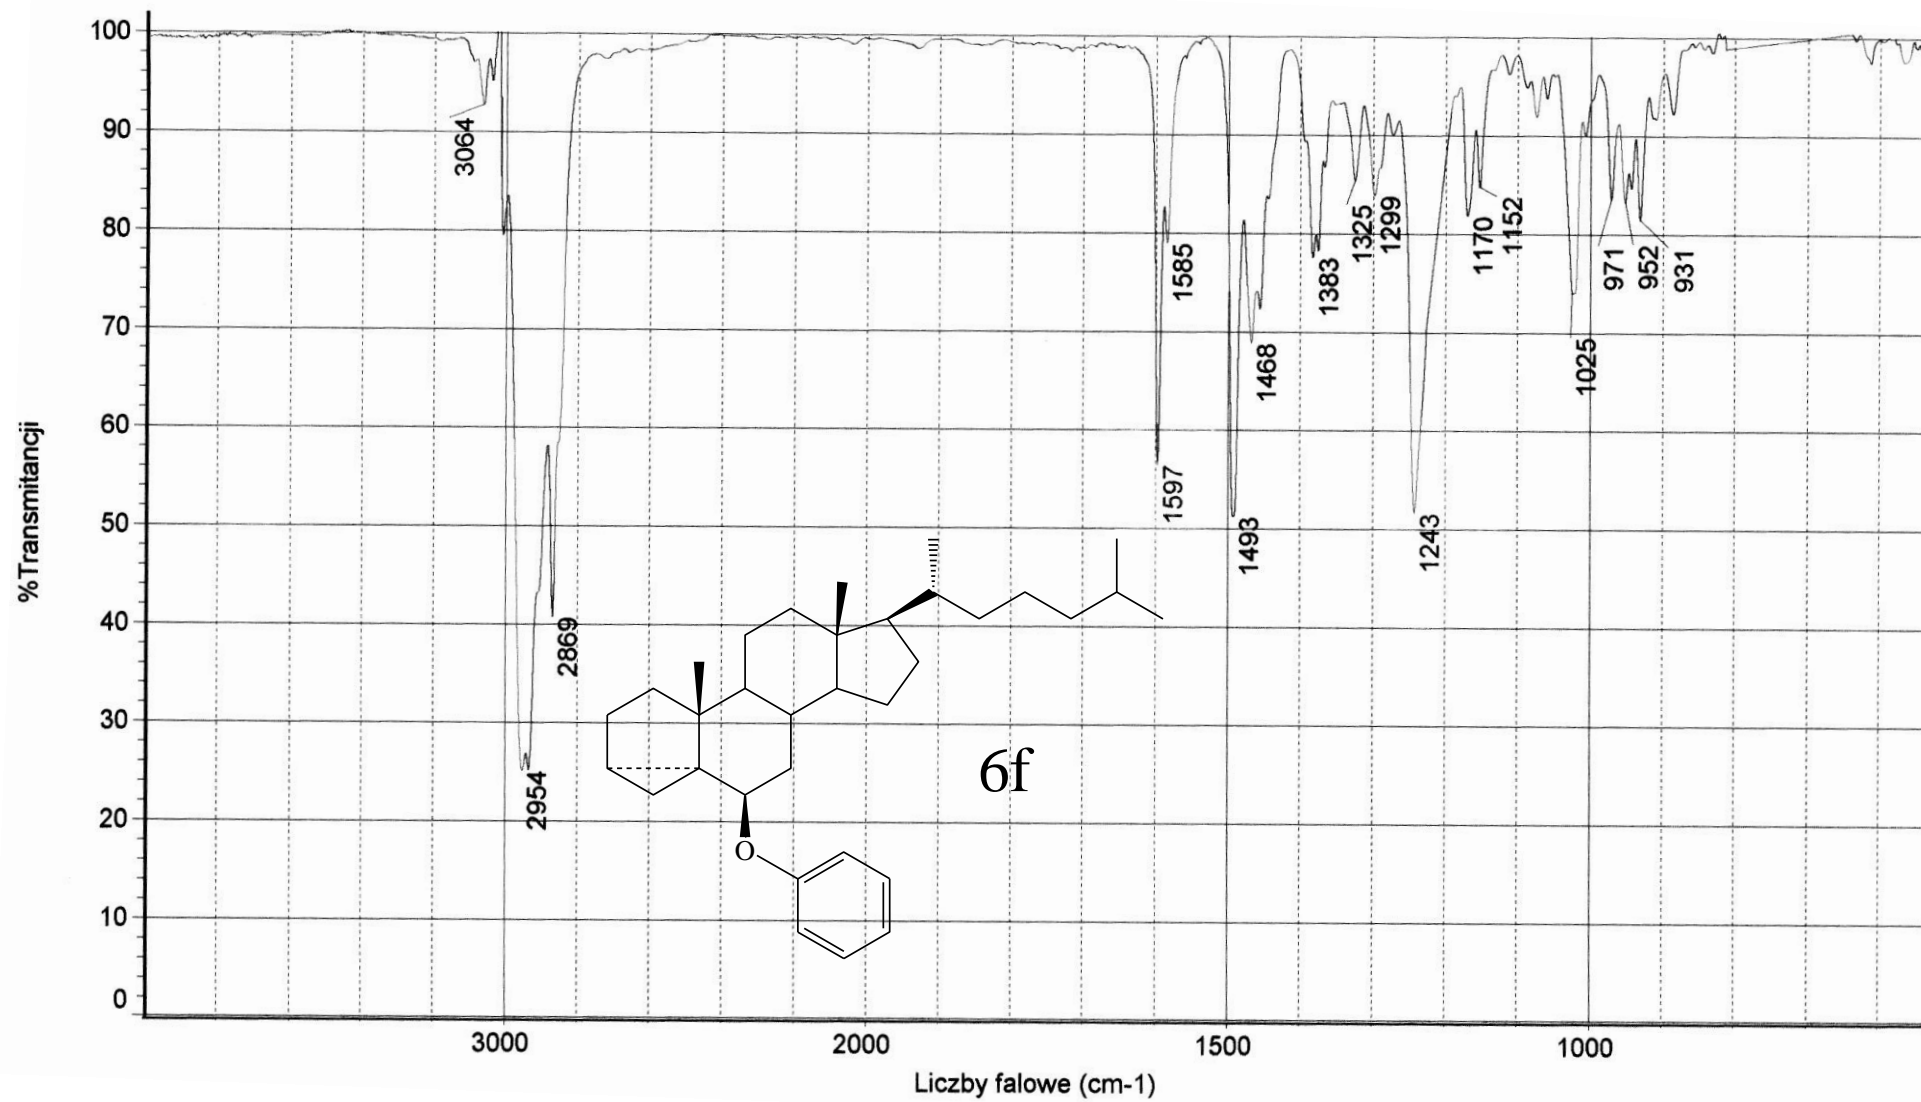

eter fenylowy w6

ub\_jm1101 70 (5.698) Cm (70:77)

Magnet EI+  
1.00e4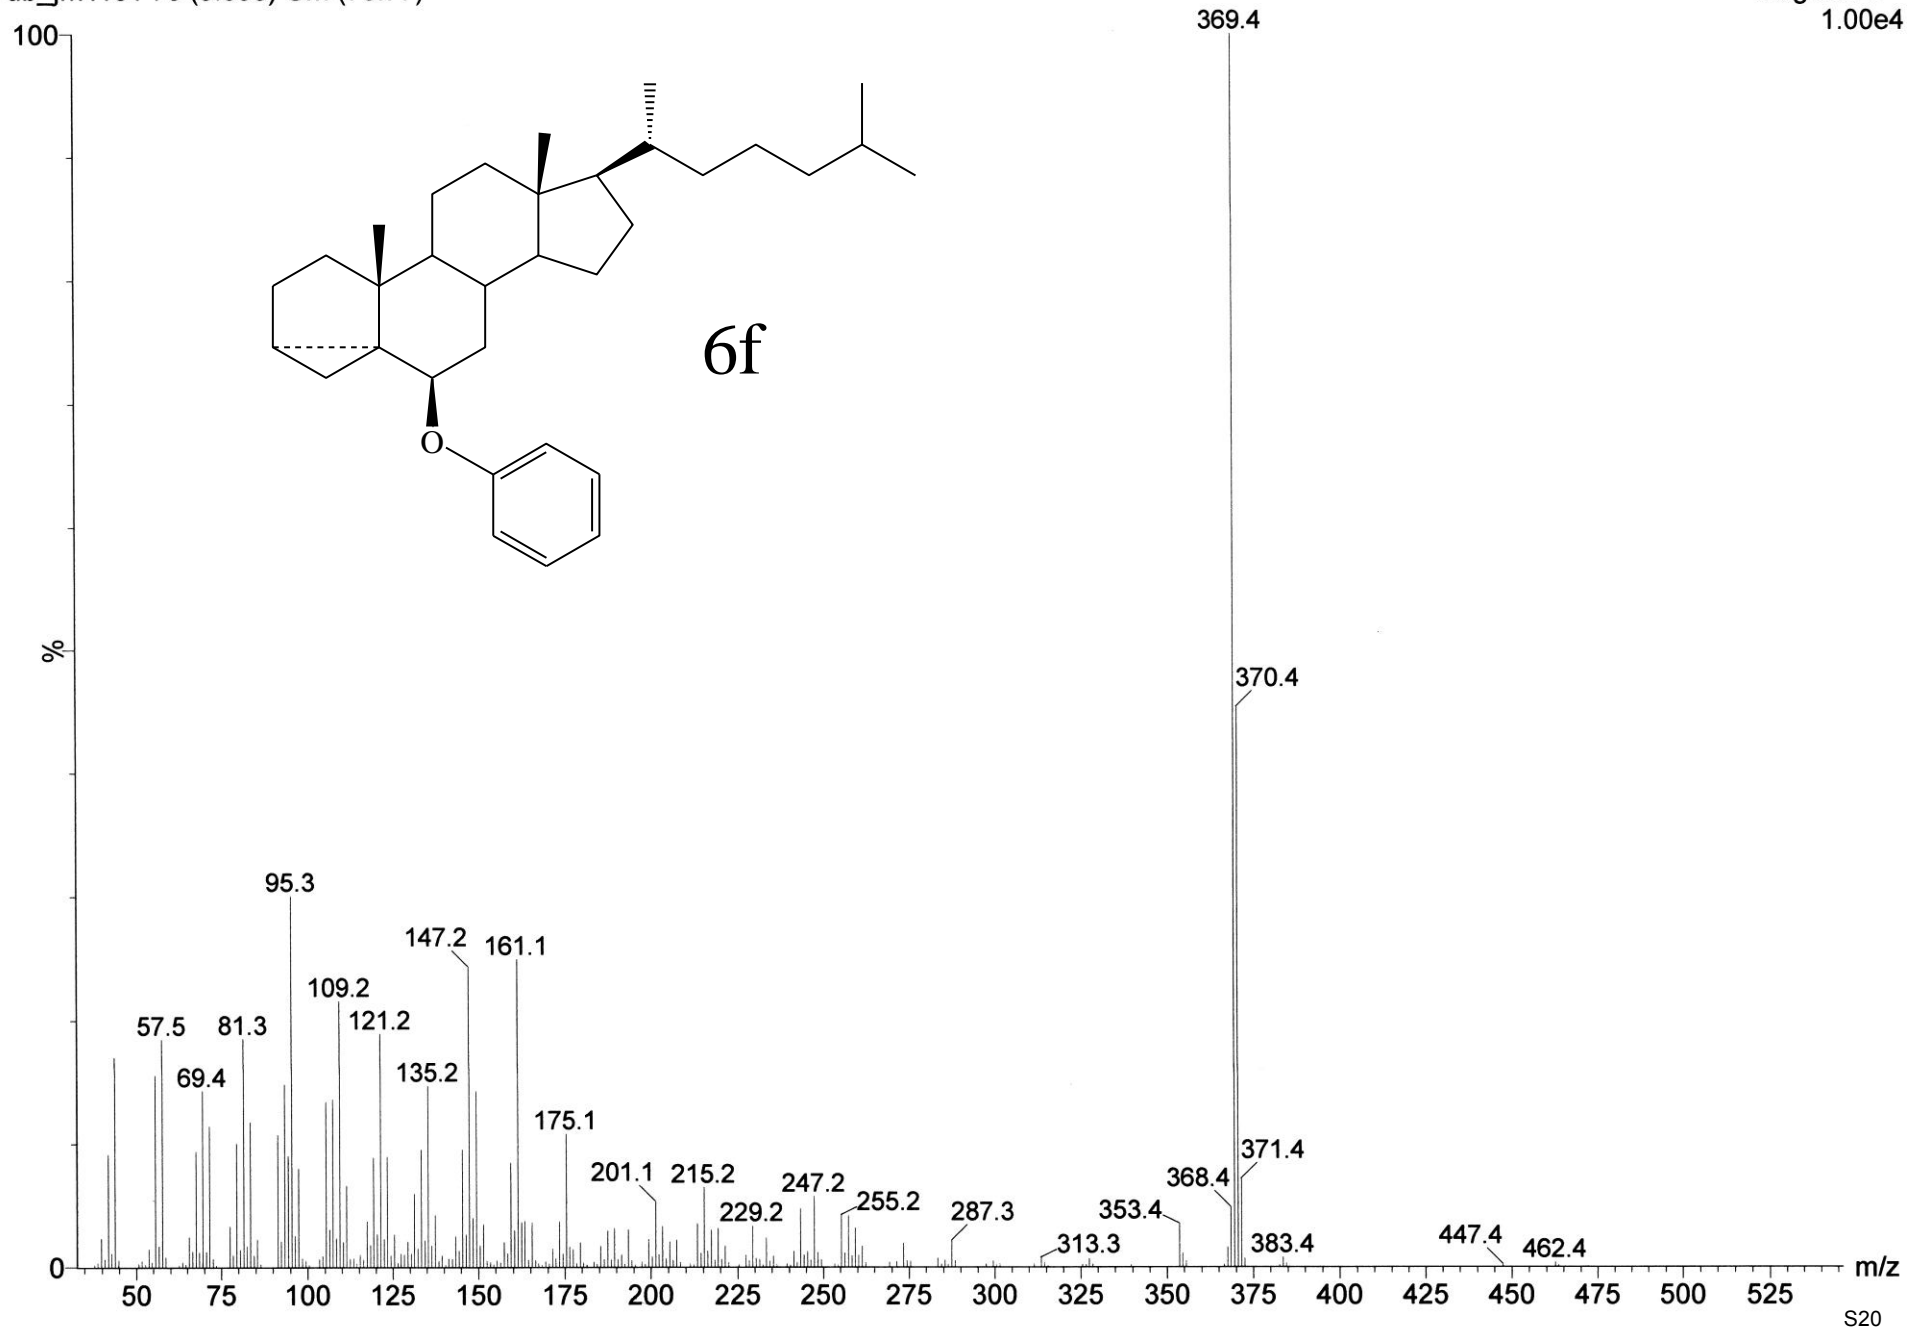

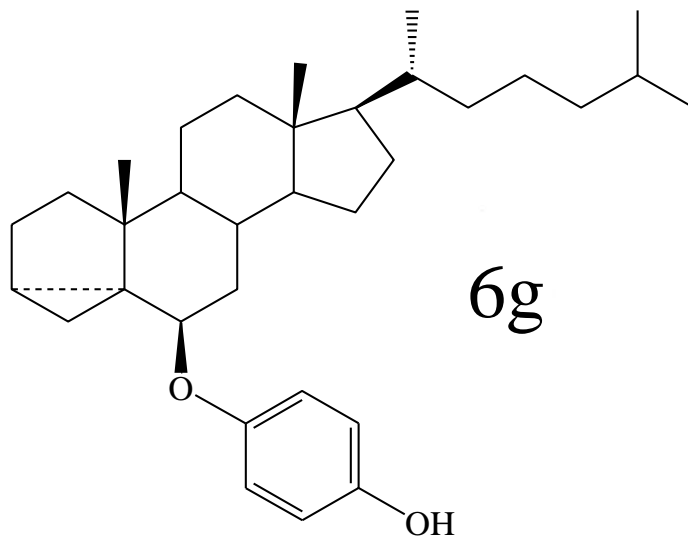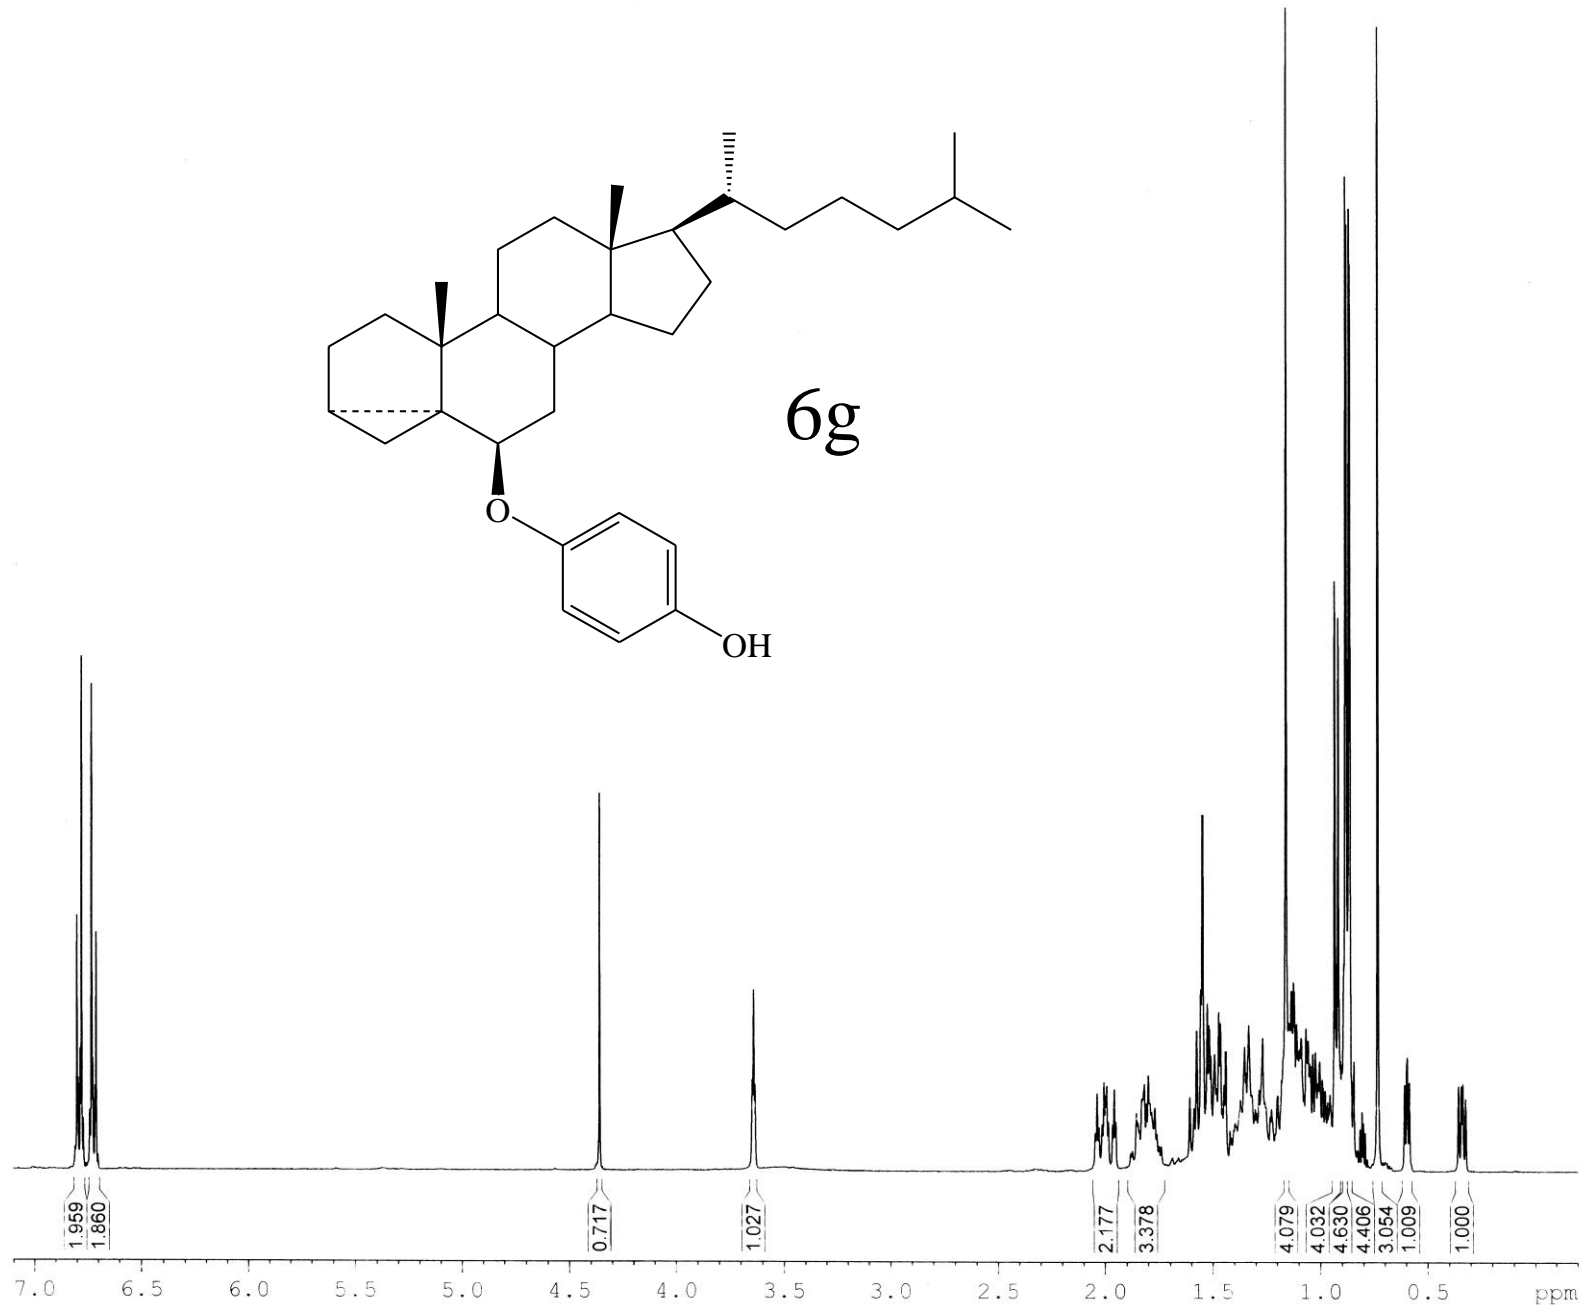

Current Data Parameters  
 NAME EM 6-et.h.chinowoy cz.  
 EXPNO 1  
 PROCNO 1

F2 - Acquisition Parameters  
 Date\_ 20130411  
 Time 11.53  
 INSTRUM spect  
 PROBHD 5 mm PABBO BB-  
 PULPROG zg30  
 TD 65536  
 SOLVENT CDCl3  
 NS 192  
 DS 0  
 SWH 8223.685 Hz  
 FIDRES 0.125483 Hz  
 AQ 3.9846387 sec  
 RG 287  
 DW 60.800 usec  
 DE 8.00 usec  
 TE 673.2 K  
 D1 1.00000000 sec  
 TD0 1

===== CHANNEL f1 =====  
 NUC1 1H  
 P1 30.00 usec  
 PL1 -3.00 dB  
 SF01 400.1524711 MHz

F2 - Processing parameters  
 SI 32768  
 SF 400.1500000 MHz  
 WDW GM  
 SSB 0  
 LB -0.20 Hz  
 GB 0.2  
 PC 1.00

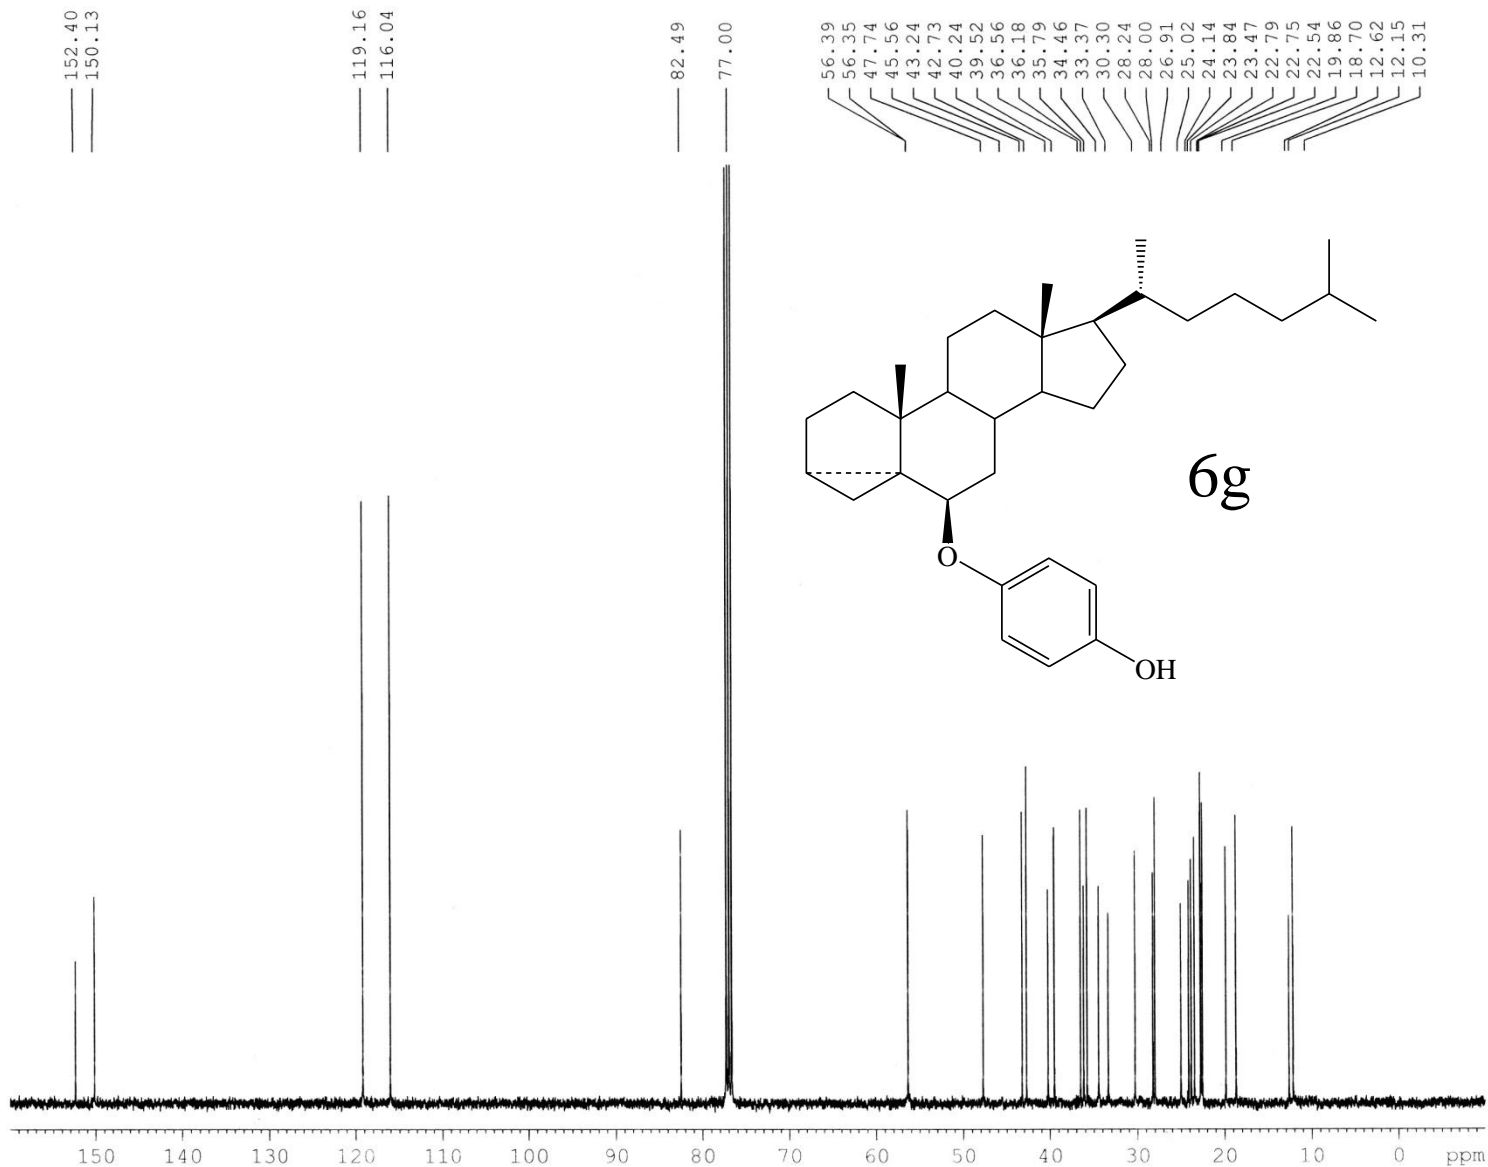

Current Data Parameters  
 NAME EM Evel9czysty  
 EXPNO 2  
 PROCNO 1

F2 - Acquisition Parameters  
 Date\_ 20130315  
 Time\_ 13.38  
 INSTRUM spect  
 PROBHD 5 mm PABBO BB-  
 PULPROG zgpg30  
 TD 65536  
 SOLVENT CDCl3  
 NS 800  
 DS 4  
 SWH 27173.912 Hz  
 FIDRES 0.414641 Hz  
 AQ 1.2059124 sec  
 RG 2050  
 DW 18.400 usec  
 DE 6.00 usec  
 TE 303.2 K  
 D1 2.00000000 sec  
 d11 0.03000000 sec  
 DELTA 1.89999998 sec  
 TD0 1

==== CHANNEL f1 =====  
 NUC1 13C  
 P1 12.25 usec  
 PL1 -1.00 dB  
 SFO1 100.6288660 MHz

==== CHANNEL f2 =====  
 CPDPRG2 waltz16  
 NUC2 1H  
 PCPD2 100.00 usec  
 PL2 -3.00 dB  
 PL12 13.65 dB  
 PL13 18.00 dB  
 SFO2 400.1516006 MHz

F2 - Processing parameters  
 SI 32768  
 SF 100.6177986 MHz  
 WDW EM  
 SSB 0  
 LB 1.00 Hz  
 GB 0  
 PC 0.10

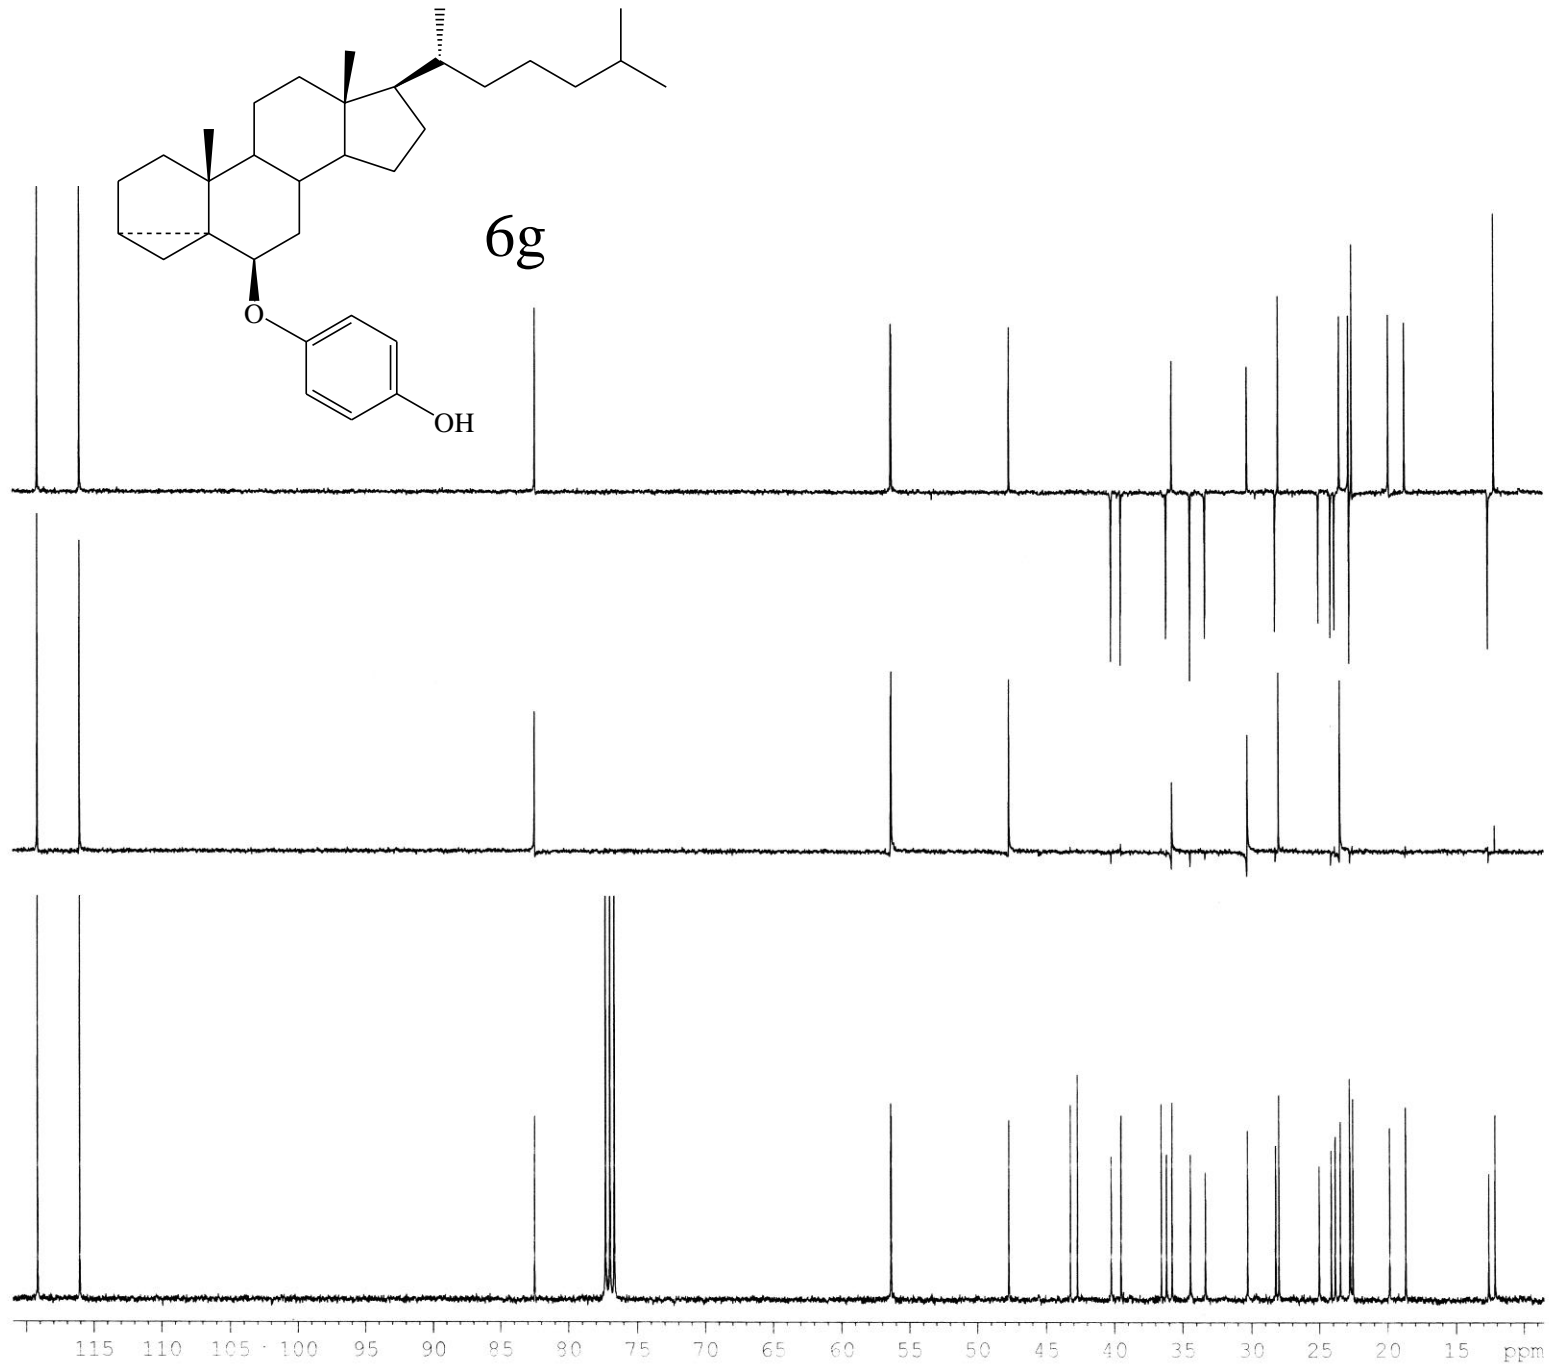

6g

```

Current Data Parameters
NAME      EM Evel9czysty
EXPNO     4
PROCNO    1

F2 - Acquisition Parameters
Date_     20130315
Time      15.06
INSTRUM   spect
PROBHD    5 mm PABBO BB-
PULPROG   dept135
TD         65536
SOLVENT   CDCl3
NS         320
DS         4
SWH        24038.461 Hz
FIDRES     0.366798 Hz
AQ         1.3631988 sec
RG         2050
DW         20.800 usec
DE         6.00 usec
TE         303.0 K
CNST2     145.0000000
D1         2.0000000 sec
d2         0.00344828 sec
dI2        0.00002000 sec
DELTA     0.00001560 sec
TD0        1

===== CHANNEL f1 =====
NUC1       13C
P1         12.25 usec
p2         24.50 usec
PL1        -1.00 dB
SFO1       100.6278593 MHz

===== CHANNEL f2 =====
CPDPRG2    waltz16
NUC2       1H
P3         14.70 usec
p4         29.40 usec
PCPD2      100.00 usec
PL2         -3.00 dB
PL12       13.65 dB
SFO2       400.1516006 MHz

F2 - Processing parameters
SI         32768
SF         100.6177987 MHz
WDW        EM
SSB        0
LB         1.00 Hz
GB         0
PC         0.10

```

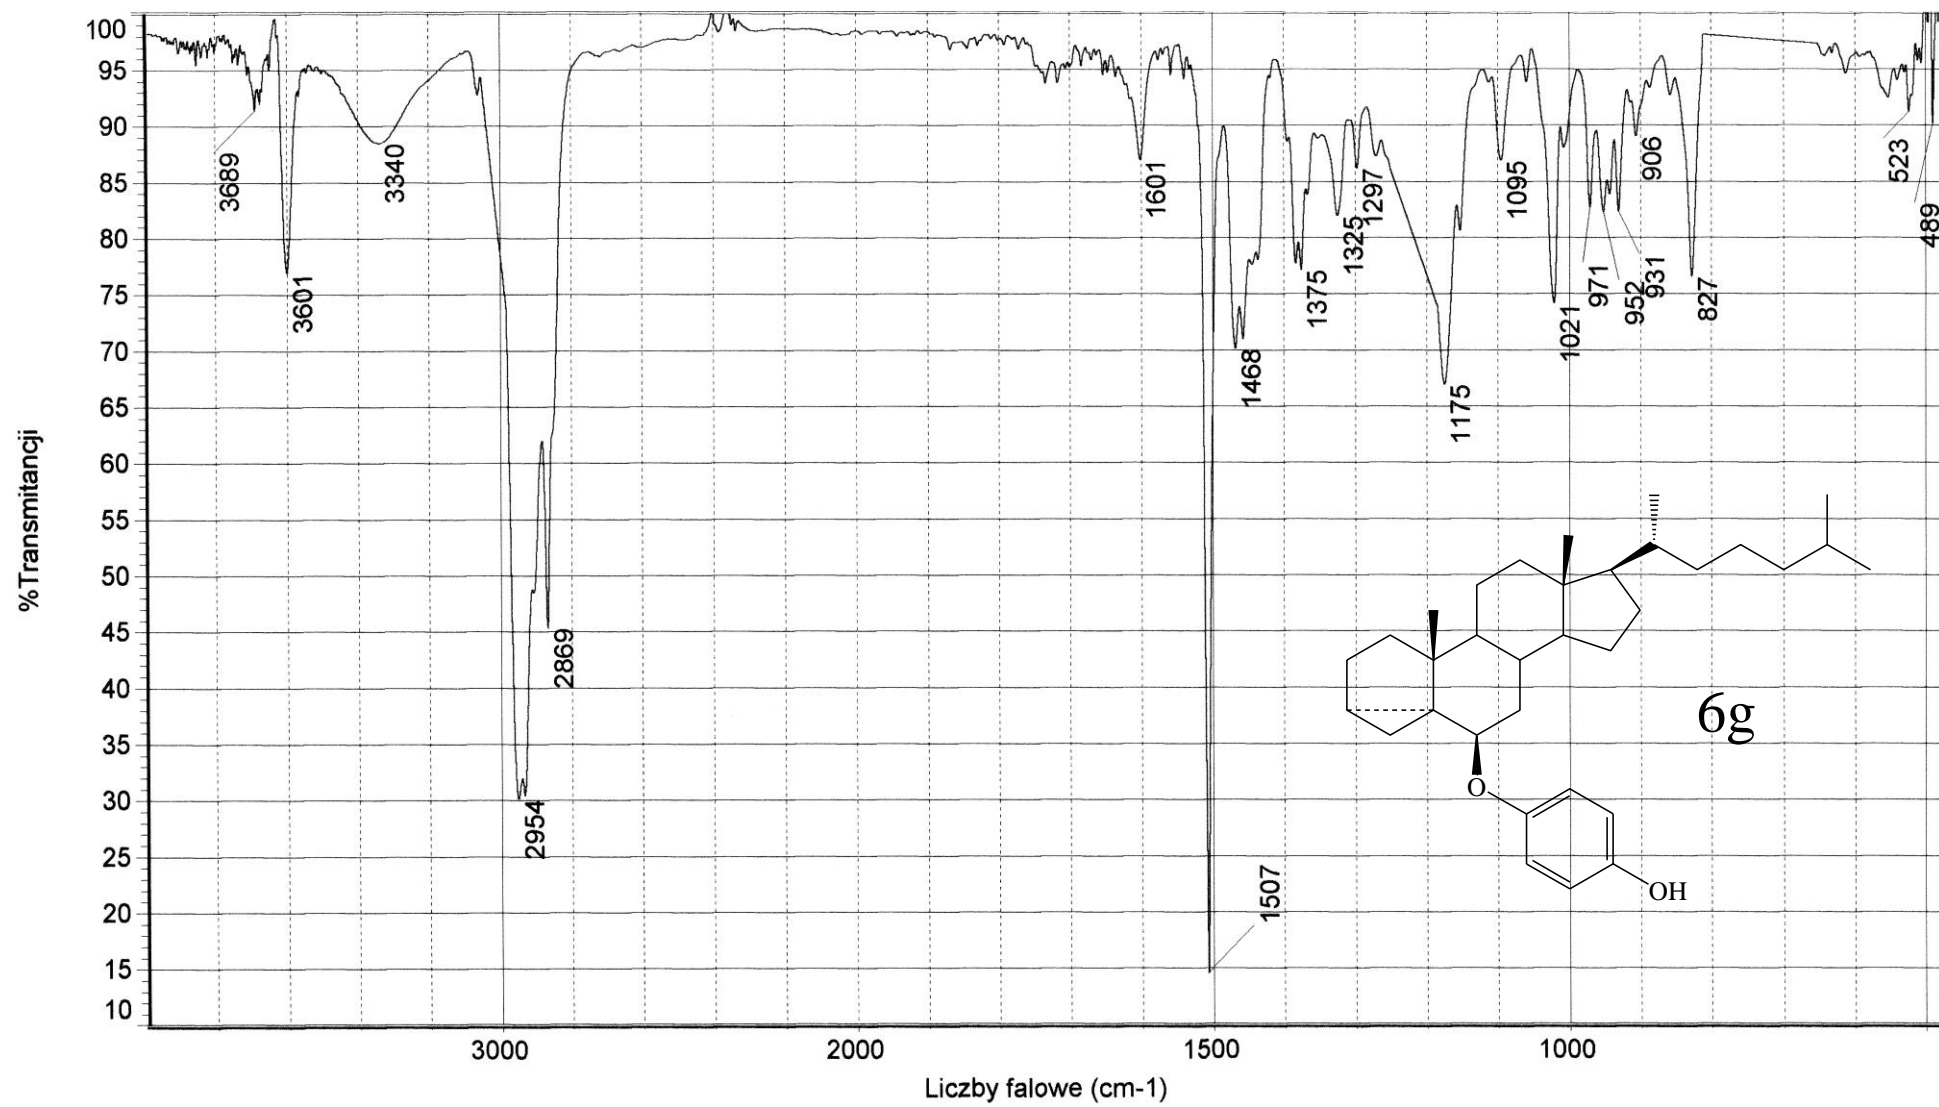



eter chinonowy w6  
ub\_jm1102 19 (1.546) Cm (19:27-3:6)

Magnet EI+  
4.43e3

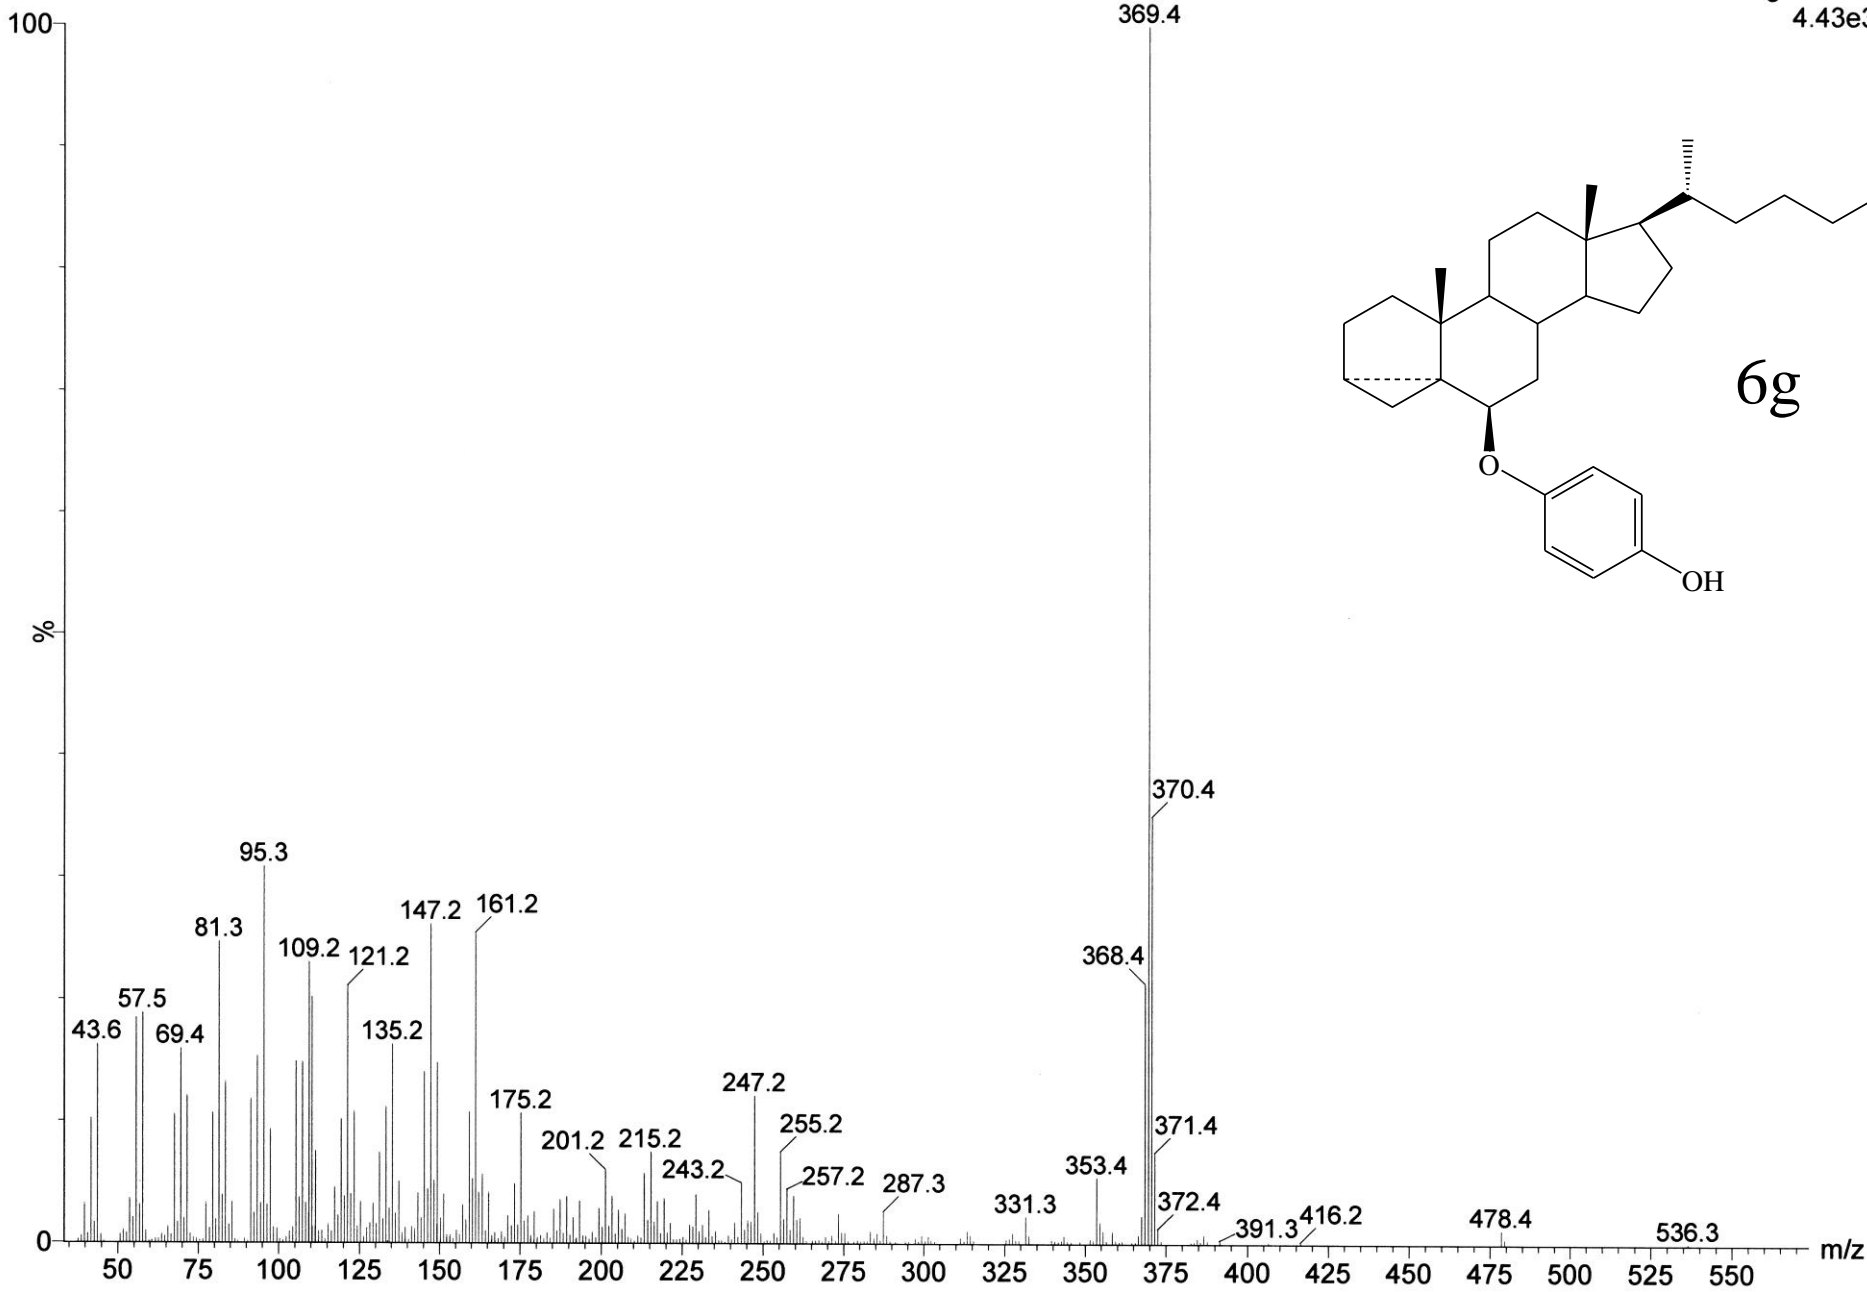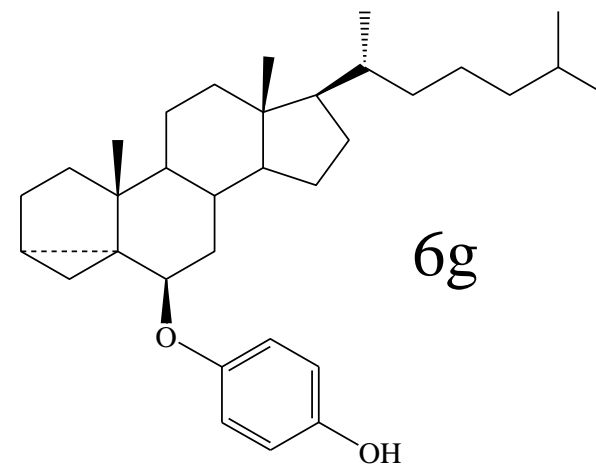

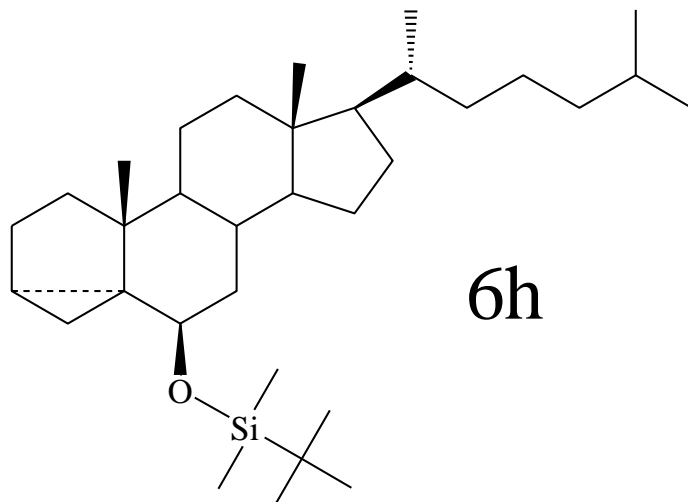

Current Data Parameters  
 NAME ABd VIII  
 EXPNO 1  
 PROCNO 1

F2 - Acquisition Parameters  
 Date\_ 20101220  
 Time\_ 11.19  
 INSTRUM spect  
 PROBHD 5 mm PABBO BB-  
 PULPROG zg30  
 TD 65536  
 SOLVENT CDCl3  
 NS 128  
 DS 0  
 SWH 8223.685 Hz  
 FIDRES 0.125483 Hz  
 AQ 3.9846387 sec  
 RG 228  
 DW 60.800 usec  
 DE 8.00 usec  
 TE 299.4 K  
 D1 1.00000000 sec  
 TD0 1

==== CHANNEL f1 =====  
 NUC1 1H  
 P1 11.15 usec  
 PL1 -3.00 dB  
 SFO1 400.1524711 MHz

F2 - Processing parameters  
 SI 32768  
 SF 400.1500000 MHz  
 WDW GM  
 SSB 0  
 LB -0.20 Hz  
 GB 0.2  
 PC 1.00

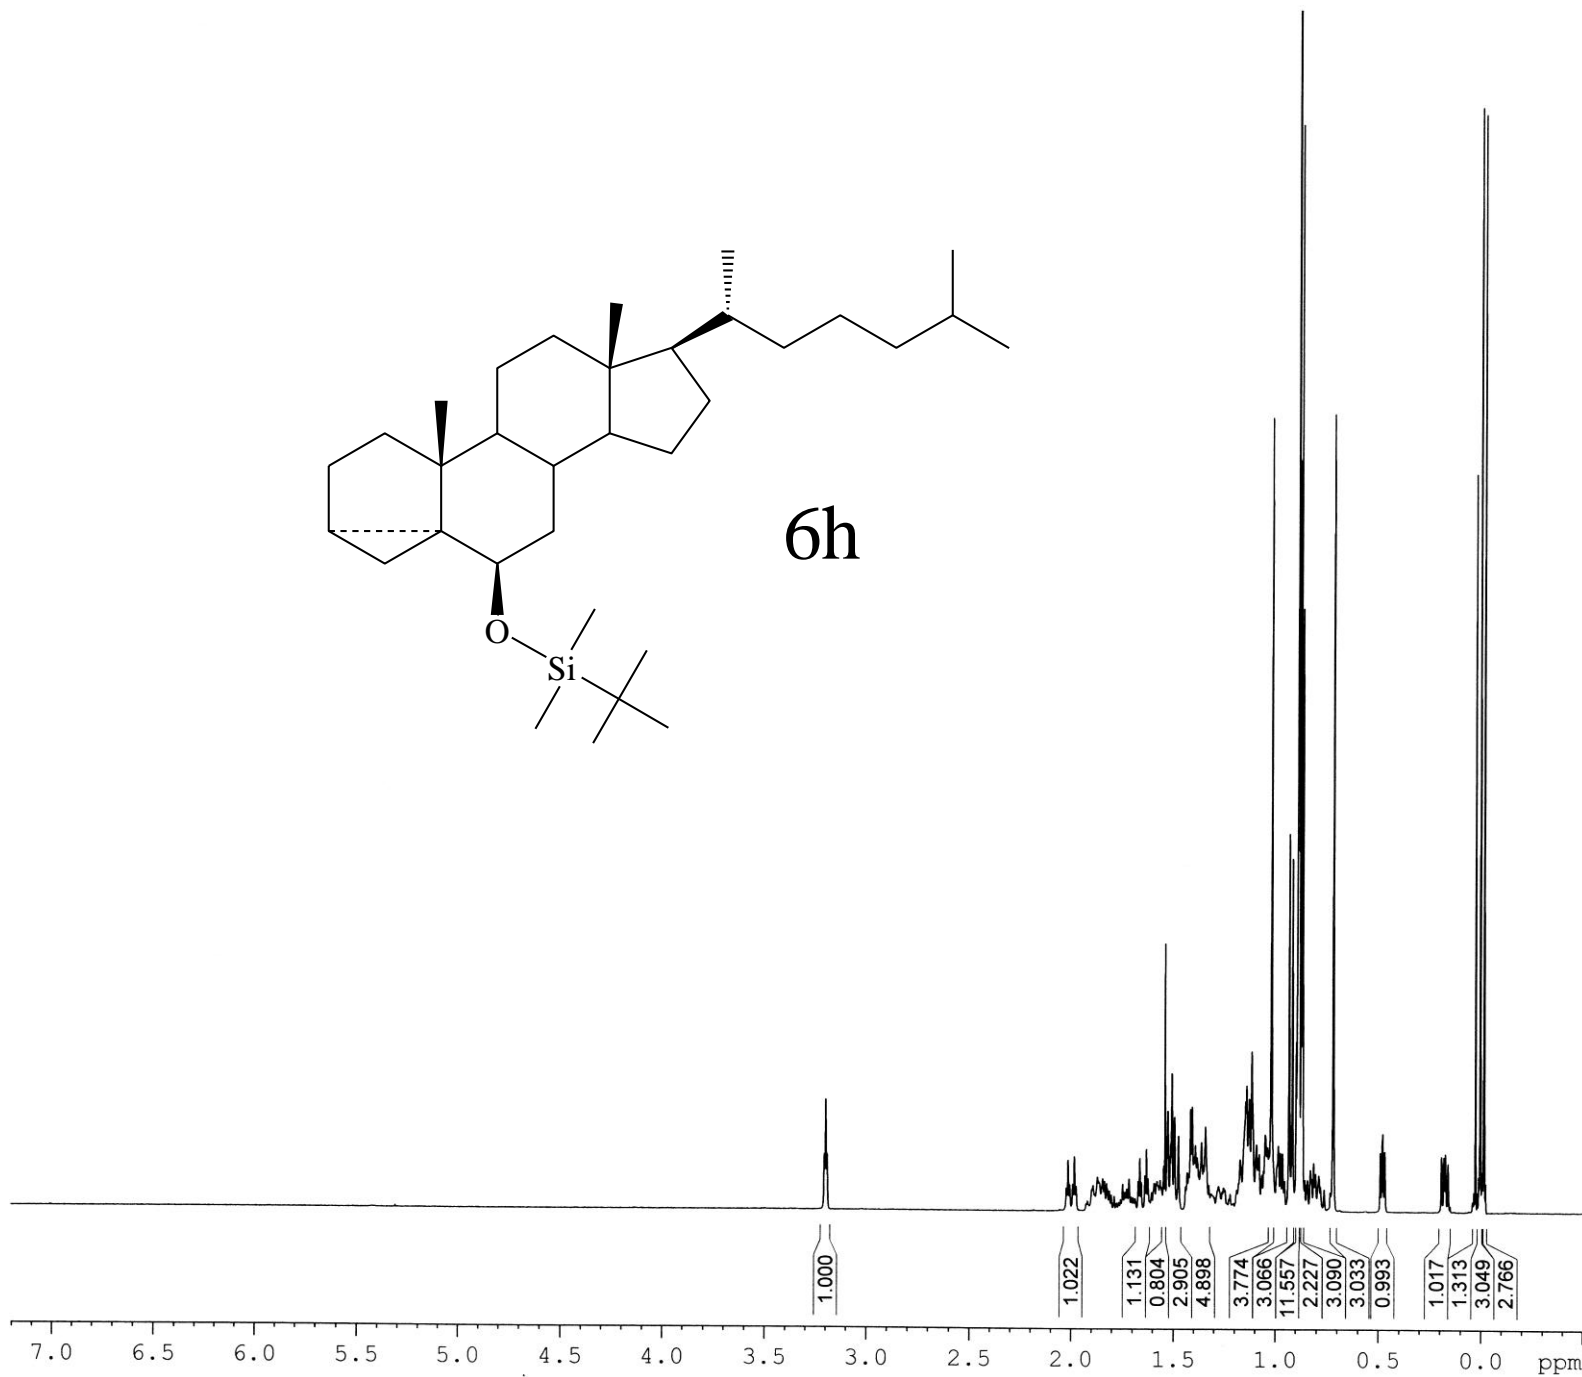

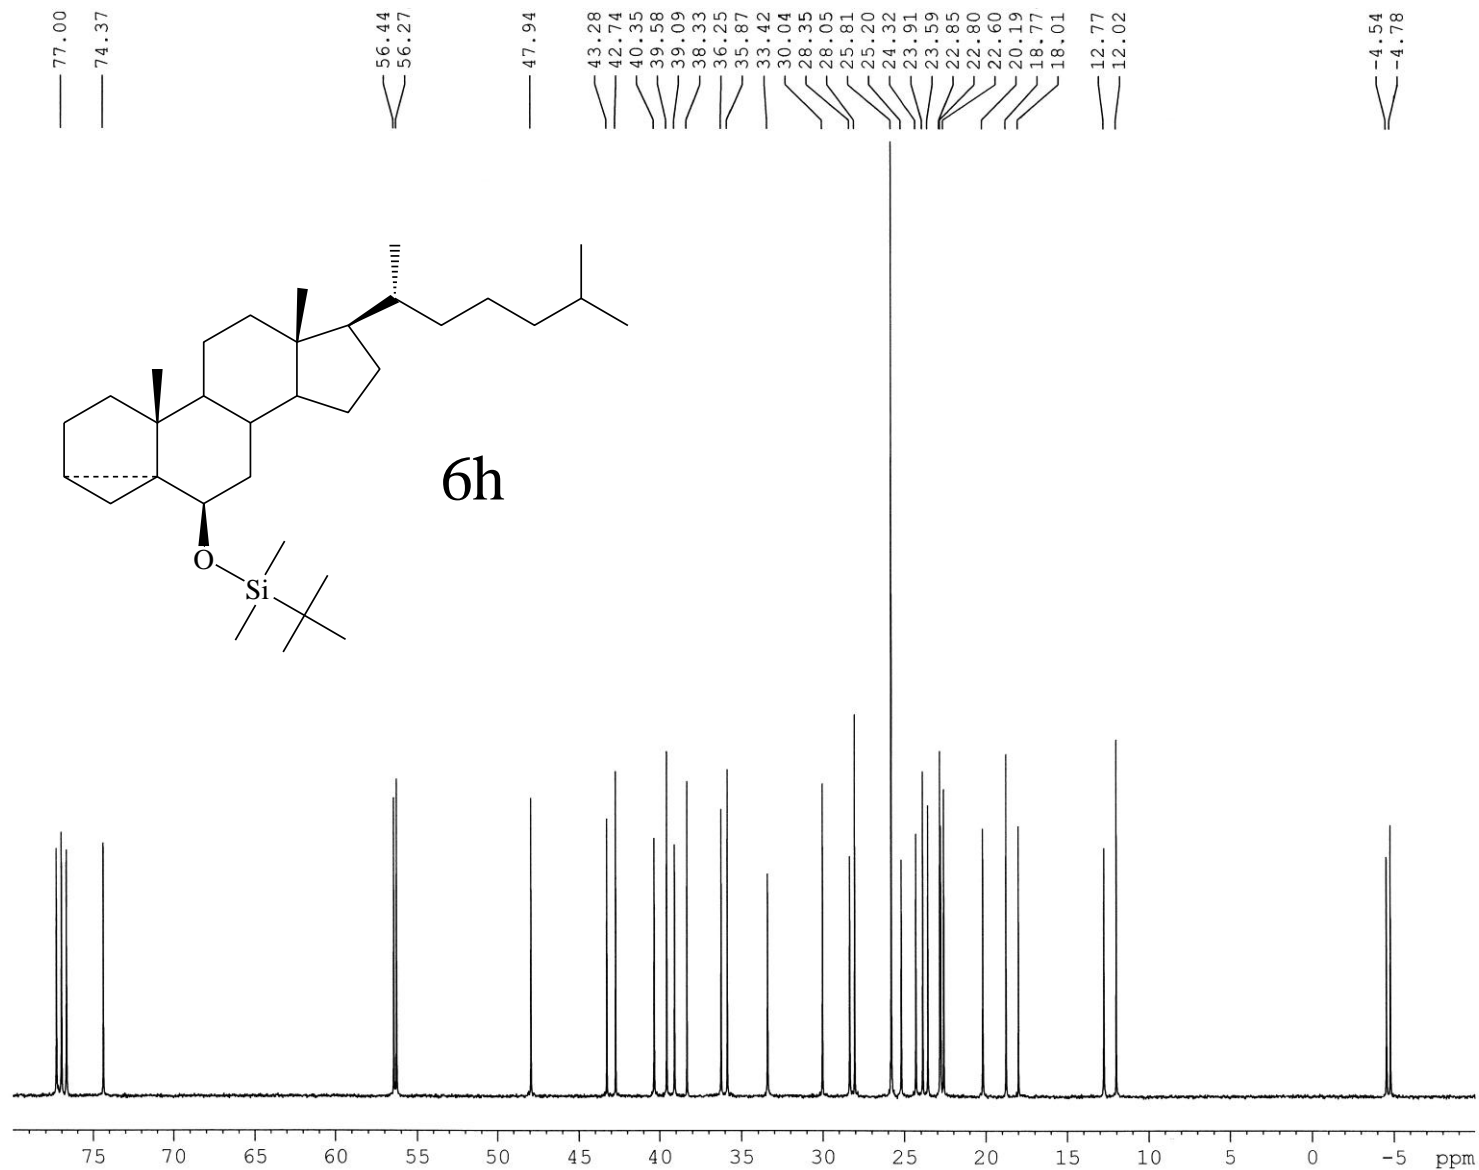

Current Data Parameters  
 NAME Abd VIII  
 EXPNO 2  
 PROCNO 1

F2 - Acquisition Parameters  
 Date\_ 20110309  
 Time\_ 16.48  
 INSTRUM spect  
 PROBHD 5 mm PABBO BB-  
 PULPROG zgpg30  
 TD 65536  
 SOLVENT CDCl3  
 NS 448  
 DS 4  
 SWH 27173.912 Hz  
 FIDRES 0.414641 Hz  
 AQ 1.2059124 sec  
 RG 1030  
 DW 18.400 usec  
 DE 6.00 usec  
 TE 299.9 K  
 D1 2.00000000 sec  
 d11 0.03000000 sec  
 DELTA 1.89999998 sec  
 TD0 1

===== CHANNEL f1 =====  
 NUC1 13C  
 P1 11.00 usec  
 PL1 -1.00 dB  
 SFO1 100.6288660 MHz

===== CHANNEL f2 =====  
 CPDPRG2 waltz16  
 NUC2 1H  
 PCPD2 100.00 usec  
 PL2 -3.00 dB  
 PL12 13.65 dB  
 PL13 18.00 dB  
 SFO2 400.1516006 MHz

F2 - Processing parameters  
 SI 32768  
 SF 100.6177950 MHz  
 WDW EM  
 SSB 0  
 LB 1.00 Hz  
 GB 0  
 PC 1.40

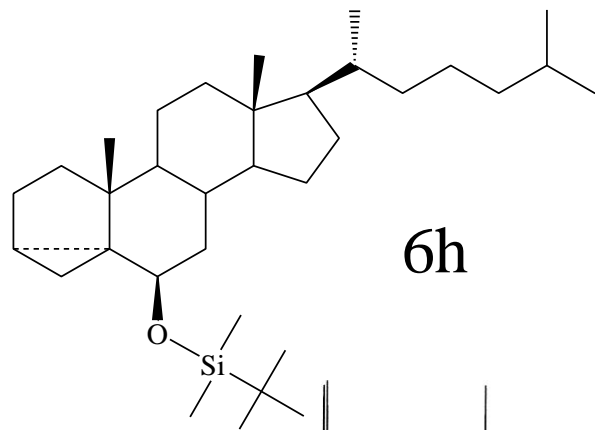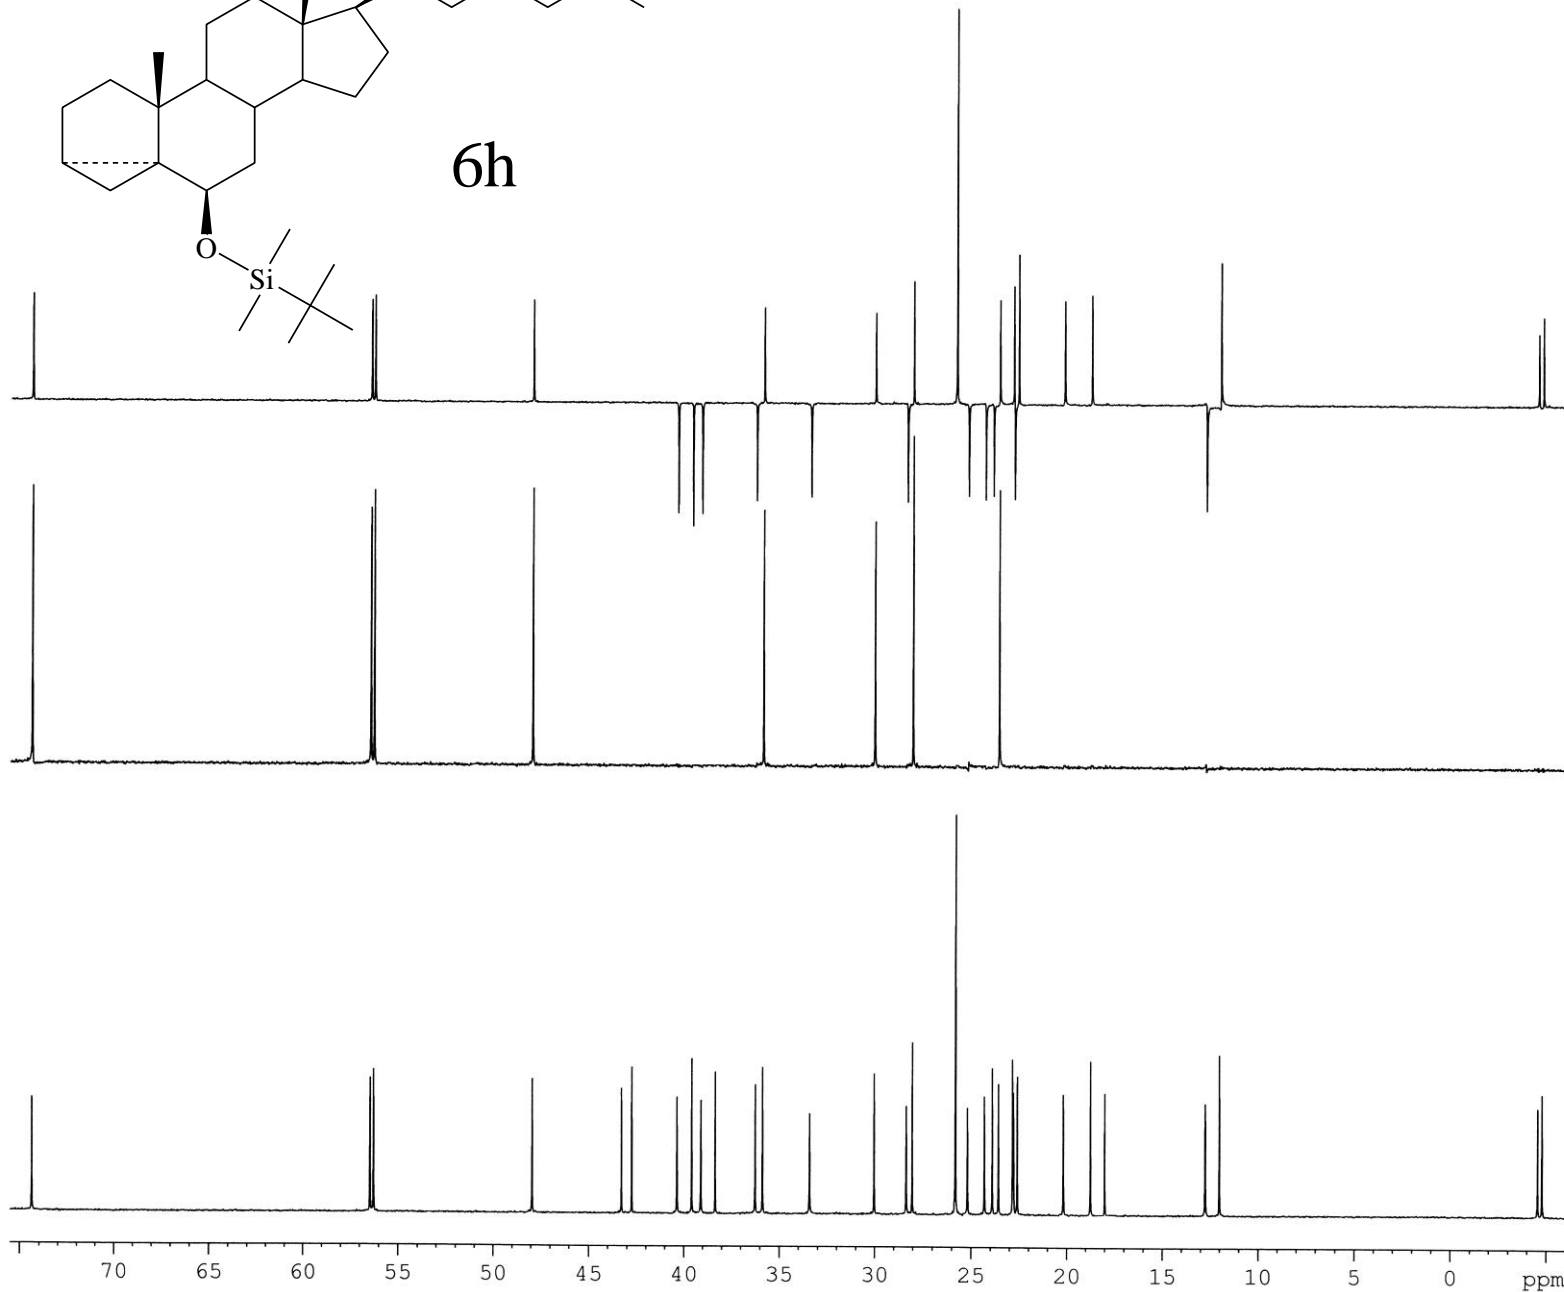

```

Current Data Parameters
NAME      Abd VIII
EXPNO    4
PROCNO   1

F2 - Acquisition Parameters
Date_    20110309
Time     17.25
INSTRUM  spect
PROBHD   5 mm PABBO BB-
PULPROG  dept135
TD       65536
SOLVENT  CDC13
NS       128
DS       4
SWH      24038.461 Hz
FIDRES   0.366798 Hz
AQ       1.3631988 sec
RG       1030
DW       20.800 usec
DE       6.00 usec
TE       299.8 K
CNST2    145.0000000
D1       2.00000000 sec
d2       0.00344828 sec
d12      0.00002000 sec
DELTA    0.00001401 sec
TD0      1

===== CHANNEL f1 =====
NUC1     13C
P1       11.00 usec
p2       22.00 usec
PL1      -1.00 dB
SFO1     100.6278593 MHz

===== CHANNEL f2 =====
CPDPRG2  waltz16
NUC2     1H
P3       14.70 usec
p4       29.40 usec
PCPD2    100.00 usec
PL2      -3.00 dB
PL12     13.65 dB
SFO2     400.1516006 MHz

F2 - Processing parameters
SI       32768
SF       100.6177949 MHz
WDW      EM
SSB      0
LB       1.00 Hz
GB       0
PC       0.50
  
```

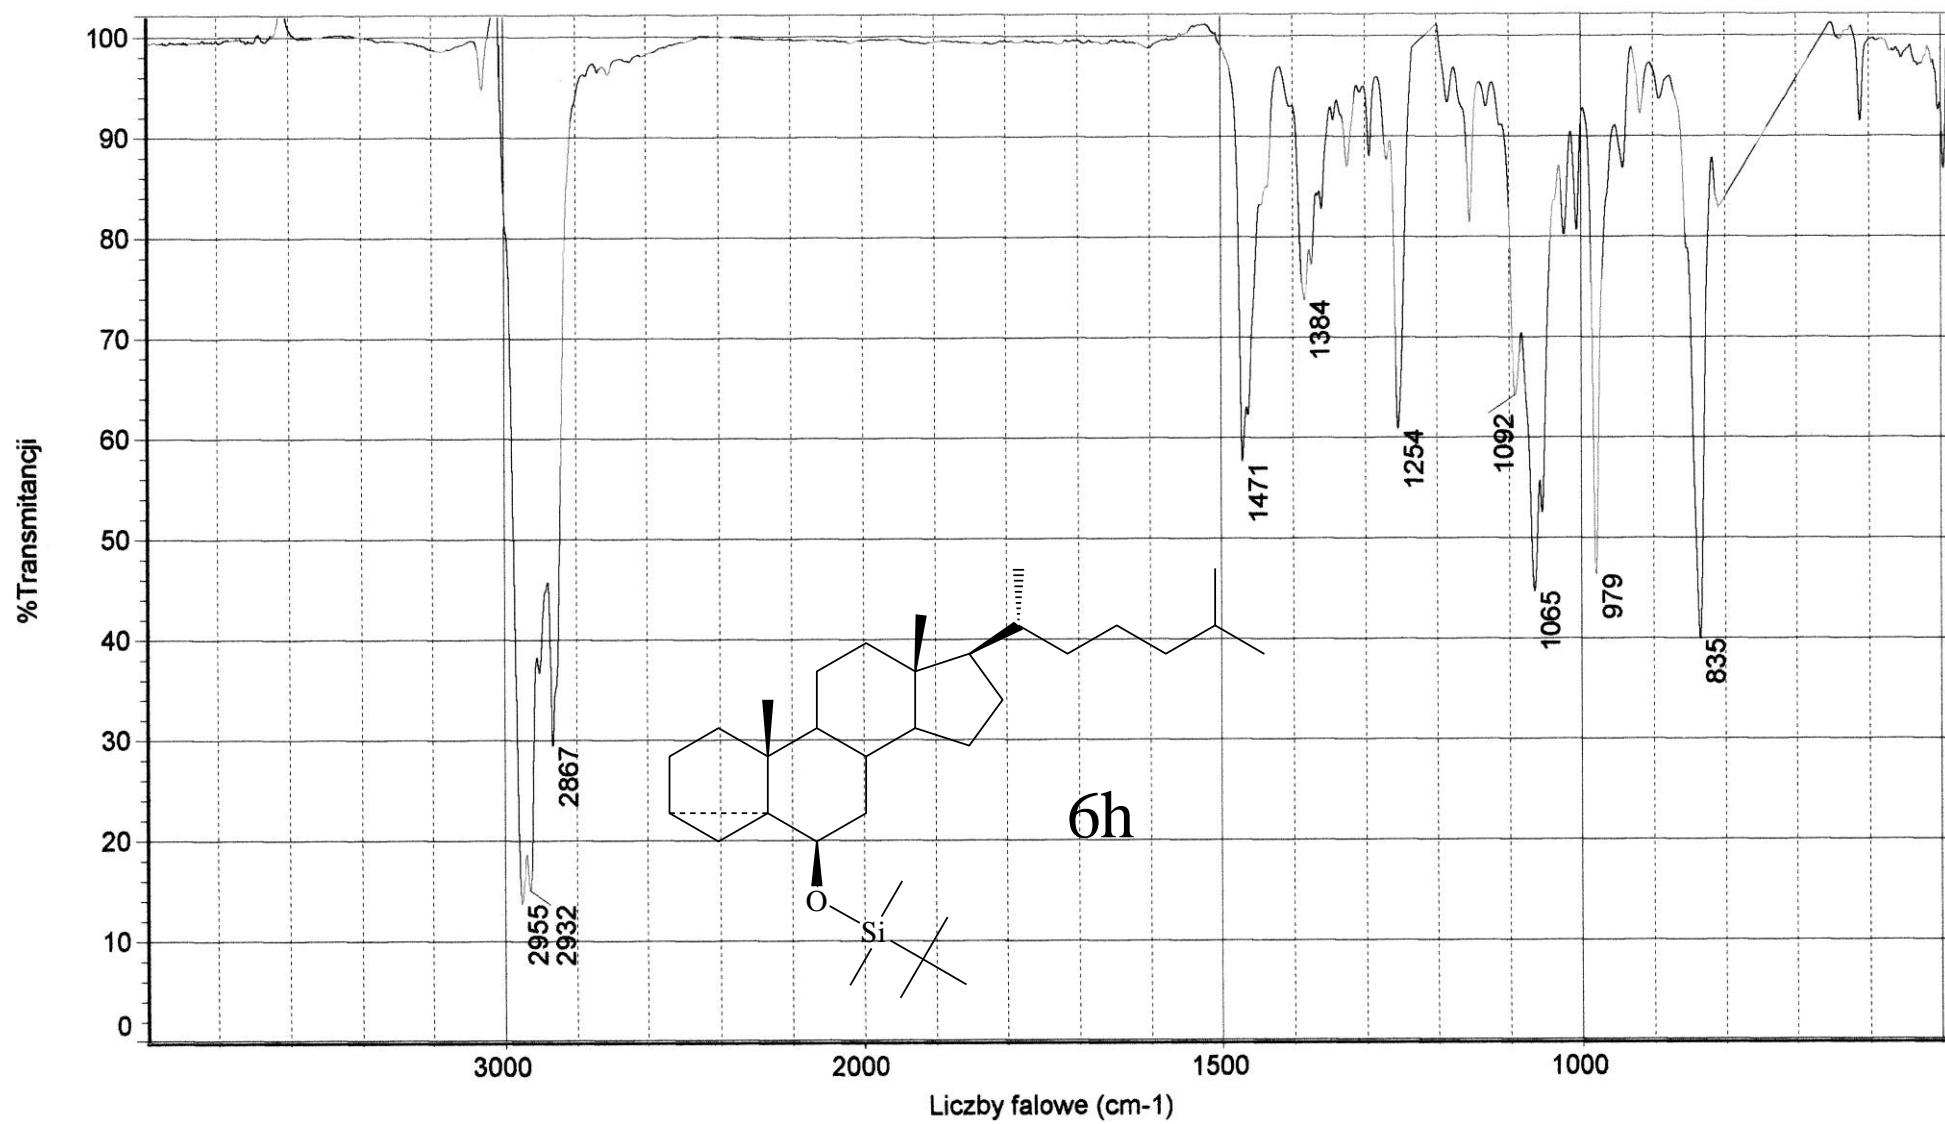

**A. Bd-VIII +HCOONa**

**LCT**

9742\_JWM\_HCOONa 74 (1.233) Cm (1:94)

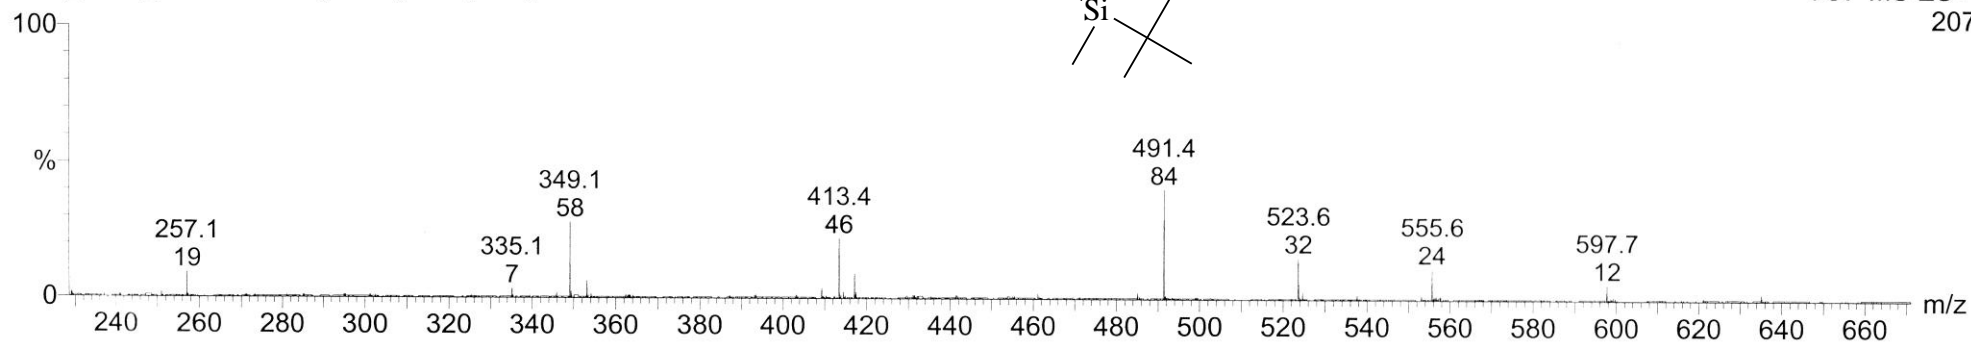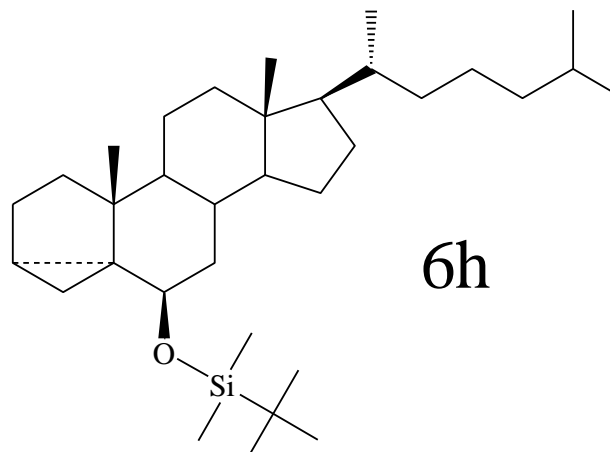

18-Jan-2011

TOF MS ES+  
207

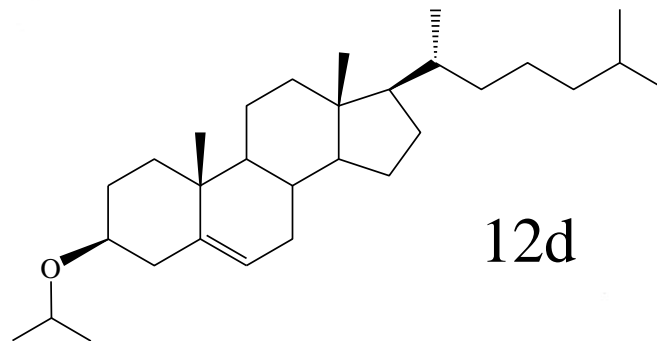

Current Data Parameters  
 NAME AT eterizopropylowyw3  
 EXPNO 1  
 PROCNO 1

F2 - Acquisition Parameters  
 Date\_ 20140425  
 Time 16.10  
 INSTRUM spect  
 PROBHD 5 mm PABBO BB-  
 PULPROG zg30  
 TD 65536  
 SOLVENT CDCl3  
 NS 64  
 DS 0  
 SWH 8223.685 Hz  
 FIDRES 0.125483 Hz  
 AQ 3.9846387 sec  
 RG 144  
 DW 60.800 usec  
 DE 8.00 usec  
 TE 298.6 K  
 D1 1.00000000 sec  
 TDO 1

===== CHANNEL f1 =====  
 NUC1 1H  
 P1 11.15 usec  
 PL1 -3.00 dB  
 SFO1 400.1524711 MHz

F2 - Processing parameters  
 SI 32768  
 SF 400.1500000 MHz  
 WDW GM  
 SSB 0  
 LB -0.20 Hz  
 GB 0.2  
 PC 1.00

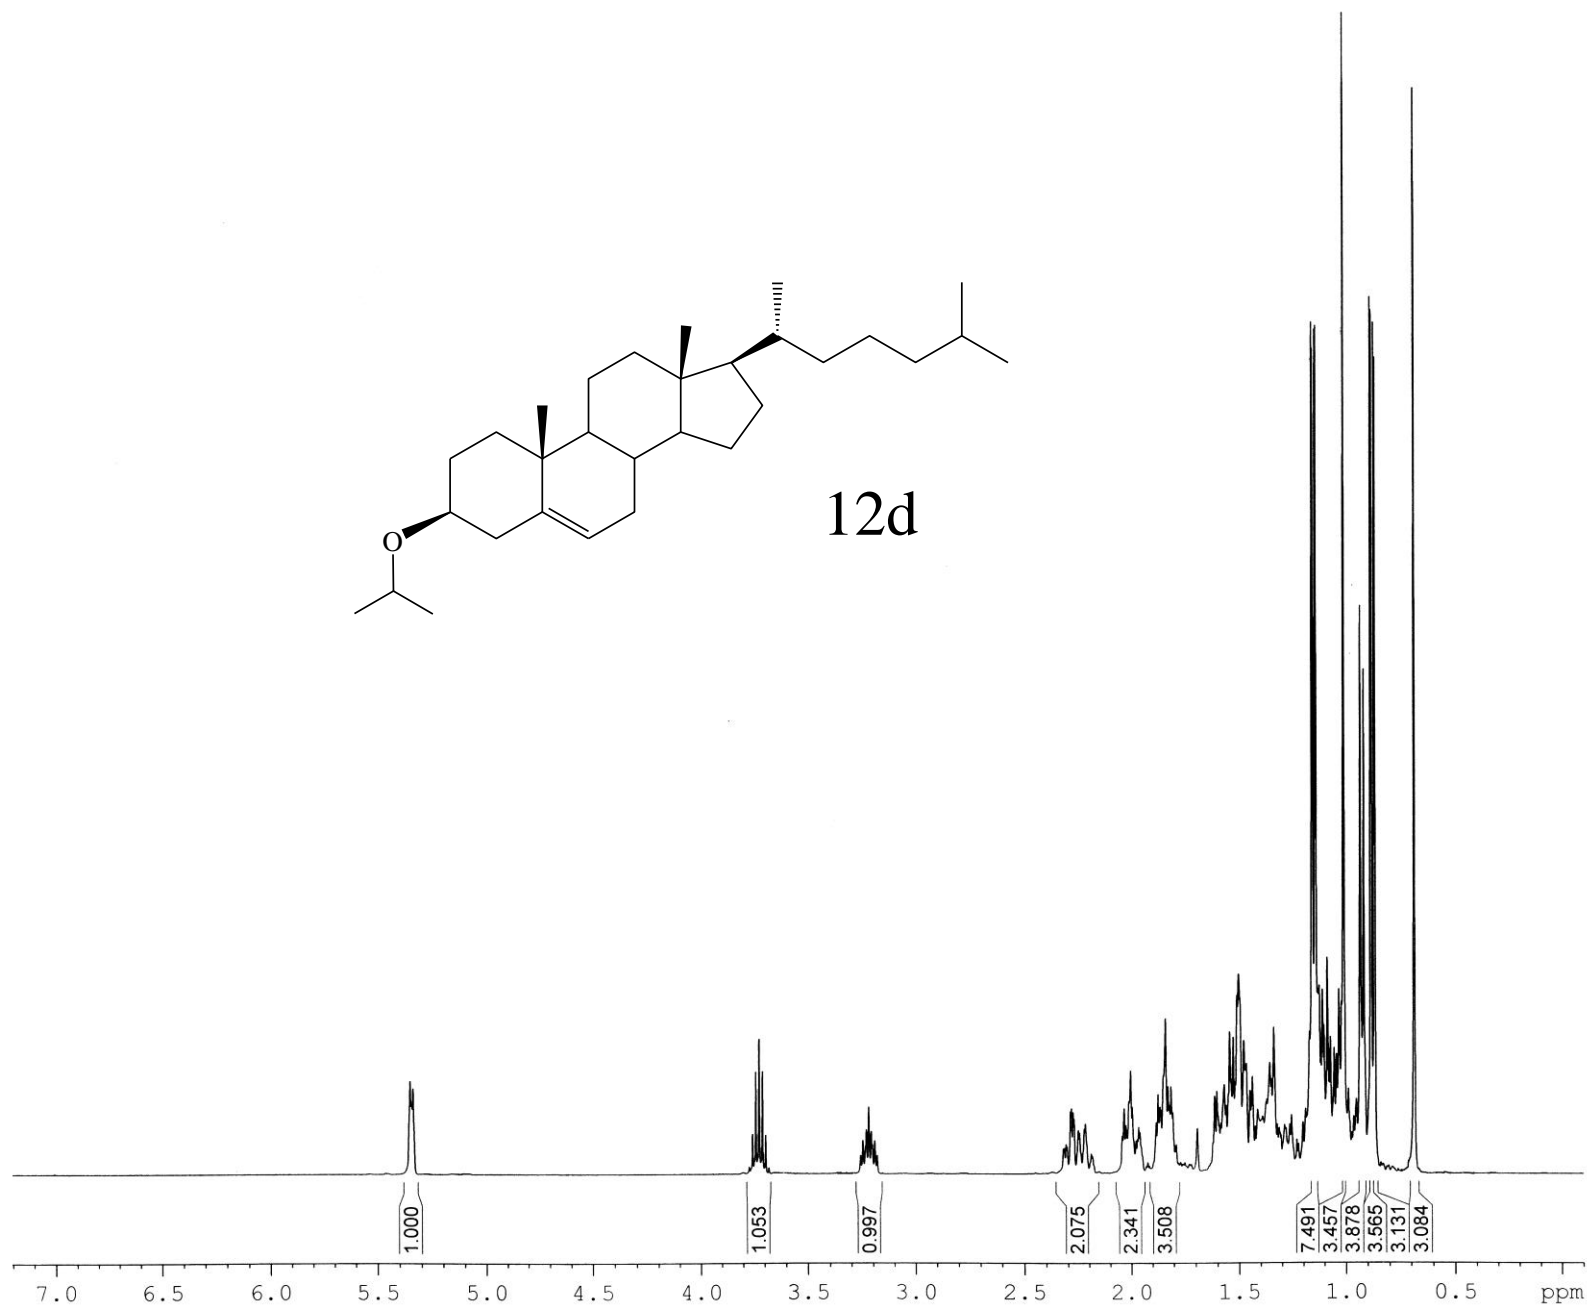

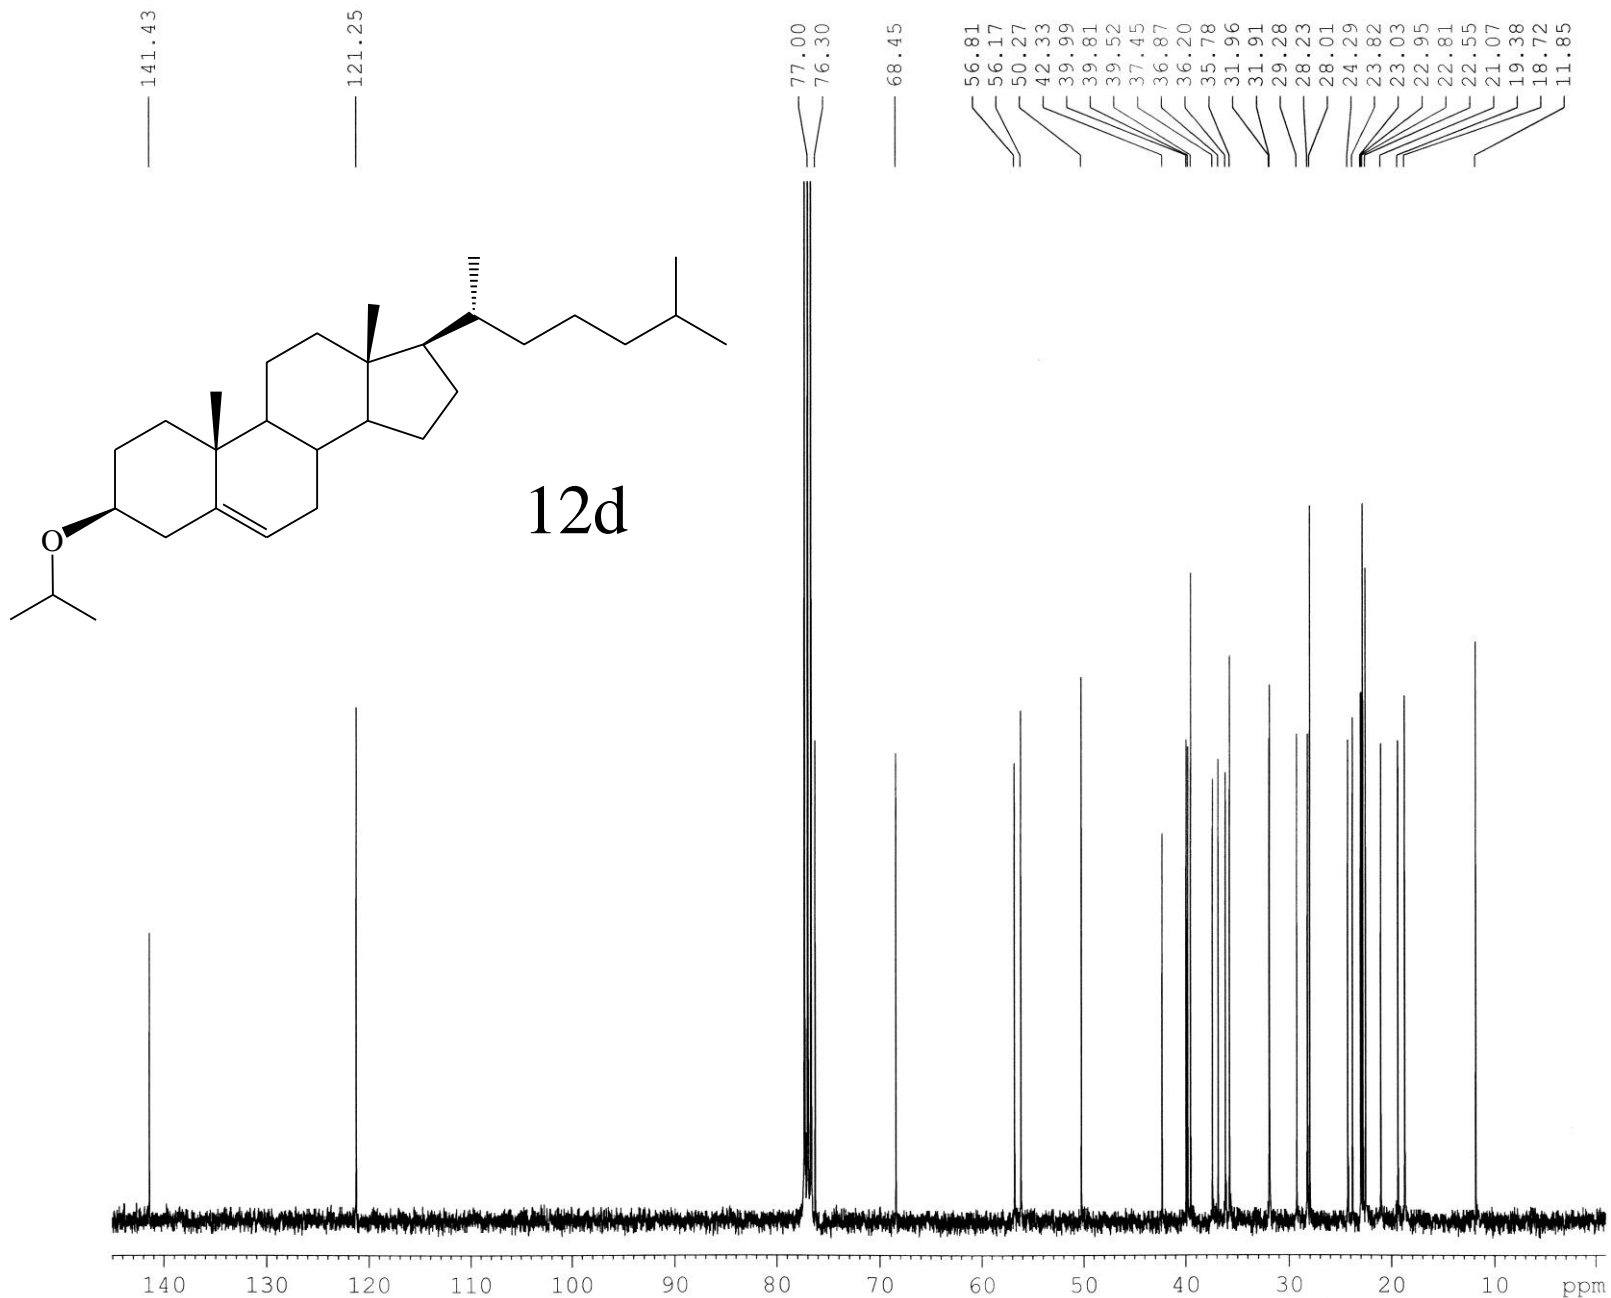

Current Data Parameters  
 NAME AT eterizopropylowyw3  
 EXPNO 2  
 PROCNO 1

F2 - Acquisition Parameters  
 Date\_ 20140425  
 Time\_ 16.16  
 INSTRUM spect  
 PROBHD 5 mm PABBO BB-  
 PULPROG zgpg30  
 TD 65536  
 SOLVENT CDC13  
 NS 768  
 DS 4  
 SWH 27173.912 Hz  
 FIDRES 0.414641 Hz  
 AQ 1.2059124 sec  
 RG 2050  
 DW 18.400 usec  
 DE 6.00 usec  
 TE 299.1 K  
 D1 2.00000000 sec  
 d11 0.03000000 sec  
 DELTA 1.89999998 sec  
 TD0 1

==== CHANNEL f1 =====  
 NUC1 13C  
 P1 12.25 usec  
 PL1 -1.00 dB  
 SFO1 100.6288660 MHz

==== CHANNEL f2 =====  
 CPDPRG2 waitz16  
 NUC2 1H  
 PCPD2 100.00 usec  
 PL2 -3.00 dB  
 PL12 13.65 dB  
 PL13 18.00 dB  
 SFO2 400.1516006 MHz

F2 - Processing parameters  
 SI 32768  
 SF 100.6177982 MHz  
 WDW EM  
 SSB 0  
 LB 1.00 Hz  
 GB 0  
 PC 1.40



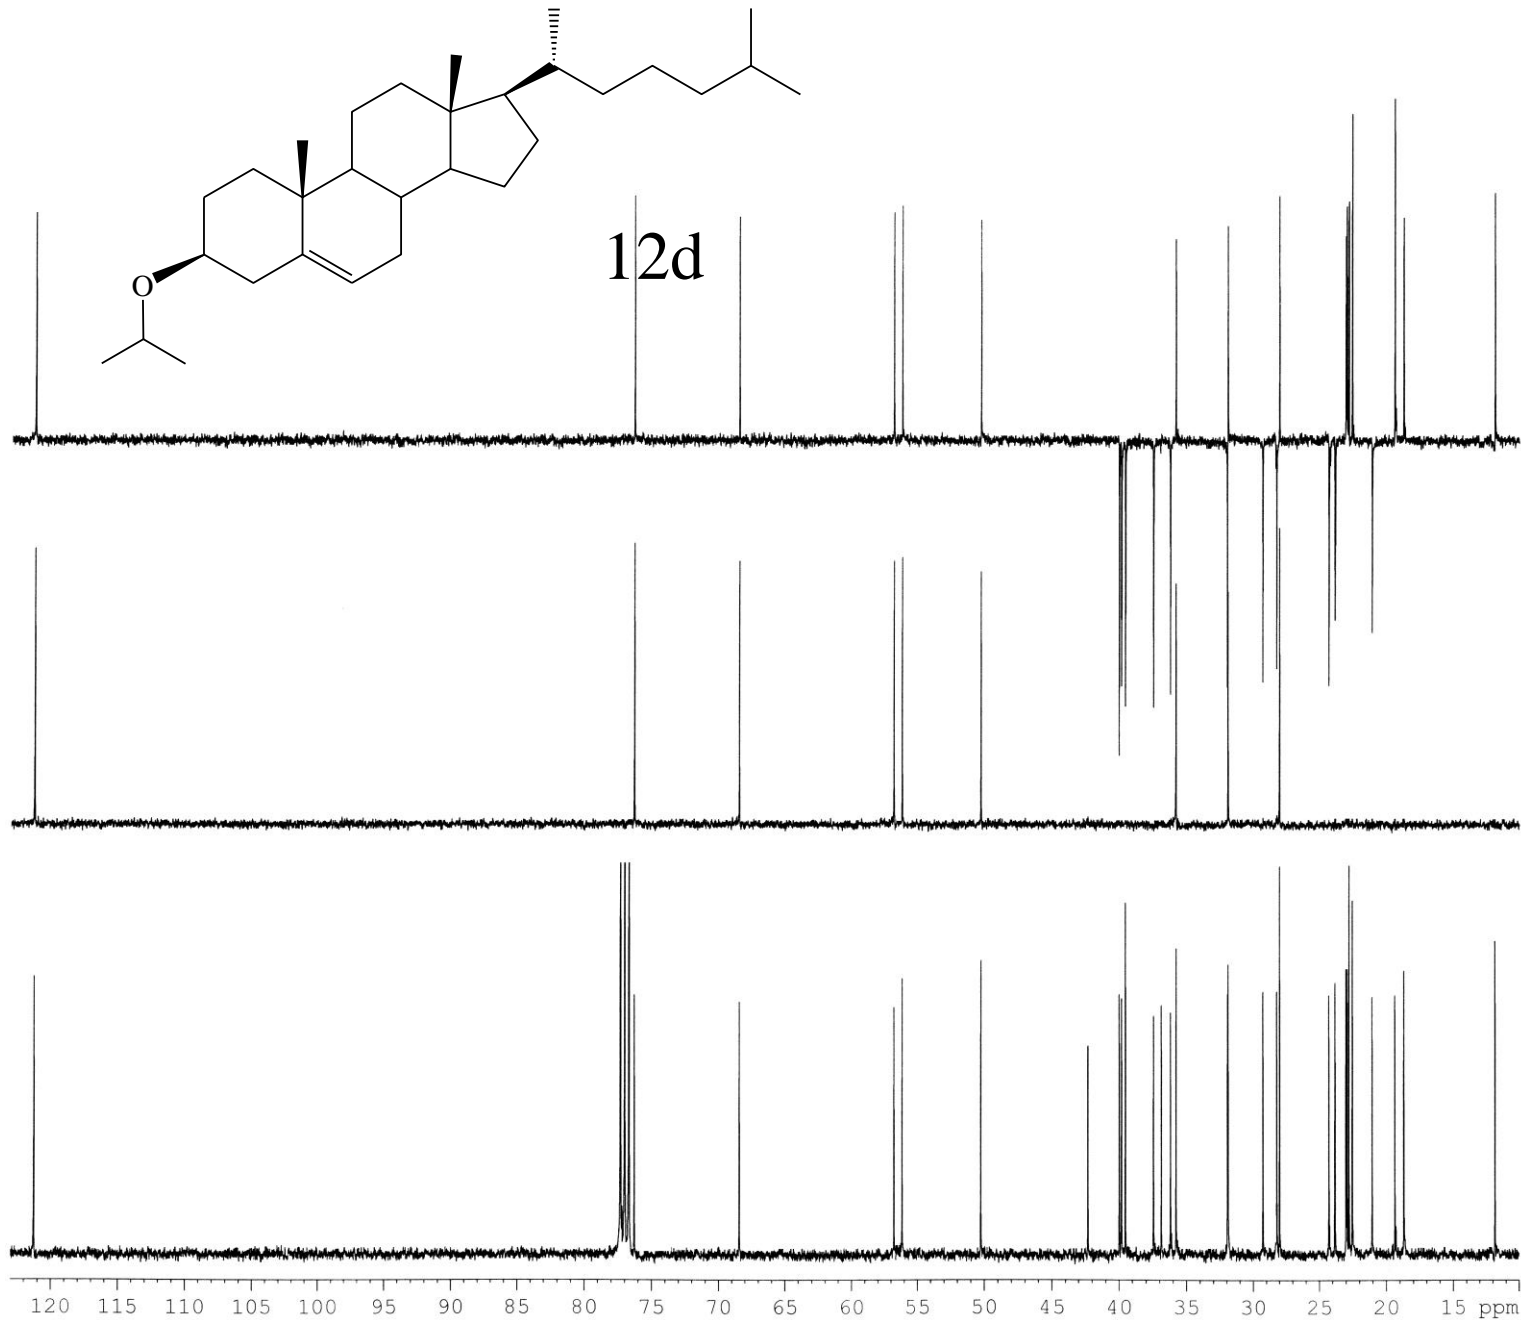

Current Data Parameters  
 NAME AT eterizopropylowy3  
 EXPNO 4  
 PROCNO 1

F2 - Acquisition Parameters  
 Date\_ 20140425  
 Time 17.28  
 INSTRUM spect  
 PROBHD 5 mm PABBO BB-  
 PULPROG dept135  
 TD 65536  
 SOLVENT CDCl3  
 NS 320  
 DS 4  
 SWH 24038.461 Hz  
 FIDRES 0.366798 Hz  
 AQ 1.3631988 sec  
 RG 2050  
 DW 20.800 usec  
 DE 6.00 usec  
 TE 299.4 K  
 CNST2 145.0000000  
 D1 2.0000000 sec  
 d2 0.00344828 sec  
 d12 0.00002000 sec  
 DELTA 0.00001560 sec  
 TD0 1

===== CHANNEL f1 =====  
 NUC1 13C  
 P1 12.25 usec  
 p2 24.50 usec  
 PL1 -1.00 dB  
 SFO1 100.6278593 MHz

===== CHANNEL f2 =====  
 CPDPRG2 waltz16  
 NUC2 1H  
 P3 14.70 usec  
 p4 29.40 usec  
 PCPD2 100.00 usec  
 PL2 -3.00 dB  
 PL12 13.65 dB  
 SFO2 400.1516006 MHz

F2 - Processing parameters  
 SI 32768  
 SF 100.6177983 MHz  
 WDW EM  
 SSB 0  
 LB 1.00 Hz  
 GB 0  
 PC 1.40

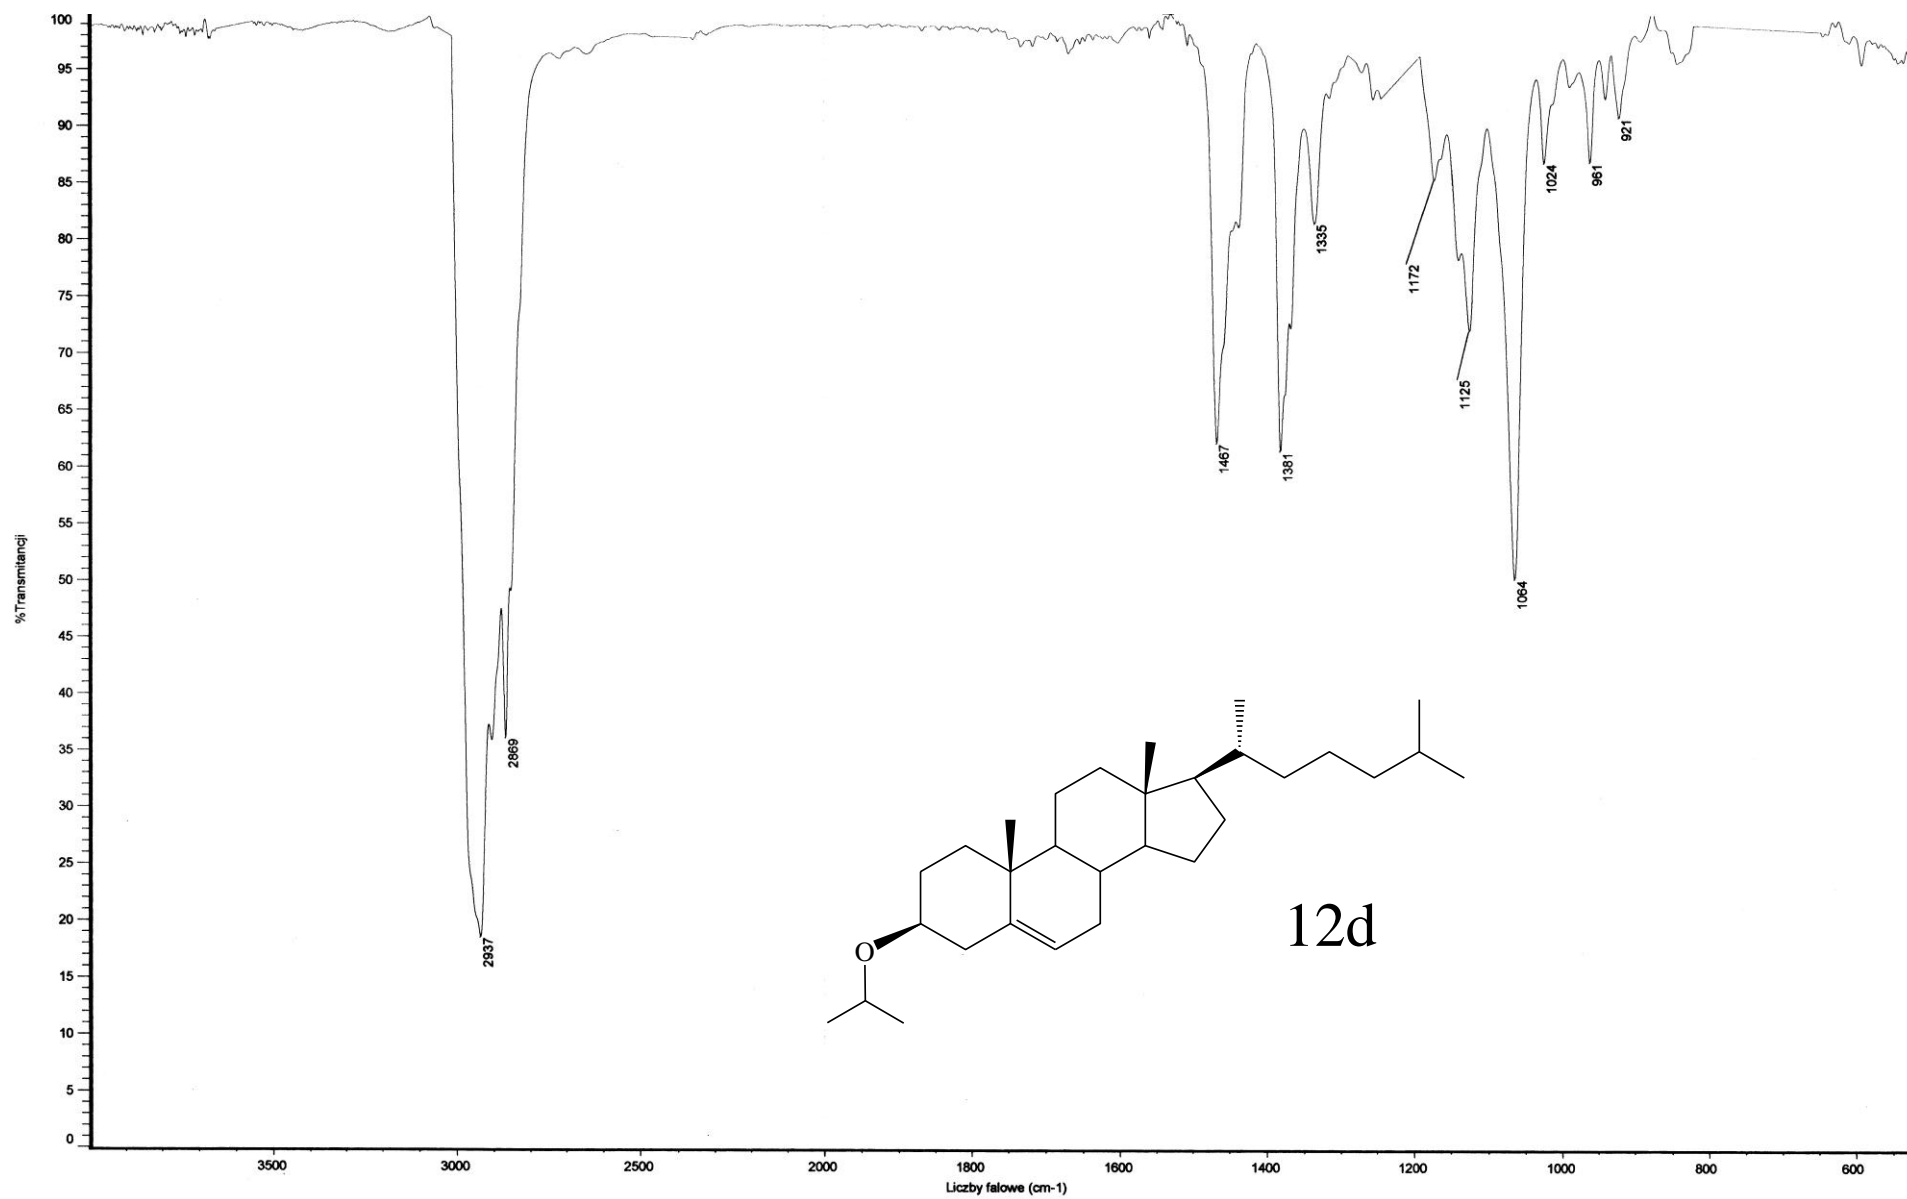

J. Morzycki  
eter izopropylowy w3  
ub\_jm1100 54 (4.396) Cm (54:72-5:8)

AUTOSPEC

14-Apr-2014 10:30:58  
operator: Malgorzata Grela  
Magnet EI+  
5.01e3

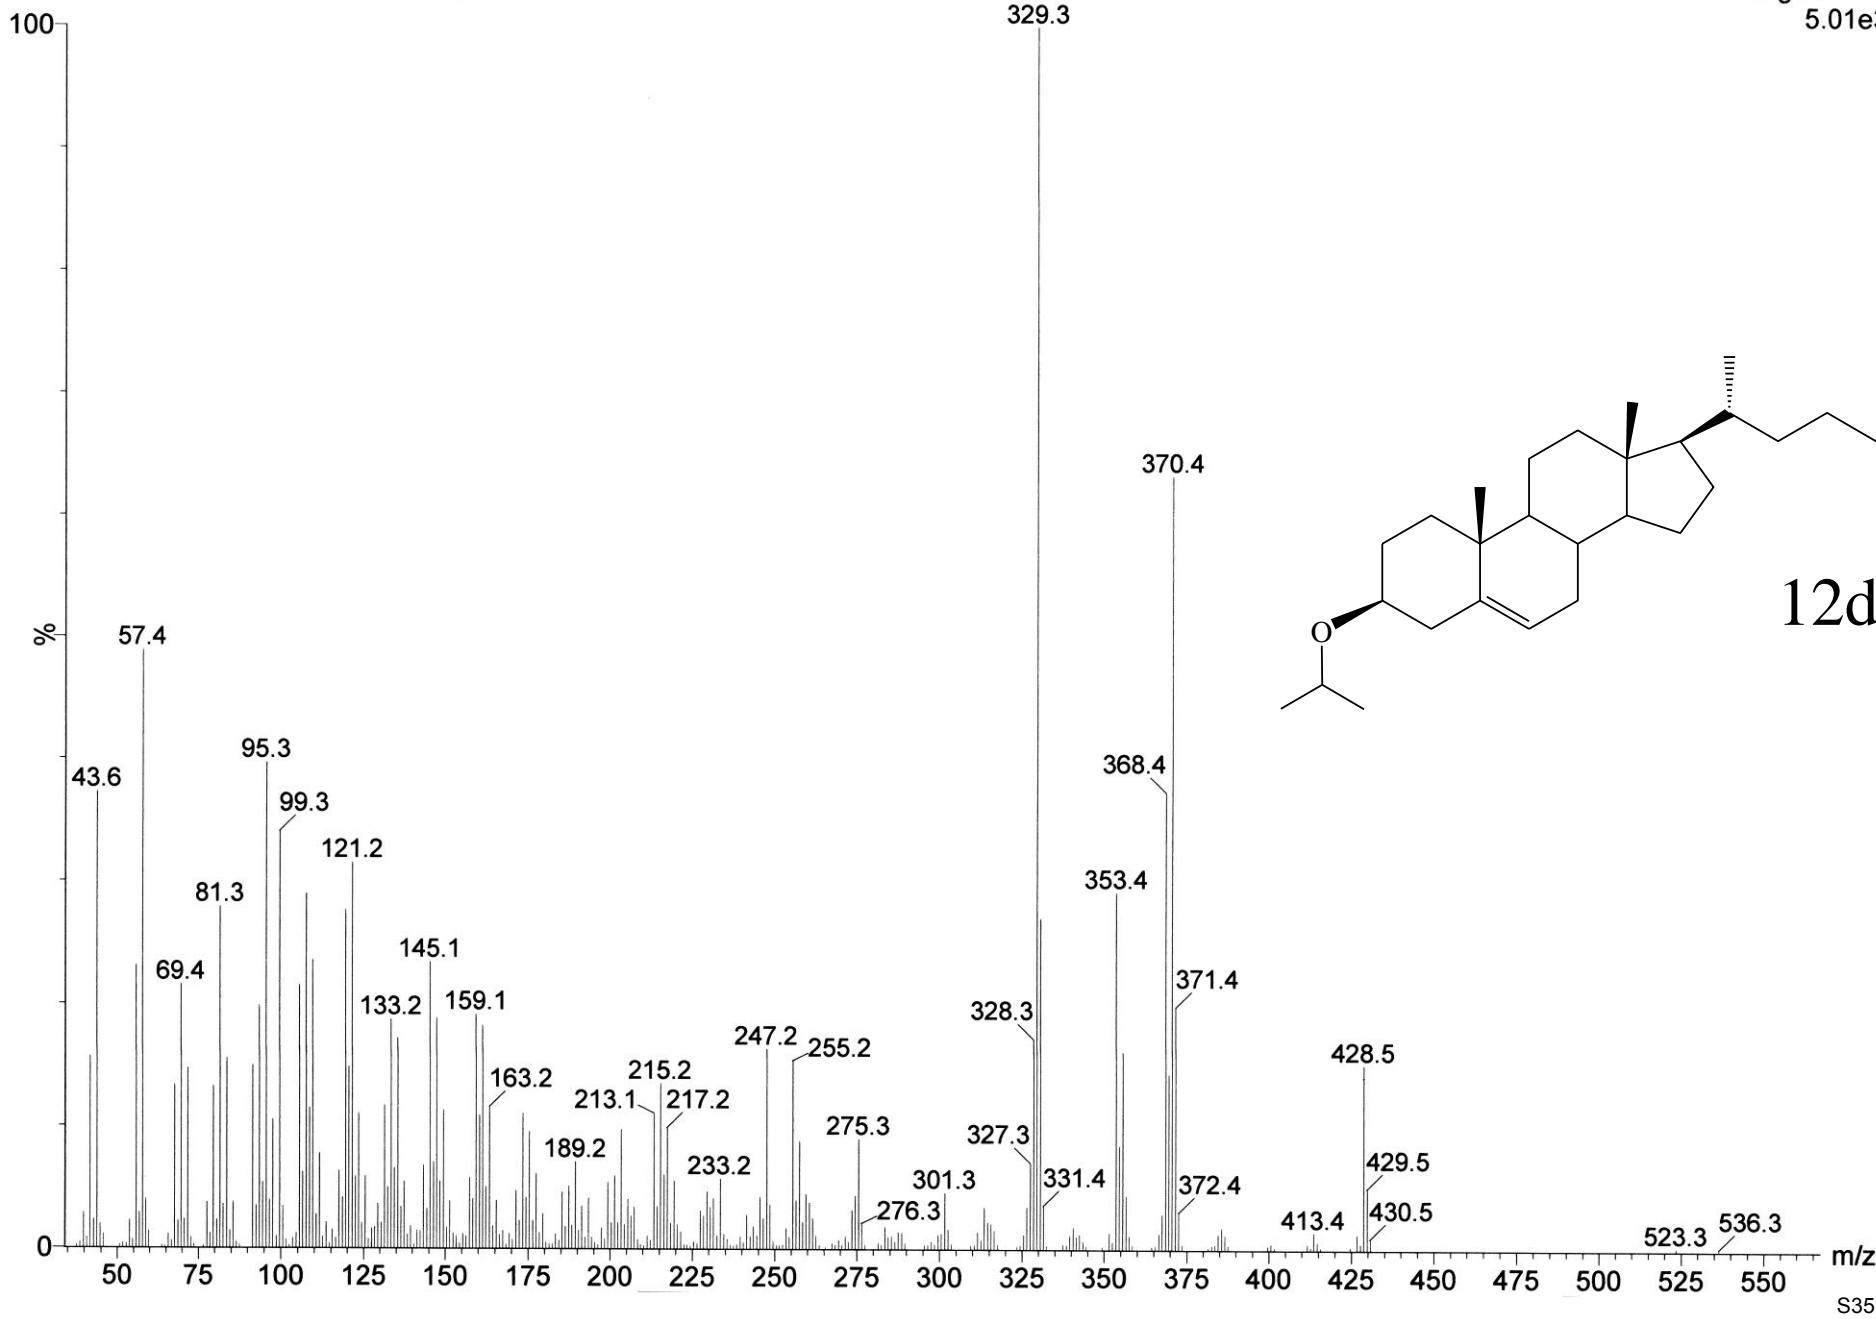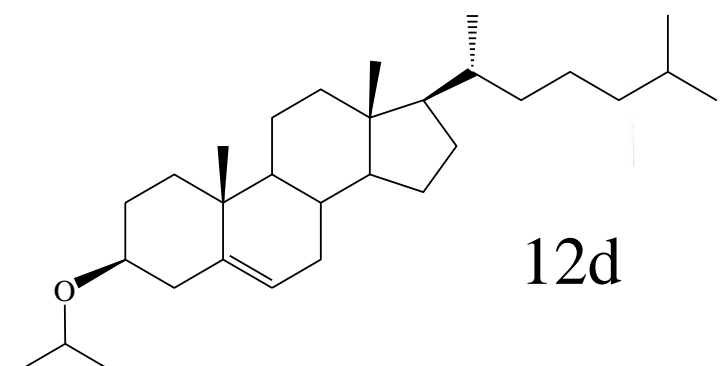

Supplement: Beilstein_J_Org_Chem-11-162-s001.pdf [file Beilstein_J_Org_Chem-11-162-s001.pdf]
